# Supplementary material for: Hybridization With an Invasive Plant of Xanthium strumarium Improves the Tolerance of Its Native Congener X. sibiricum to Cadmium
Source: Front Plant Sci. 2021 Jul 29;12:696687. doi: 10.3389/fpls.2021.696687 (PMC8358311; doi:10.3389/fpls.2021.696687)
Supplement: Supplementary file 4 [file Data_Sheet_4.xlsx]

## Sheet: Sheet1
Blue represents up-regulated DEGs; Yellow represents down-regulated DEGs
ID	BaseMean (LT)	BaseMean (ZLT)	foldchange(ZLT/LT)	pvalue	padj	Length	GO	KEGG	PFAM	eggNOG	eggNOG_Category	Swissprot	NR
TRINITY_DN19_c0_g2	9.13849	100.15	10.9592	0.000144208	0.131492	1392	GO:0035556;GO:0004435;GO:0004871;GO:0016042;GO:0005622	K05857	-	virNOG00340	I	sp|Q944C1|PLCD4_ARATH Phosphoinositide phospholipase C 4 OS=Arabidopsis thaliana GN=PLC4 PE=2 SV=2	gi|976918504|gb|KVI03680.1| C2 calcium-dependent membrane targeting [Cynara cardunculus var. scolymus]
TRINITY_DN75_c1_g3	7.13589	32.8416	4.60231	0.00733427	1	1126	GO:0003684;GO:0008270;GO:0008534;GO:0006284;GO:0006289	K10563	-	COG0266;virNOG06203	L	sp|O80358|FPG_ARATH Formamidopyrimidine-DNA glycosylase OS=Arabidopsis thaliana GN=FPG1 PE=1 SV=1	gi|727439005|ref|XP_010500852.1| PREDICTED: formamidopyrimidine-DNA glycosylase isoform X2 [Camelina sativa]
TRINITY_DN75_c0_g1	3579.05	11861.2	3.31407	4.35866e-07	0.00119791	2615	-	-	-	virNOG25348;virNOG24583	S	-	gi|527195118|gb|EPS64483.1| hypothetical protein M569_10301, partial [Genlisea aurea]
TRINITY_DN87_c0_g3	614.745	1635.74	2.66085	0.00155375	0.670328	3334	GO:0006355	-	PF03514	virNOG03579	K	sp|Q9XE58|SCL14_ARATH Scarecrow-like protein 14 OS=Arabidopsis thaliana GN=SCL14 PE=2 SV=2	gi|976918437|gb|KVI03615.1| Transcription factor GRAS [Cynara cardunculus var. scolymus]
TRINITY_DN96_c0_g2	18.6183	51.6595	2.77466	0.0405518	1	764	-	-	-	virNOG25631	S	-	gi|976907803|gb|KVH95051.1| hypothetical protein Ccrd_002880 [Cynara cardunculus var. scolymus]
TRINITY_DN117_c0_g4	33.4039	79.97	2.39403	0.0196973	1	1358	-	-	-	virNOG00750	DO	sp|F4IRM4|PHOX1_ARATH Protein PHOX1 OS=Arabidopsis thaliana GN=PHOX1 PE=1 SV=1	gi|976909388|gb|KVH96506.1| Phox/Bem1p [Cynara cardunculus var. scolymus]
TRINITY_DN117_c0_g1	501.706	1181.37	2.35471	0.000787942	0.420642	2669	-	-	PF00564	virNOG00750	OD	sp|F4IRM4|PHOX1_ARATH Protein PHOX1 OS=Arabidopsis thaliana GN=PHOX1 PE=1 SV=1	gi|976909388|gb|KVH96506.1| Phox/Bem1p [Cynara cardunculus var. scolymus]
TRINITY_DN122_c0_g1	101.917	240.945	2.36412	0.00268103	0.921044	2887	GO:0008168;GO:0016021;GO:0032259	-	PF08241;PF05050	virNOG03684	R	-	gi|976918041|gb|KVI03270.1| hypothetical protein Ccrd_018430 [Cynara cardunculus var. scolymus]
TRINITY_DN125_c0_g1	124.151	524.732	4.22655	0.000252675	0.193296	1717	GO:0004842;GO:0016567	-	PF04564	virNOG07650	O	sp|Q84TG3|PUB23_ARATH E3 ubiquitin-protein ligase PUB23 OS=Arabidopsis thaliana GN=PUB23 PE=1 SV=1	gi|976902631|gb|KVH90570.1| Armadillo-like helical [Cynara cardunculus var. scolymus]
TRINITY_DN125_c0_g2	29.8069	532.197	17.8548	0.0169796	1	1729	GO:0004842;GO:0016567	-	PF04564	virNOG07650	O	sp|Q84TG3|PUB23_ARATH E3 ubiquitin-protein ligase PUB23 OS=Arabidopsis thaliana GN=PUB23 PE=1 SV=1	gi|976885443|gb|KVH74994.1| Armadillo-like helical [Cynara cardunculus var. scolymus]
TRINITY_DN131_c0_g2	381.036	1655.53	4.3448	0.020325	1	726	-	-	-	virNOG18589;virNOG36222;virNOG25403	S	-	gi|976900510|gb|KVH88699.1| hypothetical protein Ccrd_026043 [Cynara cardunculus var. scolymus]
TRINITY_DN149_c0_g2	2535.36	7535.28	2.97207	4.21695e-06	0.00782297	4620	GO:0016311;GO:0004805;GO:0005992;GO:0003825	K16055	PF00982;PF02358	virNOG00839	G	sp|Q9LMI0|TPS7_ARATH Probable alpha,alpha-trehalose-phosphate synthase [UDP-forming] 7 OS=Arabidopsis thaliana GN=TPS7 PE=1 SV=1	gi|976909756|gb|KVH96785.1| Glycosyl transferase, family 20 [Cynara cardunculus var. scolymus]
TRINITY_DN150_c0_g1	2002.01	4274.04	2.13487	0.036834	1	6343	-	-	PF07714;PF13855	virNOG13615	T	sp|C0LGK4|Y2165_ARATH Probable LRR receptor-like serine/threonine-protein kinase At2g16250 OS=Arabidopsis thaliana GN=At2g16250 PE=2 SV=1	gi|976921923|gb|KVI06562.1| Concanavalin A-like lectin/glucanase, subgroup [Cynara cardunculus var. scolymus]
TRINITY_DN168_c1_g1	599.156	1673.47	2.79305	0.0374098	1	2174	GO:0016021;GO:0071555;GO:0047262;GO:0045489;GO:0000139	K13648	PF01501	virNOG06657	G	sp|Q9LSG3|GAUT8_ARATH Galacturonosyltransferase 8 OS=Arabidopsis thaliana GN=GAUT8 PE=1 SV=1	gi|976929406|gb|KVI12256.1| Glycosyl transferase, family 8 [Cynara cardunculus var. scolymus]
TRINITY_DN184_c0_g2	720.4	1914.01	2.65687	0.000559179	0.329317	1972	GO:0016021	K14209	PF01490	virNOG07624	E	sp|Q9SVG0|AVT3C_ARATH Amino acid transporter AVT3C OS=Arabidopsis thaliana GN=AVT3C PE=1 SV=1	gi|976924781|gb|KVI08716.1| hypothetical protein Ccrd_012909 [Cynara cardunculus var. scolymus]
TRINITY_DN203_c0_g1	1711.24	3498.55	2.04445	0.00791855	1	2612	GO:0004842;GO:0016567	-	PF00514;PF04564	virNOG15937	S	sp|Q9C9A6|PUB10_ARATH U-box domain-containing protein 10 OS=Arabidopsis thaliana GN=PUB10 PE=2 SV=1	gi|976909067|gb|KVH96250.1| hypothetical protein Ccrd_001655 [Cynara cardunculus var. scolymus]
TRINITY_DN206_c5_g2	19.3843	93.8021	4.83908	0.00578637	1	490	GO:0050662;GO:0016021;GO:0050379;GO:0005975	K08679	-	virNOG04514;COG0451	MG	sp|Q9M0B6|GAE1_ARATH UDP-glucuronate 4-epimerase 1 OS=Arabidopsis thaliana GN=GAE1 PE=1 SV=1	gi|976915418|gb|KVI01369.1| NAD-dependent epimerase/dehydratase [Cynara cardunculus var. scolymus]
TRINITY_DN214_c1_g2	156.667	380.702	2.43	0.0205876	1	626	-	-	-	virNOG19049;KOG1471	RI	sp|Q9FKT1|LLG1_ARATH GPI-anchored protein LLG1 OS=Arabidopsis thaliana GN=LLG1 PE=1 SV=1	gi|976926414|gb|KVI10279.1| hypothetical protein Ccrd_011311 [Cynara cardunculus var. scolymus]
TRINITY_DN220_c3_g1	0.332312	17.8934	53.8452	0.000433864	0.27517	912	-	-	-	-	-	-	-
TRINITY_DN222_c0_g1	461.014	1826.03	3.9609	0.014332	1	2224	GO:0005634;GO:0005737	-	PF00514	KOG0167;virNOG04371	S	sp|A2ZLU6|SL11_ORYSI Protein spotted leaf 11 OS=Oryza sativa subsp. indica GN=SPL11 PE=1 SV=2	gi|734413594|gb|KHN36964.1| U-box domain-containing protein 4 [Glycine soja]
TRINITY_DN234_c0_g1	325.272	1180.92	3.63057	0.00609703	1	1238	-	-	-	virNOG08756;KOG1922	TZ	-	gi|976918594|gb|KVI03767.1| Actin-binding FH2 [Cynara cardunculus var. scolymus]
TRINITY_DN239_c0_g1	452.198	959.623	2.12213	0.00198199	0.782305	1984	GO:0008270;GO:0016021	-	PF13639	virNOG10564	O	sp|Q8GT75|NIP1_ARATH NEP1-interacting protein 1 OS=Arabidopsis thaliana GN=NIP1 PE=1 SV=2	gi|976924809|gb|KVI08741.1| Zinc finger, RING/FYVE/PHD-type [Cynara cardunculus var. scolymus]
TRINITY_DN240_c0_g1	222.948	1493.48	6.69881	0.00145505	0.63513	3271	-	-	-	virNOG12001	S	sp|Q8L7U7|ACDH_ARATH ACD11 homolog protein OS=Arabidopsis thaliana GN=At4g39670 PE=2 SV=1	gi|976920639|gb|KVI05356.1| Glycolipid transfer protein domain-containing protein [Cynara cardunculus var. scolymus]
TRINITY_DN285_c1_g1	307.804	646.315	2.09976	0.0289641	1	1567	GO:0006351	-	PF02365	virNOG05505	S	sp|F4JN35|NTL9_ARATH Protein NTM1-like 9 OS=Arabidopsis thaliana GN=NTL9 PE=1 SV=1	gi|976919679|gb|KVI04532.1| No apical meristem (NAM) protein [Cynara cardunculus var. scolymus]
TRINITY_DN302_c0_g1	188.738	539.393	2.8579	6.20196e-05	0.0697298	1133	GO:0006351	K14516	PF00847	virNOG19226;virNOG22753	K	sp|Q8LDC8|ERF92_ARATH Ethylene-responsive transcription factor 1B OS=Arabidopsis thaliana GN=ERF1B PE=1 SV=2	gi|147854608|emb|CAN78568.1| hypothetical protein VITISV_012060 [Vitis vinifera]
TRINITY_DN407_c4_g1	65.894	545.613	8.28017	0.0212117	1	2897	-	-	PF00069	virNOG12155;virNOG01267;COG0515	T	sp|Q9SCZ4|FERON_ARATH Receptor-like protein kinase FERONIA OS=Arabidopsis thaliana GN=FER PE=1 SV=1	gi|976915652|gb|KVI01540.1| Concanavalin A-like lectin/glucanase, subgroup [Cynara cardunculus var. scolymus]
TRINITY_DN453_c0_g1	166.72	1212.18	7.27079	0.00171097	0.708915	1849	-	K13464	PF06200	virNOG22805;virNOG23606	SK	sp|Q93ZM9|TIF9_ARATH Protein TIFY 9 OS=Arabidopsis thaliana GN=TIFY9 PE=1 SV=1	gi|976908517|gb|KVH95735.1| CO/COL/TOC1, conserved site-containing protein [Cynara cardunculus var. scolymus]
TRINITY_DN468_c0_g1	1421.16	2871.85	2.02077	0.00279846	0.945058	3122	GO:0005388;GO:0043231;GO:0046872;GO:0005516;GO:0005887;GO:0005524;GO:0070588	K01537	PF00690;PF13246;PF00122	NOG00070;virNOG01632	P	sp|O81108|ACA2_ARATH Calcium-transporting ATPase 2, plasma membrane-type OS=Arabidopsis thaliana GN=ACA2 PE=1 SV=1	gi|976904817|gb|KVH92474.1| Calcium-transporting P-type ATPase, N-terminal autoinhibitory domain-containing protein [Cynara cardunculus var. scolymus]
TRINITY_DN468_c1_g4	82.2007	206.436	2.51137	0.0165837	1	848	GO:0070588;GO:0005524;GO:0005887;GO:0005516;GO:0046872;GO:0005388;GO:0043231	K01537	PF00689	NOG00070;virNOG01632	P	sp|Q2QMX9|ACA10_ORYSJ Calcium-transporting ATPase 10, plasma membrane-type OS=Oryza sativa subsp. japonica GN=ACA10 PE=2 SV=1	gi|502160676|ref|XP_004511843.1| PREDICTED: calcium-transporting ATPase 2, plasma membrane-type-like [Cicer arietinum]
TRINITY_DN468_c0_g2	443.37	898.69	2.02695	0.00396239	1	925	GO:0016787;GO:0043167;GO:0000166;GO:0006816;GO:0016020	K01537	PF00689	virNOG30977;virNOG01632	P	sp|O81108|ACA2_ARATH Calcium-transporting ATPase 2, plasma membrane-type OS=Arabidopsis thaliana GN=ACA2 PE=1 SV=1	gi|593787358|ref|XP_007156718.1| hypothetical protein PHAVU_002G011400g [Phaseolus vulgaris] &gt;gi|561030133|gb|ESW28712.1| hypothetical protein PHAVU_002G011400g [Phaseolus vulgaris]
TRINITY_DN469_c2_g1	49.964	108.589	2.17335	0.0203603	1	1604	GO:0016020;GO:0016740	-	-	virNOG03050	S	-	gi|976917186|gb|KVI02673.1| Sulfotransferase domain-containing protein [Cynara cardunculus var. scolymus]
TRINITY_DN509_c0_g1	5.43944	31.1105	5.71943	0.0438673	1	1354	GO:0055114;GO:0051213;GO:0005506	-	PF03171;PF14226	virNOG07799	Q	sp|Q9SRM3|DIOX6_ARATH Probable 2-oxoglutarate-dependent dioxygenase At3g111800 OS=Arabidopsis thaliana GN=At3g11180 PE=2 SV=1	gi|976926077|gb|KVI09954.1| Non-heme dioxygenase N-terminal domain-containing protein [Cynara cardunculus var. scolymus]
TRINITY_DN523_c2_g1	132.276	323.618	2.44655	0.022926	1	686	-	K08770	-	NOG00931;virNOG06759;COG5272	O	sp|Q9FHQ6|UBQ9_ARATH Polyubiquitin 9 OS=Arabidopsis thaliana GN=UBQ9 PE=3 SV=1	gi|1012346567|gb|KYP57759.1| Ubiquitin, partial [Cajanus cajan]
TRINITY_DN527_c1_g1	2.38221	18.4392	7.74038	0.0368475	1	698	GO:0016021;GO:0006355;GO:0016042;GO:0005634;GO:0004435;GO:0004871;GO:0003700;GO:0008270;GO:0035556	K15683	-	virNOG12831	O	sp|Q9FFK8|NFXL2_ARATH NF-X1-type zinc finger protein NFXL2 OS=Arabidopsis thaliana GN=NFXL2 PE=1 SV=2	gi|976926060|gb|KVI09937.1| hypothetical protein Ccrd_011649 [Cynara cardunculus var. scolymus]
TRINITY_DN541_c0_g1	0	495.634	Inf	0.0289352	1	663	-	-	-	-	-	-	-
TRINITY_DN546_c0_g3	30.4413	87.4221	2.87182	0.0059824	1	1308	-	-	-	-	-	-	gi|731345647|ref|XP_010684028.1| PREDICTED: formin-1-like [Beta vulgaris subsp. vulgaris]
TRINITY_DN601_c0_g2	40.6368	110.738	2.72508	0.0346716	1	601	-	-	-	-	-	-	-
TRINITY_DN626_c4_g1	61.0096	274.268	4.49548	0.00240327	0.855314	1168	-	-	-	-	-	-	-
TRINITY_DN636_c0_g1	274.531	965.68	3.51756	6.26546e-07	0.00165814	2625	-	-	PF00069	virNOG01267;virNOG12155;COG0515	T	sp|Q8VYA3|WAKLJ_ARATH Wall-associated receptor kinase-like 10 OS=Arabidopsis thaliana GN=WAKL10 PE=2 SV=1	gi|747094408|ref|XP_011095036.1| PREDICTED: wall-associated receptor kinase 2-like [Sesamum indicum]
TRINITY_DN644_c0_g1	29.9084	121.5	4.06242	0.0142301	1	1929	GO:0016021	-	PF00168	virNOG04239	R	-	gi|658010428|ref|XP_008340461.1| PREDICTED: synaptotagmin-3-like [Malus domestica]
TRINITY_DN679_c0_g1	871.82	2400.43	2.75335	0.00123227	0.569189	3100	GO:0006952	-	PF07231;PF07014	virNOG09105	S	sp|O04203|HSPR2_ARATH Nematode resistance protein-like HSPRO2 OS=Arabidopsis thaliana GN=HSPRO2 PE=1 SV=1	gi|976926034|gb|KVI09912.1| Hs1pro-1, C-terminal [Cynara cardunculus var. scolymus]
TRINITY_DN679_c4_g1	1762.98	4896.94	2.77764	0.0146267	1	1765	GO:0006952	-	PF07231;PF07014	virNOG09105	S	sp|O04203|HSPR2_ARATH Nematode resistance protein-like HSPRO2 OS=Arabidopsis thaliana GN=HSPRO2 PE=1 SV=1	gi|976926034|gb|KVI09912.1| Hs1pro-1, C-terminal [Cynara cardunculus var. scolymus]
TRINITY_DN688_c0_g3	0	871.839	Inf	0.0219054	1	882	-	-	-	-	-	-	-
TRINITY_DN695_c0_g1	851.836	3138.94	3.68491	0.007799	1	1443	GO:0016787	K07766	PF00293	virNOG29968	L	sp|Q9ZU95|NUD17_ARATH Nudix hydrolase 17, mitochondrial OS=Arabidopsis thaliana GN=NUDT17 PE=2 SV=1	gi|976917716|gb|KVI03107.1| NUDIX hydrolase, conserved site-containing protein [Cynara cardunculus var. scolymus]
TRINITY_DN701_c4_g1	189.368	458.893	2.42328	0.00822223	1	2459	-	-	-	virNOG25585;virNOG24082	S	-	gi|976918332|gb|KVI03520.1| hypothetical protein Ccrd_018191 [Cynara cardunculus var. scolymus]
TRINITY_DN701_c0_g1	0	187.815	Inf	0.0471807	1	5627	-	-	-	virNOG33673;virNOG00819;KOG0017;virNOG19602	R	sp|P10978|POLX_TOBAC Retrovirus-related Pol polyprotein from transposon TNT 1-94 OS=Nicotiana tabacum PE=2 SV=1	gi|171191043|gb|ACB45081.1| putative polyprotein [Solanum habrochaites]
TRINITY_DN716_c2_g1	146.359	413.989	2.82857	0.0100835	1	1197	-	-	-	virNOG05888	S	-	gi|976909557|gb|KVH96655.1| Protein of unknown function DUF1421 [Cynara cardunculus var. scolymus]
TRINITY_DN734_c0_g1	2641.3	6414.91	2.4287	0.00015089	0.133295	3188	GO:0016021	-	-	virNOG00574	S	sp|Q8S8Q6|TET8_ARATH Tetraspanin-8 OS=Arabidopsis thaliana GN=TET8 PE=2 SV=1	gi|976928872|gb|KVI11758.1| hypothetical protein Ccrd_009832 [Cynara cardunculus var. scolymus]
TRINITY_DN808_c1_g1	200.377	575.526	2.87222	0.00552626	1	1168	-	-	-	virNOG17932;virNOG04659	R	-	gi|976927256|gb|KVI11039.1| Glyoxalase-like domain-containing protein [Cynara cardunculus var. scolymus]
TRINITY_DN841_c1_g1	234.026	582.411	2.48866	0.0285084	1	1899	-	-	PF01657	COG0515;NOG143676;virNOG05235	ST	sp|O81833|SD11_ARATH G-type lectin S-receptor-like serine/threonine-protein kinase SD1-1 OS=Arabidopsis thaliana GN=SD11 PE=1 SV=1	gi|976900044|gb|KVH88333.1| Concanavalin A-like lectin/glucanase, subgroup [Cynara cardunculus var. scolymus]
TRINITY_DN841_c1_g2	1784.58	4528.65	2.53766	9.70503e-05	0.0947582	958	GO:0006950	-	-	virNOG24779;virNOG26308;virNOG23080	S	sp|Q93WF6|SAG21_ARATH Protein SENESCENCE-ASSOCIATED GENE 21, mitochondrial OS=Arabidopsis thaliana GN=SAG21 PE=2 SV=1	gi|976929619|gb|KVI12461.1| hypothetical protein Ccrd_009081 [Cynara cardunculus var. scolymus]
TRINITY_DN844_c1_g1	51.3035	1281.95	24.9877	2.40536e-10	4.46224e-06	1196	-	-	PF00847	virNOG21587	K	sp|Q9SZ06|EF109_ARATH Ethylene-responsive transcription factor ERF109 OS=Arabidopsis thaliana GN=ERF109 PE=1 SV=1	gi|976916439|gb|KVI01950.1| AP2/ERF domain-containing protein [Cynara cardunculus var. scolymus]
TRINITY_DN870_c0_g1	766.85	2133.63	2.78233	8.28282e-05	0.0878038	2690	-	K19366	PF06911	virNOG07350	S	sp|O48832|ERD7_ARATH Protein EARLY-RESPONSIVE TO DEHYDRATION 7, chloroplastic OS=Arabidopsis thaliana GN=ERD7 PE=1 SV=1	gi|976918941|gb|KVI04092.1| Senescence/spartin-associated [Cynara cardunculus var. scolymus]
TRINITY_DN874_c0_g1	1670.67	4043.43	2.42024	0.00813513	1	1869	GO:0008198;GO:0008270;GO:0055114;GO:0006725;GO:0016701;GO:0051213	K15777	PF02900	virNOG08916	S	sp|Q70FG7|DODA_BETVU 4,5-DOPA dioxygenase extradiol OS=Beta vulgaris GN=DODA PE=1 SV=1	gi|976853133|gb|KVH43382.1| Extradiol aromatic ring-opening dioxygenase, DODA type [Cynara cardunculus var. scolymus]
TRINITY_DN906_c0_g1	106.237	242.767	2.28515	0.00411206	1	2310	-	-	PF05705	virNOG07016	S	sp|Q6DHN0|TMM53_DANRE Transmembrane protein 53 OS=Danio rerio GN=tmem53 PE=2 SV=1	gi|976908572|gb|KVH95788.1| Protein of unknown function DUF829, TMEM53, partial [Cynara cardunculus var. scolymus]
TRINITY_DN931_c0_g1	909.61	3524.66	3.87492	0.000241457	0.186639	3913	GO:0004722;GO:0006470	-	-	virNOG01867	T	sp|Q9S9Z7|P2C10_ARATH Probable protein phosphatase 2C 10 OS=Arabidopsis thaliana GN=At1g34750 PE=2 SV=1	gi|976809519|gb|KVH00721.1| Protein phosphatase 2C [Cynara cardunculus var. scolymus]
TRINITY_DN952_c1_g1	12.6823	340.656	26.8606	1.66155e-21	1.23296e-16	1721	GO:0009507;GO:0016853	K10525	PF06351	virNOG09346	R	sp|A2XID3|AOC_ORYSI Allene oxide cyclase, chloroplastic OS=Oryza sativa subsp. indica GN=AOC PE=2 SV=1	gi|976917352|gb|KVI02819.1| Allene oxide cyclase [Cynara cardunculus var. scolymus]
TRINITY_DN969_c1_g1	16.1685	196.815	12.1727	0.0201122	1	1485	-	-	PF14299	virNOG33113;virNOG15018	R	sp|O80494|P2B15_ARATH F-box protein PP2-B15 OS=Arabidopsis thaliana GN=PP2B15 PE=2 SV=2	gi|976916109|gb|KVI01697.1| F-box domain, cyclin-like protein [Cynara cardunculus var. scolymus]
TRINITY_DN971_c1_g1	0.332312	10.1074	30.4153	0.016193	1	967	-	-	-	-	-	-	-
TRINITY_DN976_c1_g1	44.362	120.219	2.70996	0.0199867	1	1074	-	-	PF05910	virNOG00375	S	-	gi|976925331|gb|KVI09240.1| Protein of unknown function DUF868, plant [Cynara cardunculus var. scolymus]
TRINITY_DN1021_c0_g1	112.221	454.415	4.04929	0.00888417	1	1322	GO:0050662;GO:0016021;GO:0050379;GO:0005975	K08679	PF01370	virNOG04514	G	sp|Q9M0B6|GAE1_ARATH UDP-glucuronate 4-epimerase 1 OS=Arabidopsis thaliana GN=GAE1 PE=1 SV=1	gi|976915418|gb|KVI01369.1| NAD-dependent epimerase/dehydratase [Cynara cardunculus var. scolymus]
TRINITY_DN1033_c5_g1	128.655	277.949	2.16042	0.0052373	1	2184	-	-	-	virNOG03463;KOG2966	S	-	gi|976918582|gb|KVI03755.1| Coiled-coil domain containing protein 109, C-terminal [Cynara cardunculus var. scolymus]
TRINITY_DN1089_c0_g2	0	298.834	Inf	0.0371268	1	1608	-	-	PF13976	virNOG31300;NOG215611;virNOG33673	R	-	gi|344178892|dbj|BAK64102.1| gag-pol polyprotein [Eustoma exaltatum subsp. russellianum]
TRINITY_DN1108_c0_g1	30.8842	98.3603	3.18481	0.0026071	0.904019	1536	-	K00913	PF05770	virNOG00437	T	sp|Q84Y01|ITPK1_MAIZE Inositol-tetrakisphosphate 1-kinase 1 OS=Zea mays GN=ITPK1 PE=2 SV=1	gi|1021049630|gb|KZN07410.1| hypothetical protein DCAR_008247 [Daucus carota subsp. sativus]
TRINITY_DN1117_c2_g1	167.308	634.915	3.79488	0.00382905	1	1923	GO:1901363;GO:0097159	-	-	virNOG08336	R	sp|Q9LFD5|BPA1_ARATH Binding partner of ACD11 1 OS=Arabidopsis thaliana GN=BPA1 PE=1 SV=1	gi|976907908|gb|KVH95146.1| Nucleotide-binding, alpha-beta plait [Cynara cardunculus var. scolymus]
TRINITY_DN1134_c1_g1	1.34669	26.649	19.7884	0.0431966	1	1414	-	K00021	-	virNOG07933	I	sp|P14891|HMDH1_ARATH 3-hydroxy-3-methylglutaryl-coenzyme A reductase 1 OS=Arabidopsis thaliana GN=HMG1 PE=1 SV=1	gi|743804882|ref|XP_010927300.1| PREDICTED: 3-hydroxy-3-methylglutaryl-coenzyme A reductase 3-like [Elaeis guineensis]
TRINITY_DN1165_c2_g1	57.7025	162.113	2.80946	0.0312075	1	413	-	-	-	-	-	-	-
TRINITY_DN1202_c1_g1	124.742	273.482	2.19238	0.00535521	1	2528	-	-	-	-	-	-	-
TRINITY_DN1214_c0_g2	155.886	1033.89	6.63231	0.000236081	0.184404	1250	-	-	-	virNOG00701	R	sp|Q9ZPE7|EXO_ARATH Protein EXORDIUM OS=Arabidopsis thaliana GN=EXO PE=2 SV=1	gi|255545766|ref|XP_002513943.1| PREDICTED: protein EXORDIUM [Ricinus communis] &gt;gi|223547029|gb|EEF48526.1| conserved hypothetical protein [Ricinus communis]
TRINITY_DN1223_c0_g1	244.074	842.764	3.45291	0.00509828	1	2705	GO:0004722;GO:0046872;GO:0006470	-	-	virNOG07063;KOG0700	T	sp|Q2QN36|P2C78_ORYSJ Probable protein phosphatase 2C 78 OS=Oryza sativa subsp. japonica GN=Os12g0580900 PE=2 SV=1	gi|976905712|gb|KVH93331.1| hypothetical protein Ccrd_004617 [Cynara cardunculus var. scolymus]
TRINITY_DN1228_c1_g1	1960.55	4826.5	2.4618	0.000145305	0.131492	2853	-	K13448	PF13499	virNOG17909;virNOG20786	T	sp|Q0DJV6|CML18_ORYSJ Probable calcium-binding protein CML18 OS=Oryza sativa subsp. japonica GN=CML18 PE=2 SV=1	gi|976904730|gb|KVH92390.1| Calcium-binding EF-hand [Cynara cardunculus var. scolymus]
TRINITY_DN1248_c0_g1	777.948	2231	2.8678	0.00217257	0.81409	2330	-	K09843	PF00067	virNOG01723	Q	sp|Q949P1|ABAH1_ARATH Abscisic acid 8&apos;-hydroxylase 1 OS=Arabidopsis thaliana GN=CYP707A1 PE=2 SV=1	gi|976907933|gb|KVH95171.1| cytochrome P450 [Cynara cardunculus var. scolymus]
TRINITY_DN1282_c1_g2	1005.49	2449.66	2.4363	0.000172344	0.148153	2852	GO:0005622;GO:0007034	K12191	-	virNOG00722	U	sp|Q9SKI2|VPS2A_ARATH Vacuolar protein sorting-associated protein 2 homolog 1 OS=Arabidopsis thaliana GN=VPS2.1 PE=1 SV=2	gi|922390169|ref|XP_013463507.1| charged multivesicular body protein [Medicago truncatula] &gt;gi|217071526|gb|ACJ84123.1| unknown [Medicago truncatula] &gt;gi|388500940|gb|AFK38536.1| unknown [Medicago truncatula] &gt;gi|657397898|gb|KEH37542.1| charged multivesicular body protein [Medicago truncatula]
TRINITY_DN1282_c7_g1	49.8105	121.428	2.4378	0.0229211	1	1395	GO:0006351	K09286	-	virNOG20840	K	sp|O22259|ERF71_ARATH Ethylene-responsive transcription factor ERF071 OS=Arabidopsis thaliana GN=ERF071 PE=2 SV=1	gi|697109422|ref|XP_009608570.1| PREDICTED: ethylene-responsive transcription factor ERF071 [Nicotiana tomentosiformis]
TRINITY_DN1328_c2_g2	279.584	634.085	2.26796	0.00250585	0.881262	1923	GO:0004674;GO:0006468;GO:0005524	-	PF07714	virNOG12702	T	sp|Q9SII6|PIX13_ARATH Probable serine/threonine-protein kinase PIX13 OS=Arabidopsis thaliana GN=PIX13 PE=1 SV=2	gi|976923370|gb|KVI07705.1| Concanavalin A-like lectin/glucanase, subgroup [Cynara cardunculus var. scolymus]
TRINITY_DN1362_c3_g1	5.13531	22.2372	4.33026	0.0336769	1	1004	-	-	-	-	-	-	-
TRINITY_DN1393_c0_g1	6.15472	23.379	3.79854	0.0385517	1	670	-	-	-	-	-	-	-
TRINITY_DN1430_c0_g1	2038.86	4171.44	2.04596	0.0032944	1	2511	-	-	PF12481	virNOG03145	S	sp|P24805|TSJT1_TOBAC Stem-specific protein TSJT1 OS=Nicotiana tabacum GN=TSJT1 PE=2 SV=1	gi|976915678|gb|KVI01552.1| protein of unknown function DUF3700 [Cynara cardunculus var. scolymus]
TRINITY_DN1439_c0_g1	90.8729	391.22	4.30514	1.85784e-07	0.000624965	1437	GO:0006888;GO:0005789;GO:0007264;GO:0005829;GO:0005886;GO:0015031;GO:0000139;GO:0009860;GO:0009555;GO:0005773;GO:0009506;GO:0005525	K07874	-	virNOG05410	U	sp|Q9SEH3|RAD2C_ARATH Ras-related protein RABD2c OS=Arabidopsis thaliana GN=RABD2C PE=1 SV=1	gi|976904237|gb|KVH91972.1| Ran GTPase [Cynara cardunculus var. scolymus]
TRINITY_DN1474_c0_g1	1277.49	4228.34	3.30987	0.00019641	0.16194	3631	-	-	PF10539	virNOG03951;virNOG40565	S	sp|P37707|B2_DAUCA B2 protein OS=Daucus carota PE=2 SV=1	gi|604303961|gb|EYU23311.1| hypothetical protein MIMGU_mgv1a010649mg [Erythranthe guttata]
TRINITY_DN1474_c1_g1	84.8039	326.854	3.85423	0.00976088	1	2391	-	-	-	virNOG03951;virNOG40565	S	sp|P37707|B2_DAUCA B2 protein OS=Daucus carota PE=2 SV=1	gi|848911307|ref|XP_012854103.1| PREDICTED: B2 protein [Erythranthe guttata]
TRINITY_DN1483_c0_g1	308.698	712.316	2.30749	0.00438908	1	2621	GO:0004565;GO:0005975	-	PF01301	virNOG30198;virNOG15996	G	sp|P48981|BGAL_MALDO Beta-galactosidase OS=Malus domestica PE=1 SV=1	gi|976906541|gb|KVH93961.1| Galactose-binding domain-like protein [Cynara cardunculus var. scolymus]
TRINITY_DN1522_c0_g1	142.224	1607.63	11.3035	0.00030066	0.223062	1170	-	K13464	PF06200;PF09425	virNOG10152;virNOG34772	S	sp|Q9LMA8|TI10A_ARATH Protein TIFY 10A OS=Arabidopsis thaliana GN=TIFY10A PE=1 SV=1	gi|756179523|gb|AJK93412.1| ZIM-domain protein 1 [Artemisia annua]
TRINITY_DN1562_c0_g1	227.963	631.758	2.77132	0.00482892	1	3824	GO:0005509	-	PF13833	virNOG21263	DZ	sp|Q9LSQ6|PBP1_ARATH Calcium-binding protein PBP1 OS=Arabidopsis thaliana GN=PBP1 PE=1 SV=1	gi|118484952|gb|ABK94341.1| unknown [Populus trichocarpa] &gt;gi|118485777|gb|ABK94737.1| unknown [Populus trichocarpa]
TRINITY_DN1562_c0_g3	470.757	1881.79	3.99736	2.11455e-08	0.000130758	2324	GO:0005509	-	PF13833	virNOG21263	ZD	sp|Q9LSQ6|PBP1_ARATH Calcium-binding protein PBP1 OS=Arabidopsis thaliana GN=PBP1 PE=1 SV=1	gi|976916714|gb|KVI02215.1| Calcium-binding EF-hand [Cynara cardunculus var. scolymus]
TRINITY_DN1562_c0_g4	312.281	1238.08	3.96464	0.000408605	0.264866	947	GO:0005509	K10840	PF13833	virNOG21263	DZ	sp|Q9LSQ6|PBP1_ARATH Calcium-binding protein PBP1 OS=Arabidopsis thaliana GN=PBP1 PE=1 SV=1	gi|970059413|ref|XP_015056439.1| PREDICTED: calcium-binding protein PBP1-like [Solanum pennellii]
TRINITY_DN1579_c1_g1	283.919	781.663	2.75312	0.0245331	1	1893	GO:0004190;GO:0006508	-	PF14543;PF14541	virNOG11392	O	sp|Q9LNJ3|APF2_ARATH Aspartyl protease family protein 2 OS=Arabidopsis thaliana GN=APF2 PE=2 SV=1	gi|976908584|gb|KVH95800.1| Aspartic peptidase [Cynara cardunculus var. scolymus]
TRINITY_DN1592_c1_g1	14.583	40	2.74293	0.04097	1	524	-	-	-	-	-	-	-
TRINITY_DN1630_c2_g1	271.68	1086.17	3.998	5.06339e-08	0.000221017	2684	-	-	-	virNOG03831	S	-	gi|976926225|gb|KVI10095.1| Ribonuclease H-like domain-containing protein, partial [Cynara cardunculus var. scolymus]
TRINITY_DN1638_c1_g1	211.589	814.503	3.84946	0.00180836	0.737306	2285	-	-	PF00412	virNOG02561	TZ	sp|P0C7Q8|DA1_ARATH Protein DA1 OS=Arabidopsis thaliana GN=DA1 PE=1 SV=1	gi|460385048|ref|XP_004238217.1| PREDICTED: protein DA1 isoform X2 [Solanum lycopersicum]
TRINITY_DN1640_c0_g1	187.538	751.19	4.00554	0.0030408	0.989659	1661	-	-	PF07911	virNOG20655	S	-	gi|976921164|gb|KVI05865.1| Protein of unknown function DUF1677, plant [Cynara cardunculus var. scolymus]
TRINITY_DN1766_c1_g1	197.44	440.553	2.23133	0.00207439	0.796761	475	-	-	-	-	-	-	-
TRINITY_DN1839_c0_g1	413.693	1234.9	2.98507	0.000368279	0.248989	3429	GO:0016021	-	PF01169	virNOG04611	S	sp|A2YXC7|GDT14_ORYSI GDT1-like protein 4 OS=Oryza sativa subsp. indica GN=OsI_29993 PE=3 SV=1	gi|976919607|gb|KVI04484.1| hypothetical protein Ccrd_017196 [Cynara cardunculus var. scolymus]
TRINITY_DN1849_c1_g1	126.764	323.319	2.55055	0.000712429	0.388719	1583	GO:0019430;GO:0004784;GO:0043085;GO:0016532;GO:0030001;GO:0055114;GO:0009570;GO:0008270	K04569	PF00403;PF00080	virNOG00622	P	sp|Q9LD47|CCS_ARATH Copper chaperone for superoxide dismutase, chloroplastic/cytosolic OS=Arabidopsis thaliana GN=CCS PE=1 SV=1	gi|976902162|gb|KVH90120.1| Heavy metal-associated domain, HMA [Cynara cardunculus var. scolymus]
TRINITY_DN1851_c1_g1	88.8177	863.086	9.7175	0.00142216	0.624446	989	GO:0006351	K09286	PF00847	virNOG17335;virNOG10158	K	sp|Q9FJ93|DRE1D_ARATH Dehydration-responsive element-binding protein 1D OS=Arabidopsis thaliana GN=DREB1D PE=2 SV=1	gi|255076655|gb|ACU00263.1| dehydration-responsive element-binding factor 1 [Chrysanthemum x morifolium]
TRINITY_DN1851_c0_g1	17.4971	585.526	33.4642	5.93918e-06	0.0107492	1419	GO:0006355;GO:0003677;GO:0003700;GO:0005634	K09286	PF00847	virNOG10158;virNOG17335	K	sp|Q9FJ93|DRE1D_ARATH Dehydration-responsive element-binding protein 1D OS=Arabidopsis thaliana GN=DREB1D PE=2 SV=1	gi|294335527|gb|ADE62311.1| dehydration-responsive element-binding protein 1A [Ageratina adenophora]
TRINITY_DN1851_c0_g2	21.2243	1131.38	53.3057	0.000173699	0.148153	1144	GO:0003700;GO:0003677;GO:0006355;GO:0005634	K09286	PF00847	virNOG17335;virNOG10158	K	sp|Q9FJ93|DRE1D_ARATH Dehydration-responsive element-binding protein 1D OS=Arabidopsis thaliana GN=DREB1D PE=2 SV=1	gi|294335527|gb|ADE62311.1| dehydration-responsive element-binding protein 1A [Ageratina adenophora]
TRINITY_DN1853_c5_g1	68.5664	194.407	2.83532	0.000543796	0.325423	2279	-	-	-	virNOG27601;virNOG02085	R	sp|O49508|FB237_ARATH F-box protein At4g18380 OS=Arabidopsis thaliana GN=At4g18380 PE=2 SV=1	gi|297740746|emb|CBI30928.3| unnamed protein product [Vitis vinifera]
TRINITY_DN1857_c0_g1	264.621	563.414	2.12914	0.0358687	1	2814	-	-	-	virNOG04675	S	sp|Q9SRE5|Y1666_ARATH Uncharacterized protein At1g76660 OS=Arabidopsis thaliana GN=At1g76660 PE=2 SV=1	gi|976902132|gb|KVH90090.1| hypothetical protein Ccrd_007890 [Cynara cardunculus var. scolymus]
TRINITY_DN1877_c1_g1	269.037	595.088	2.21192	0.00450944	1	2977	-	-	PF07173	virNOG00186;NOG29653	S	sp|Q9ZQ47|GRDP1_ARATH Glycine-rich domain-containing protein 1 OS=Arabidopsis thaliana GN=GRDP1 PE=2 SV=1	gi|1035903926|gb|OAY33525.1| hypothetical protein MANES_13G104100 [Manihot esculenta]
TRINITY_DN1895_c2_g1	684.573	3254.45	4.75399	1.01026e-07	0.000394558	1446	-	-	-	virNOG23809	S	sp|Q39096|ERD15_ARATH Protein EARLY RESPONSIVE TO DEHYDRATION 15 OS=Arabidopsis thaliana GN=ERD15 PE=1 SV=1	gi|976918283|gb|KVI03473.1| Ataxin-2, C-terminal [Cynara cardunculus var. scolymus]
TRINITY_DN1913_c0_g1	171.582	549.319	3.20149	0.0455802	1	1150	-	-	-	virNOG19669	S	-	gi|976920598|gb|KVI05318.1| hypothetical protein Ccrd_016359 [Cynara cardunculus var. scolymus]
TRINITY_DN1926_c0_g2	193.988	432.863	2.23139	0.00211505	0.803373	2328	GO:0005524;GO:0006468;GO:0004672;GO:0030246	-	PF00069	virNOG07148	T	sp|C0LGH3|Y5614_ARATH Probable LRR receptor-like serine/threonine-protein kinase At1g56140 OS=Arabidopsis thaliana GN=At1g56140 PE=2 SV=2	gi|976909022|gb|KVH96209.1| Concanavalin A-like lectin/glucanase, subgroup [Cynara cardunculus var. scolymus]
TRINITY_DN1953_c0_g1	455.619	1382.58	3.0345	0.0220602	1	2803	GO:0016740;GO:0016021	-	PF13641	virNOG02091	R	sp|Q9LJP4|CSLC4_ARATH Xyloglucan glycosyltransferase 4 OS=Arabidopsis thaliana GN=CSLC4 PE=1 SV=1	gi|976905109|gb|KVH92755.1| hypothetical protein Ccrd_005197 [Cynara cardunculus var. scolymus]
TRINITY_DN1959_c1_g1	0	7.80562	Inf	0.0399867	1	488	-	-	-	-	-	-	-
TRINITY_DN1977_c1_g1	25.5336	87.5456	3.42864	0.00311629	1	732	-	-	-	-	-	-	-
TRINITY_DN1986_c2_g1	10.4781	83.2628	7.94634	1.99935e-05	0.0285311	787	-	-	-	-	-	-	-
TRINITY_DN2034_c0_g3	208.265	429.339	2.0615	0.00549866	1	2287	GO:0016301;GO:0016310	-	PF00454	virNOG00334	O	sp|Q9ZPY9|P4KG4_ARATH Phosphatidylinositol 4-kinase gamma 4 OS=Arabidopsis thaliana GN=PI4KG4 PE=1 SV=1	gi|976900868|gb|KVH89029.1| Phosphatidylinositol 3-/4-kinase, catalytic domain-containing protein [Cynara cardunculus var. scolymus]
TRINITY_DN2053_c0_g1	46.1375	166.235	3.60304	0.00314211	1	769	-	-	-	virNOG27071	S	-	gi|976922448|gb|KVI06853.1| hypothetical protein Ccrd_014791 [Cynara cardunculus var. scolymus]
TRINITY_DN2071_c3_g2	4.15414	19.3675	4.66222	0.0325242	1	571	-	-	-	-	-	-	-
TRINITY_DN2112_c0_g4	95.937	328.579	3.42494	1.44696e-05	0.0223691	1652	-	K09422	PF00249	virNOG09221;COG5147	K	sp|Q9FDW1|MYB44_ARATH Transcription factor MYB44 OS=Arabidopsis thaliana GN=MYB44 PE=1 SV=1	gi|976926972|gb|KVI10810.1| Homeodomain-like protein [Cynara cardunculus var. scolymus]
TRINITY_DN2123_c4_g1	0.682069	9.36217	13.7261	0.044164	1	894	-	-	-	-	-	-	-
TRINITY_DN2142_c0_g3	0	782.446	Inf	0.0230985	1	13696	-	-	PF00665;PF07727;PF13976	virNOG10663	R	sp|P10978|POLX_TOBAC Retrovirus-related Pol polyprotein from transposon TNT 1-94 OS=Nicotiana tabacum PE=2 SV=1	gi|923805335|ref|XP_013688817.1| PREDICTED: uncharacterized protein LOC106392554, partial [Brassica napus]
TRINITY_DN2186_c0_g1	2097.03	5868.82	2.79863	0.00917354	1	2238	-	-	-	virNOG06548	K	sp|Q9SAH7|WRK40_ARATH Probable WRKY transcription factor 40 OS=Arabidopsis thaliana GN=WRKY40 PE=1 SV=1	gi|524908120|gb|AGR40499.1| WRKY3 transcription factor [Artemisia annua]
TRINITY_DN2335_c0_g1	1255.96	4110.35	3.27268	7.63206e-07	0.00182689	2118	GO:0003700;GO:0043565;GO:0006355	K13424	PF03106	virNOG04752	K	sp|Q6IEQ7|WRK24_ORYSJ WRKY transcription factor WRKY24 OS=Oryza sativa subsp. japonica GN=WRKY24 PE=2 SV=1	gi|749317779|gb|AJF11718.1| WRKY33 [Chrysanthemum x morifolium]
TRINITY_DN2338_c0_g1	614.745	2069.18	3.36591	2.25971e-06	0.00453193	3073	-	-	-	virNOG09269;virNOG12940	S	sp|Q9M325|IPCS1_ARATH Phosphatidylinositol:ceramide inositolphosphotransferase 1 OS=Arabidopsis thaliana GN=IPCS1 PE=2 SV=1	gi|388511959|gb|AFK44041.1| unknown [Lotus japonicus]
TRINITY_DN2367_c0_g1	230.113	1285.48	5.5863	8.15143e-06	0.0137472	1886	GO:0003743;GO:0006413;GO:0006952	-	-	virNOG17687	S	sp|Q9ZVI6|LOR8_ARATH Protein LURP-one-related 8 OS=Arabidopsis thaliana GN=At2g38640 PE=2 SV=1	gi|976907766|gb|KVH95036.1| Initiation factor 2B-related protein [Cynara cardunculus var. scolymus]
TRINITY_DN2388_c0_g1	1464.51	3268.84	2.23203	0.00061872	0.35216	2890	GO:0005634;GO:0016021;GO:0003677;GO:0006355	-	-	virNOG05505;virNOG07258	S	sp|B5X570|NAC14_ARATH NAC domain-containing protein 14 OS=Arabidopsis thaliana GN=NAC014 PE=2 SV=1	gi|976919679|gb|KVI04532.1| No apical meristem (NAM) protein [Cynara cardunculus var. scolymus]
TRINITY_DN2389_c0_g1	406.251	864.811	2.12876	0.00226782	0.828982	2340	GO:0016151;GO:0006807	K03188	PF01730	virNOG05514	S	sp|Q9XHZ3|UREF_ARATH Urease accessory protein F OS=Arabidopsis thaliana GN=UREF PE=2 SV=1	gi|976914890|gb|KVI00907.1| Urease accessory protein UreF [Cynara cardunculus var. scolymus]
TRINITY_DN2450_c3_g1	116.923	391.43	3.34776	1.03481e-05	0.0163378	1451	-	-	-	-	-	-	gi|922370287|ref|XP_013457307.1| ethylene-responsive nuclear-like protein, putative [Medicago truncatula] &gt;gi|657389682|gb|KEH31338.1| ethylene-responsive nuclear-like protein, putative [Medicago truncatula]
TRINITY_DN2474_c0_g1	46.6001	2298.83	49.3309	0.00872473	1	1337	GO:0005618;GO:0004553;GO:0048046;GO:0071555;GO:0010411;GO:0042546;GO:0016762	K08235	PF00722	virNOG39332;NOG129657;COG2273	SRG	sp|Q38911|XTH15_ARATH Xyloglucan endotransglucosylase/hydrolase protein 15 OS=Arabidopsis thaliana GN=XTH15 PE=1 SV=1	gi|47115349|emb|CAE12269.1| putative xyloglucan endotransglucosylase / hydrolase [Lactuca sativa]
TRINITY_DN2476_c0_g1	426.864	1920.21	4.49841	0.0265222	1	2336	-	K04125	PF14226	virNOG07456	Q	sp|Q9SQ80|G2OX1_PEA Gibberellin 2-beta-dioxygenase 1 OS=Pisum sativum GN=GA2OX1 PE=1 SV=1	gi|213032421|emb|CAS03784.1| gibberellin 2-oxidase1 [Helianthus annuus] &gt;gi|213032423|emb|CAS03785.1| gibberellin 2-oxidase1 [Helianthus annuus]
TRINITY_DN2477_c1_g1	20.5902	79.459	3.85907	0.0106431	1	601	-	-	-	-	-	-	-
TRINITY_DN2498_c0_g1	423.366	983.799	2.32375	0.0215981	1	2545	GO:0008270	-	-	virNOG37859;virNOG19651	O	-	gi|976900503|gb|KVH88692.1| Zinc finger, RING/FYVE/PHD-type [Cynara cardunculus var. scolymus]
TRINITY_DN2547_c0_g2	4.7661	21.6078	4.53364	0.0293279	1	1209	GO:0003677;GO:0006351	-	PF13837	virNOG17021	K	sp|Q9SDW0|TGT3A_ARATH Trihelix transcription factor GT-3a OS=Arabidopsis thaliana GN=GT-3A PE=1 SV=1	gi|976928474|gb|KVI11438.1| Myb-like domain-containing protein [Cynara cardunculus var. scolymus]
TRINITY_DN2558_c0_g1	539.941	1128.72	2.09045	0.013144	1	1928	GO:0016021;GO:0016757	K08238	PF05637	virNOG03554	GM	sp|O22775|XXT2_ARATH Xyloglucan 6-xylosyltransferase 2 OS=Arabidopsis thaliana GN=XXT2 PE=1 SV=1	gi|976903809|gb|KVH91573.1| Galactosyl transferase [Cynara cardunculus var. scolymus]
TRINITY_DN2558_c0_g2	35.2633	242.2	6.86833	0.0051421	1	800	GO:0016757;GO:0016021	K08238	PF05637	virNOG03554	GM	sp|O22775|XXT2_ARATH Xyloglucan 6-xylosyltransferase 2 OS=Arabidopsis thaliana GN=XXT2 PE=1 SV=1	gi|976903809|gb|KVH91573.1| Galactosyl transferase [Cynara cardunculus var. scolymus]
TRINITY_DN2698_c0_g2	6.5189	55.5585	8.52268	0.0391605	1	1392	GO:0016021;GO:0022891;GO:0055085	-	-	virNOG33541;NOG122331;virNOG03759	GR	sp|Q8GW61|STP14_ARATH Sugar transport protein 14 OS=Arabidopsis thaliana GN=STP14 PE=2 SV=2	gi|848890872|ref|XP_012845560.1| PREDICTED: sugar transport protein 14 [Erythranthe guttata] &gt;gi|604319535|gb|EYU30727.1| hypothetical protein MIMGU_mgv1a004665mg [Erythranthe guttata]
TRINITY_DN2708_c0_g2	215.385	635.825	2.95204	0.0464831	1	1879	GO:0005634;GO:0046983;GO:0003700;GO:0003677;GO:0006355	K09264	PF00319;PF01486	virNOG01690;virNOG13194	K	sp|Q41274|AGL8_SINAL Agamous-like MADS-box protein AGL8 homolog OS=Sinapis alba GN=AGL8 PE=2 SV=1	gi|283476348|emb|CAX65663.1| GSQUA5 protein [Gerbera hybrid cultivar]
TRINITY_DN2726_c0_g1	16.654	58.9814	3.54157	0.0172703	1	781	-	-	-	-	-	-	-
TRINITY_DN2785_c0_g1	1599.37	4081.8	2.55213	7.86839e-05	0.0846194	2003	GO:0016020;GO:0046872	-	PF13639	virNOG18724	O	sp|Q8L9T5|ATL2_ARATH RING-H2 finger protein ATL2 OS=Arabidopsis thaliana GN=ATL2 PE=2 SV=2	gi|976903956|gb|KVH91705.1| Zinc finger, RING/FYVE/PHD-type [Cynara cardunculus var. scolymus]
TRINITY_DN2879_c1_g1	13.532	38.2869	2.82936	0.0363061	1	1767	-	-	-	-	-	-	-
TRINITY_DN2896_c0_g1	214.992	774.362	3.60183	0.00061819	0.35216	2874	-	-	PF06943;PF00656	virNOG10982	OD	sp|Q7XJE6|MCA1_ARATH Metacaspase-1 OS=Arabidopsis thaliana GN=AMC1 PE=1 SV=1	gi|720044332|ref|XP_010269857.1| PREDICTED: metacaspase-1-like [Nelumbo nucifera]
TRINITY_DN2994_c0_g1	16.6926	52.6599	3.15469	0.0106235	1	540	GO:0055114;GO:0003979;GO:0051287	K00012	PF03721	virNOG12190	G	sp|Q2QS13|UGDH5_ORYSJ UDP-glucose 6-dehydrogenase 5 OS=Oryza sativa subsp. japonica GN=UGD5 PE=2 SV=1	gi|388494590|gb|AFK35361.1| unknown [Medicago truncatula]
TRINITY_DN3000_c3_g1	0	11.565	Inf	0.0102903	1	2806	-	-	-	-	-	-	gi|1012321186|gb|KYP33753.1| hypothetical protein KK1_045364 [Cajanus cajan]
TRINITY_DN3068_c0_g1	318.818	900.744	2.82526	3.40298e-05	0.0443015	641	GO:0010200;GO:0044212;GO:0043565;GO:0003700;GO:0005634;GO:0046872	-	PF13912	virNOG21583;virNOG17460	R	sp|Q9SLD4|ZAT11_ARATH Zinc finger protein ZAT11 OS=Arabidopsis thaliana GN=ZAT11 PE=2 SV=1	gi|976918409|gb|KVI03589.1| Zinc finger, C2H2 [Cynara cardunculus var. scolymus]
TRINITY_DN3093_c2_g1	20.2133	48.9393	2.42114	0.0431499	1	2542	-	-	-	-	-	-	-
TRINITY_DN3156_c0_g1	13411.6	30198.7	2.25169	0.000490956	0.301086	2934	-	-	PF12796	virNOG01784	R	sp|Q9XEE6|C3H29_ARATH Zinc finger CCCH domain-containing protein 29 OS=Arabidopsis thaliana GN=At2g40140 PE=1 SV=1	gi|976926076|gb|KVI09953.1| hypothetical protein Ccrd_011656 [Cynara cardunculus var. scolymus]
TRINITY_DN3196_c0_g1	90.7284	218.166	2.4046	0.00277896	0.945058	1879	-	-	-	virNOG19539	O	sp|Q9LSD8|MUB4_ARATH Membrane-anchored ubiquitin-fold protein 4 OS=Arabidopsis thaliana GN=MUB4 PE=1 SV=1	gi|595929292|ref|XP_007215162.1| hypothetical protein PRUPE_ppa013526mg [Prunus persica] &gt;gi|645250138|ref|XP_008231069.1| PREDICTED: membrane-anchored ubiquitin-fold protein 4 [Prunus mume] &gt;gi|462411312|gb|EMJ16361.1| hypothetical protein PRUPE_ppa013526mg [Prunus persica]
TRINITY_DN3249_c0_g1	99.1102	485.23	4.89586	8.70453e-09	7.6123e-05	1300	-	-	PF06219	virNOG04197	S	-	gi|976916363|gb|KVI01878.1| hypothetical protein Ccrd_019843 [Cynara cardunculus var. scolymus]
TRINITY_DN3255_c0_g1	1283.61	4754.02	3.70364	0.000372708	0.249161	1443	GO:0006508;GO:0004222;GO:0031012;GO:0008270;GO:0016021	-	PF00413;PF01471	virNOG08784	OW	sp|Q9ZUJ5|5MMP_ARATH Metalloendoproteinase 5-MMP OS=Arabidopsis thaliana GN=5MMP PE=1 SV=1	gi|976911124|gb|KVH97783.1| hypothetical protein Ccrd_000108 [Cynara cardunculus var. scolymus]
TRINITY_DN3257_c0_g1	109.047	563.787	5.17012	5.03699e-08	0.000221017	1251	GO:0005634;GO:0016020;GO:0006355;GO:0003700;GO:0003677	-	PF00847	virNOG17335;virNOG10158	K	sp|Q9FJ93|DRE1D_ARATH Dehydration-responsive element-binding protein 1D OS=Arabidopsis thaliana GN=DREB1D PE=2 SV=1	gi|720072883|ref|XP_010278524.1| PREDICTED: dehydration-responsive element-binding protein 1D-like [Nelumbo nucifera]
TRINITY_DN3262_c1_g1	2.69339	16.8942	6.27246	0.0254898	1	395	-	-	-	-	-	-	-
TRINITY_DN3279_c0_g1	41.7788	136.13	3.25836	0.000369096	0.248989	4242	-	-	-	-	-	-	-
TRINITY_DN3343_c0_g1	29.9902	68.5524	2.28582	0.0318473	1	1027	-	-	-	virNOG05595;KOG0192	T	-	gi|976909434|gb|KVH96546.1| ACT domain-containing protein [Cynara cardunculus var. scolymus]
TRINITY_DN3351_c4_g2	58.5253	208.034	3.55461	0.00726106	1	1777	GO:0006741;GO:0019674;GO:0016310;GO:0003951	K00858	PF01513	virNOG02448	G	sp|Q5JK52|NADK1_ORYSJ Probable NAD kinase 1 OS=Oryza sativa subsp. japonica GN=Os01g0957000 PE=2 SV=1	gi|332371920|dbj|BAK22410.1| NAD kinase [Nicotiana benthamiana]
TRINITY_DN3360_c0_g3	525.646	1492	2.83841	1.93395e-05	0.028139	2249	-	-	PF07939	virNOG19255	S	-	gi|225446678|ref|XP_002277345.1| PREDICTED: uncharacterized protein LOC100260838 [Vitis vinifera]
TRINITY_DN3411_c0_g1	590.548	1338.11	2.26587	0.000680502	0.37405	2983	-	-	-	virNOG11017	K	sp|Q9LDD4|ARID2_ARATH AT-rich interactive domain-containing protein 2 OS=Arabidopsis thaliana GN=ARID2 PE=1 SV=1	gi|976912805|gb|KVH99272.1| Homeodomain-like protein, partial [Cynara cardunculus var. scolymus]
TRINITY_DN3469_c0_g4	93.315	220.218	2.35995	0.0257094	1	1471	GO:0016747	K13065	PF02458	virNOG03060	R	sp|Q8GSM7|HST_TOBAC Shikimate O-hydroxycinnamoyltransferase OS=Nicotiana tabacum GN=HST PE=1 SV=1	gi|976912564|gb|KVH99042.1| Chloramphenicol acetyltransferase-like domain-containing protein [Cynara cardunculus var. scolymus]
TRINITY_DN3496_c1_g1	586.135	1963.71	3.35028	0.000269477	0.204046	3381	GO:0006950	-	PF00582	virNOG09527	S	sp|Q8VYN9|PHO32_ARATH Universal stress protein PHOS32 OS=Arabidopsis thaliana GN=PHOS32 PE=1 SV=1	gi|976926513|gb|KVI10374.1| Rossmann-like alpha/beta/alpha sandwich fold [Cynara cardunculus var. scolymus]
TRINITY_DN3500_c0_g2	10.8926	46.906	4.30621	0.0153482	1	593	-	-	-	-	-	-	-
TRINITY_DN3516_c2_g1	302.143	957.332	3.16847	9.07667e-05	0.0910182	3161	-	-	PF11904	virNOG02097	R	sp|Q5F259|AN13B_MOUSE Ankyrin repeat domain-containing protein 13B OS=Mus musculus GN=Ankrd13b PE=2 SV=1	gi|976903077|gb|KVH91002.1| Ankyrin repeat-containing protein [Cynara cardunculus var. scolymus]
TRINITY_DN3570_c2_g1	1244.04	3841.72	3.08809	2.04582e-06	0.00421694	1971	GO:0016021	-	PF05633	virNOG02232	S	-	gi|976911993|gb|KVH98616.1| hypothetical protein Ccrd_023165 [Cynara cardunculus var. scolymus]
TRINITY_DN3589_c0_g1	130.152	265.096	2.03682	0.0224023	1	1971	GO:0016787	-	PF00293	virNOG14018	L	sp|Q8L7W2|NUDT8_ARATH Nudix hydrolase 8 OS=Arabidopsis thaliana GN=NUDT8 PE=2 SV=2	gi|460400562|ref|XP_004245803.1| PREDICTED: nudix hydrolase 8 [Solanum lycopersicum]
TRINITY_DN3590_c0_g4	663.452	2818.65	4.24845	3.69455e-09	4.56924e-05	956	-	K09422	PF00249	virNOG09221;COG5147	K	sp|Q9FDW1|MYB44_ARATH Transcription factor MYB44 OS=Arabidopsis thaliana GN=MYB44 PE=1 SV=1	gi|976904834|gb|KVH92490.1| hypothetical protein Ccrd_005471 [Cynara cardunculus var. scolymus]
TRINITY_DN3590_c0_g2	129.253	477.979	3.69802	0.000107093	0.101882	1121	-	K09422	PF00249	virNOG09221	K	sp|Q9FDW1|MYB44_ARATH Transcription factor MYB44 OS=Arabidopsis thaliana GN=MYB44 PE=1 SV=1	gi|976904834|gb|KVH92490.1| hypothetical protein Ccrd_005471 [Cynara cardunculus var. scolymus]
TRINITY_DN3672_c0_g1	44.2325	103.978	2.35071	0.0127779	1	1897	-	-	-	virNOG03966	S	-	gi|1021053287|gb|KZN11065.1| hypothetical protein DCAR_003721 [Daucus carota subsp. sativus]
TRINITY_DN3751_c0_g2	184.523	436.555	2.36585	0.00116754	0.555366	1272	GO:0005525;GO:0007264;GO:0005622	K07904	-	virNOG00384	U	sp|Q9FJH0|RAA1F_ARATH Ras-related protein RABA1f OS=Arabidopsis thaliana GN=RABA1F PE=2 SV=1	gi|976916682|gb|KVI02183.1| Ran GTPase [Cynara cardunculus var. scolymus]
TRINITY_DN3771_c0_g1	9.45872	104.043	10.9997	0.0135386	1	1236	-	-	-	virNOG25009;virNOG19628;virNOG08820	R	-	gi|976909833|gb|KVH96823.1| hypothetical protein Ccrd_001085 [Cynara cardunculus var. scolymus]
TRINITY_DN3777_c0_g2	405.409	2115.66	5.21857	0.0290888	1	1814	-	-	PF13359	virNOG01944	L	sp|Q94K49|ALP1_ARATH Protein ANTAGONIST OF LIKE HETEROCHROMATIN PROTEIN 1 OS=Arabidopsis thaliana GN=ALP1 PE=1 SV=1	gi|976915180|gb|KVI01147.1| Harbinger transposase-derived nuclease [Cynara cardunculus var. scolymus]
TRINITY_DN3777_c0_g1	2986.39	11458.1	3.83678	1.91378e-08	0.000129102	1784	-	-	PF13359	virNOG01944	L	sp|Q94K49|ALP1_ARATH Protein ANTAGONIST OF LIKE HETEROCHROMATIN PROTEIN 1 OS=Arabidopsis thaliana GN=ALP1 PE=1 SV=1	gi|976906574|gb|KVH93992.1| Harbinger transposase-derived nuclease [Cynara cardunculus var. scolymus]
TRINITY_DN3787_c0_g1	410.422	1424.33	3.4704	0.0446788	1	2299	-	K07025	-	virNOG13661	R	sp|Q09893|YAI5_SCHPO Uncharacterized protein C24B11.05 OS=Schizosaccharomyces pombe (strain 972 / ATCC 24843) GN=SPAC24B11.05 PE=3 SV=1	gi|1021029683|gb|KZM87468.1| hypothetical protein DCAR_024602 [Daucus carota subsp. sativus]
TRINITY_DN3873_c1_g1	34.4629	243.227	7.05765	0.00111488	0.544275	2647	GO:0005634;GO:0003677;GO:0006355	-	-	virNOG04583;virNOG00684	SK	sp|Q8GUH2|Y1015_ARATH Uncharacterized protein At1g01500 OS=Arabidopsis thaliana GN=At1g01500 PE=2 SV=1	gi|976910582|gb|KVH97268.1| Homeodomain-like protein [Cynara cardunculus var. scolymus]
TRINITY_DN3892_c1_g2	19.0533	87.2963	4.58169	0.0245672	1	1207	-	-	-	-	-	-	-
TRINITY_DN3903_c0_g1	208.113	713.633	3.42907	0.0455417	1	1198	-	-	PF04674	virNOG00164	R	sp|Q9FE06|EXOL2_ARATH Protein EXORDIUM-like 2 OS=Arabidopsis thaliana GN=EXL2 PE=2 SV=1	gi|976911909|gb|KVH98540.1| Phosphate-induced protein 1 [Cynara cardunculus var. scolymus]
TRINITY_DN3905_c0_g2	12.626	65.1485	5.15988	0.000192115	0.160178	358	-	-	-	-	-	-	-
TRINITY_DN3925_c2_g1	196.694	799.576	4.06507	0.0484923	1	1786	-	-	PF06219	virNOG04197	S	-	gi|976927026|gb|KVI10855.1| Protein of unknown function DUF1005 [Cynara cardunculus var. scolymus]
TRINITY_DN3929_c0_g1	2.37852	18.4497	7.7568	0.0121694	1	747	-	-	PF00847	virNOG21959;virNOG23824	K	sp|Q9SFE4|ERF12_ARATH Ethylene-responsive transcription factor ERF012 OS=Arabidopsis thaliana GN=ERF012 PE=2 SV=1	gi|976900554|gb|KVH88737.1| hypothetical protein Ccrd_025856 [Cynara cardunculus var. scolymus]
TRINITY_DN3944_c1_g1	3.76916	32.678	8.66984	0.00208304	0.796761	693	-	-	-	-	-	-	-
TRINITY_DN3956_c1_g1	21.7383	157.132	7.22834	0.000621696	0.35216	1811	-	-	-	-	-	-	-
TRINITY_DN4027_c0_g1	13.5196	46.7124	3.45516	0.0380757	1	1776	-	K14487	PF03321	virNOG03990	R	sp|O82333|GH31_ARATH Probable indole-3-acetic acid-amido synthetase GH3.1 OS=Arabidopsis thaliana GN=GH3.1 PE=2 SV=1	gi|976905700|gb|KVH93320.1| GH3 auxin-responsive promoter [Cynara cardunculus var. scolymus]
TRINITY_DN4054_c2_g1	3.70777	35.2969	9.51972	0.000310992	0.223935	1092	-	-	-	-	-	-	-
TRINITY_DN4063_c1_g1	16.9655	48.3254	2.84845	0.020679	1	1462	-	-	PF13833	virNOG20239	T	-	gi|976910387|gb|KVH97088.1| Calcium-binding EF-hand [Cynara cardunculus var. scolymus]
TRINITY_DN4089_c2_g2	301.225	1022.34	3.39395	1.17466e-06	0.00272393	1483	GO:0016757;GO:0016021	K08238	PF05637	virNOG03554	MG	sp|Q9CA75|XXT5_ARATH Probable xyloglucan 6-xylosyltransferase 5 OS=Arabidopsis thaliana GN=XXT5 PE=1 SV=1	gi|976921764|gb|KVI06435.1| Galactosyl transferase [Cynara cardunculus var. scolymus]
TRINITY_DN4089_c2_g3	102.574	252.045	2.4572	0.00158295	0.675072	1170	GO:0016021;GO:0016757	K08238	PF05637	virNOG03554	GM	sp|Q9LF80|XXT3_ARATH Probable xyloglucan 6-xylosyltransferase 3 OS=Arabidopsis thaliana GN=XXT3 PE=2 SV=1	gi|976921764|gb|KVI06435.1| Galactosyl transferase [Cynara cardunculus var. scolymus]
TRINITY_DN4089_c2_g1	2.7266	15.0849	5.53251	0.0442762	1	320	GO:0016021;GO:0016757	K08238	PF05637	virNOG03554	MG	sp|O22775|XXT2_ARATH Xyloglucan 6-xylosyltransferase 2 OS=Arabidopsis thaliana GN=XXT2 PE=1 SV=1	gi|593800119|ref|XP_007163097.1| hypothetical protein PHAVU_001G206000g [Phaseolus vulgaris] &gt;gi|593800121|ref|XP_007163098.1| hypothetical protein PHAVU_001G206000g [Phaseolus vulgaris] &gt;gi|561036561|gb|ESW35091.1| hypothetical protein PHAVU_001G206000g [Phaseolus vulgaris] &gt;gi|561036562|gb|ESW35092.1| hypothetical protein PHAVU_001G206000g [Phaseolus vulgaris]
TRINITY_DN4117_c0_g2	0.673347	20.9755	31.1511	0.000319885	0.223935	827	-	-	-	-	-	-	-
TRINITY_DN4158_c0_g2	19.3863	78.138	4.03058	0.000660211	0.368353	656	-	-	-	-	-	-	-
TRINITY_DN4193_c0_g1	118.543	260.989	2.20163	0.00474966	1	1073	-	-	-	-	-	-	-
TRINITY_DN4199_c1_g1	46.1667	162.888	3.52825	8.83776e-05	0.0898364	1556	GO:0032259;GO:0008270;GO:0008168;GO:0005634	-	-	virNOG07957	BK	sp|Q9C5X4|ATX1_ARATH Histone-lysine N-methyltransferase ATX1 OS=Arabidopsis thaliana GN=ATX1 PE=1 SV=2	gi|976900112|gb|KVH88382.1| FY-rich, C-terminal [Cynara cardunculus var. scolymus]
TRINITY_DN4218_c0_g1	82.9034	1102.85	13.3028	0.0124494	1	3266	GO:0043167;GO:0000166;GO:0004672	K13412	PF00069	virNOG01312;COG5126	DZT	sp|Q6F3A6|CDPKA_ORYSJ Calcium-dependent protein kinase 10 OS=Oryza sativa subsp. japonica GN=CPK10 PE=2 SV=1	gi|976902622|gb|KVH90561.1| Calcium-binding EF-hand [Cynara cardunculus var. scolymus]
TRINITY_DN4243_c0_g1	44.6628	308.952	6.91743	0.00426369	1	2484	GO:0055114;GO:0016491	-	PF07992	virNOG13120	C	sp|B4F6I3|AIFM2_XENTR Apoptosis-inducing factor 2 OS=Xenopus tropicalis GN=aifm2 PE=2 SV=1	gi|1021037175|gb|KZM94958.1| hypothetical protein DCAR_018200 [Daucus carota subsp. sativus]
TRINITY_DN4301_c1_g1	2157.53	4404.51	2.04145	0.00226437	0.828982	2244	-	K09286	PF00847	virNOG05998	K	sp|Q8H1E4|RAP24_ARATH Ethylene-responsive transcription factor RAP2-4 OS=Arabidopsis thaliana GN=RAP2-4 PE=1 SV=1	gi|976913234|gb|KVH99529.1| AP2/ERF domain-containing protein [Cynara cardunculus var. scolymus]
TRINITY_DN4302_c0_g1	147.158	308.531	2.0966	0.00713849	1	1054	GO:0008270	-	PF13920	virNOG24104	O	-	gi|976906830|gb|KVH94230.1| Zinc finger, RING/FYVE/PHD-type [Cynara cardunculus var. scolymus]
TRINITY_DN4308_c0_g2	403.919	1274.47	3.15528	0.00292336	0.970108	1891	GO:0050468;GO:0016614;GO:0050660;GO:0016021;GO:0055114	-	PF01565;PF08031	virNOG00954	R	sp|Q9SA99|BBE2_ARATH Berberine bridge enzyme-like 2 OS=Arabidopsis thaliana GN=At1g11770 PE=2 SV=1	gi|976920698|gb|KVI05412.1| Berberine/berberine-like protein [Cynara cardunculus var. scolymus]
TRINITY_DN4419_c0_g1	319.132	5658.23	17.7301	1.22119e-07	0.000453094	2785	-	-	-	virNOG03800	S	-	gi|976913533|gb|KVH99786.1| EEIG1/EHBP1 N-terminal domain-containing protein [Cynara cardunculus var. scolymus]
TRINITY_DN4428_c1_g2	0	6.21631	Inf	0.0435139	1	816	GO:0008270	-	-	virNOG19532;virNOG24104	O	-	gi|731347513|ref|XP_010685024.1| PREDICTED: E3 ubiquitin-protein ligase RNF34-like [Beta vulgaris subsp. vulgaris] &gt;gi|870853767|gb|KMT05634.1| hypothetical protein BVRB_7g167720 [Beta vulgaris subsp. vulgaris]
TRINITY_DN4443_c0_g2	98.3865	418.884	4.25754	0.0499181	1	3339	GO:0016021;GO:0004674;GO:0006468;GO:0005524	-	PF12819;PF07714	virNOG10059	T	sp|Q9LX66|HERK_ARATH Receptor-like protein kinase HERK 1 OS=Arabidopsis thaliana GN=HERK1 PE=1 SV=1	gi|976918262|gb|KVI03453.1| hypothetical protein Ccrd_018238 [Cynara cardunculus var. scolymus]
TRINITY_DN4449_c0_g1	83.7343	353.571	4.22254	4.26206e-07	0.00119791	535	-	-	PF06219	virNOG04197;virNOG12336	S	-	gi|976916363|gb|KVI01878.1| hypothetical protein Ccrd_019843 [Cynara cardunculus var. scolymus]
TRINITY_DN4462_c0_g2	54.6425	186.687	3.41652	0.0349648	1	1671	-	-	-	virNOG04239	R	sp|Q9UT00|YKH3_SCHPO Uncharacterized protein PYUK71.03c OS=Schizosaccharomyces pombe (strain 972 / ATCC 24843) GN=SPAPYUK71.03c PE=1 SV=1	gi|976920523|gb|KVI05245.1| C2 calcium/lipid-binding domain, CaLB [Cynara cardunculus var. scolymus]
TRINITY_DN4496_c0_g1	18.4065	44.8999	2.43935	0.0469332	1	698	GO:0005634;GO:0016021;GO:0003677;GO:0006355	-	PF02365	virNOG07534	S	sp|Q949N0|NAC53_ARATH NAC domain-containing protein 53 OS=Arabidopsis thaliana GN=NAC053 PE=2 SV=1	gi|976925784|gb|KVI09674.1| No apical meristem (NAM) protein [Cynara cardunculus var. scolymus]
TRINITY_DN4499_c0_g1	117.253	320.146	2.73038	0.00558086	1	886	GO:0009055;GO:0045454;GO:0055114;GO:0005623;GO:0015035	-	PF00462	virNOG23020	O	sp|Q9SGP6|GRXC9_ARATH Glutaredoxin-C9 OS=Arabidopsis thaliana GN=GRXC9 PE=1 SV=1	gi|976919233|gb|KVI04312.1| Glutaredoxin [Cynara cardunculus var. scolymus]
TRINITY_DN4538_c0_g1	96.9112	345.852	3.56875	0.0283942	1	1666	GO:0009507;GO:0016021	-	-	virNOG36703	S	sp|Q1KXP9|YCF15_HELAN Putative uncharacterized protein ycf15 OS=Helianthus annuus GN=ycf15-A PE=5 SV=1	gi|134093250|ref|YP_001109551.1| hypothetical protein Poptr_cp073 [Populus trichocarpa] &gt;gi|134093267|ref|YP_001109568.1| hypothetical protein Poptr_cp090 [Populus trichocarpa] &gt;gi|133712112|gb|ABO36755.1| conserved hypothetical protein [Populus trichocarpa] &gt;gi|133712129|gb|ABO36772.1| conserved hypothetical protein [Populus trichocarpa]
TRINITY_DN4700_c0_g3	0.682069	9.11943	13.3702	0.0464393	1	2103	-	K12447	-	KOG0017;virNOG00819;virNOG19602	R	sp|Q94HW2|POLR1_ARATH Retrovirus-related Pol polyprotein from transposon RE1 OS=Arabidopsis thaliana GN=RE1 PE=2 SV=1	gi|1012330817|gb|KYP42321.1| Copia protein [Cajanus cajan]
TRINITY_DN4735_c0_g1	76.0281	356.714	4.69188	0.0013163	0.595584	801	-	-	-	virNOG24821;virNOG24348	S	-	gi|502156612|ref|XP_004510561.1| PREDICTED: uncharacterized protein LOC101513746 [Cicer arietinum]
TRINITY_DN4805_c0_g1	40.7866	91.7582	2.24972	0.0436087	1	777	-	-	-	-	-	-	-
TRINITY_DN4974_c0_g2	326.152	829.19	2.54235	0.00167815	0.700262	1365	GO:0016021;GO:0055114	-	PF03188;PF04526	virNOG02806	T	sp|Q9FKH6|B561P_ARATH Cytochrome b561 and DOMON domain-containing protein At5g35735 OS=Arabidopsis thaliana GN=At5g35735 PE=2 SV=1	gi|976916580|gb|KVI02085.1| cytochrome b561/ferric reductase transmembrane [Cynara cardunculus var. scolymus]
TRINITY_DN5032_c0_g1	82.7338	258.118	3.11986	0.0289311	1	1918	GO:0046872;GO:0016020	K10666	PF13920	virNOG17362;virNOG14427	O	sp|Q09463|RNF5_CAEEL RING finger protein 5 OS=Caenorhabditis elegans GN=rnf-5 PE=1 SV=1	gi|976911734|gb|KVH98374.1| Zinc finger, RING/FYVE/PHD-type [Cynara cardunculus var. scolymus]
TRINITY_DN5035_c0_g3	290.38	630.847	2.17249	0.00872949	1	2091	GO:0046872	K11982	PF14369;PF13639;PF06547	virNOG10608;virNOG00007	O	sp|Q940T5|RDUF2_ARATH E3 ubiquitin-protein ligase RDUF2 OS=Arabidopsis thaliana GN=DURF2 PE=1 SV=1	gi|976929092|gb|KVI11957.1| protein of unknown function DUF1117 [Cynara cardunculus var. scolymus]
TRINITY_DN5052_c0_g1	3633.65	9226.34	2.53914	0.000557237	0.329317	3362	-	-	-	virNOG09836	K	sp|Q7F2L3|NAC48_ORYSJ NAC domain-containing protein 48 OS=Oryza sativa subsp. japonica GN=NAC48 PE=2 SV=1	gi|976905082|gb|KVH92730.1| No apical meristem (NAM) protein [Cynara cardunculus var. scolymus]
TRINITY_DN5060_c0_g1	49.6417	179.533	3.61657	4.57111e-05	0.0555256	3659	GO:0030246;GO:0016021;GO:0005524;GO:0004674;GO:0006468	-	PF08263;PF00560;PF00069;PF13855	virNOG06693;COG0515	T	sp|Q9S7I6|RPK2_ARATH LRR receptor-like serine/threonine-protein kinase RPK2 OS=Arabidopsis thaliana GN=RPK2 PE=2 SV=1	gi|976909005|gb|KVH96193.1| Concanavalin A-like lectin/glucanase, subgroup [Cynara cardunculus var. scolymus]
TRINITY_DN5068_c2_g1	0	6.26363	Inf	0.0428486	1	1149	-	-	-	-	-	-	-
TRINITY_DN5146_c0_g1	105.282	368.799	3.50297	0.0460659	1	822	-	-	-	-	-	-	-
TRINITY_DN5159_c0_g1	227.234	949.759	4.17966	0.00542347	1	1564	GO:0016020	K13448	PF13405;PF13833	virNOG21480;KOG0027	T	sp|Q9SRE6|CML38_ARATH Calcium-binding protein CML38 OS=Arabidopsis thaliana GN=CML38 PE=2 SV=1	gi|976921080|gb|KVI05783.1| Calcium-binding EF-hand [Cynara cardunculus var. scolymus]
TRINITY_DN5260_c0_g3	11.1095	70.5118	6.34696	3.16731e-05	0.0419952	779	-	-	-	-	-	-	-
TRINITY_DN5282_c0_g1	667.075	1550.26	2.32396	0.0246085	1	2445	GO:1904823;GO:0016021;GO:0005345	K06901	PF00860	virNOG02075	S	sp|Q9SRK7|AZG1_ARATH Adenine/guanine permease AZG1 OS=Arabidopsis thaliana GN=AZG1 PE=2 SV=1	gi|976926144|gb|KVI10017.1| Xanthine/uracil/vitamin C permease [Cynara cardunculus var. scolymus]
TRINITY_DN5331_c0_g1	45.934	520.551	11.3326	0.018316	1	2406	GO:0016021;GO:0005802;GO:0010289;GO:0005768;GO:0005739;GO:0047262;GO:0000139	K13648	-	virNOG06657	G	sp|Q9LSG3|GAUT8_ARATH Galacturonosyltransferase 8 OS=Arabidopsis thaliana GN=GAUT8 PE=1 SV=1	gi|976906819|gb|KVH94219.1| Glycosyl transferase, family 8 [Cynara cardunculus var. scolymus]
TRINITY_DN5386_c0_g1	128.963	511.511	3.96634	3.33406e-07	0.00103085	1315	-	-	-	-	-	-	-
TRINITY_DN5530_c0_g2	0	7.21041	Inf	0.0257194	1	552	GO:0016021;GO:0005783	-	-	virNOG23548	S	sp|Q3T073|SERP2_BOVIN Stress-associated endoplasmic reticulum protein 2 OS=Bos taurus GN=SERP2 PE=3 SV=1	gi|976912525|gb|KVH99005.1| hypothetical protein Ccrd_022774, partial [Cynara cardunculus var. scolymus]
TRINITY_DN5535_c0_g2	2.35772	17.4379	7.3961	0.0157396	1	1389	GO:0005488	-	PF00069	virNOG02819	T	sp|Q9LTC0|PBL19_ARATH Probable serine/threonine-protein kinase PBL19 OS=Arabidopsis thaliana GN=PBL19 PE=1 SV=1	gi|976910501|gb|KVH97191.1| Concanavalin A-like lectin/glucanase, subgroup [Cynara cardunculus var. scolymus]
TRINITY_DN5567_c0_g1	2.00964	57.807	28.7649	0.0245758	1	1137	-	-	-	virNOG25714;NOG164918	S	-	gi|976901332|gb|KVH89392.1| CO/COL/TOC1, conserved site-containing protein [Cynara cardunculus var. scolymus]
TRINITY_DN5611_c1_g1	1447.28	3200.23	2.2112	0.00208283	0.796761	2062	-	-	PF04674	virNOG00164	R	sp|Q9FE06|EXOL2_ARATH Protein EXORDIUM-like 2 OS=Arabidopsis thaliana GN=EXL2 PE=2 SV=1	gi|976927096|gb|KVI10916.1| Phosphate-induced protein 1 [Cynara cardunculus var. scolymus]
TRINITY_DN5636_c0_g1	330.851	747.643	2.25976	0.0267238	1	1904	GO:0005634;GO:0043565;GO:0006355;GO:0003700	K09419	-	virNOG17082	K	sp|P22335|HSF24_SOLPE Heat shock factor protein HSF24 OS=Solanum peruvianum GN=HSF24 PE=2 SV=1	gi|976904876|gb|KVH92530.1| Heat shock factor (HSF)-type, DNA-binding [Cynara cardunculus var. scolymus]
TRINITY_DN5638_c0_g3	324.49	700.216	2.1579	0.0025182	0.881428	2732	-	-	PF13359	virNOG01944	L	sp|Q94K49|ALP1_ARATH Protein ANTAGONIST OF LIKE HETEROCHROMATIN PROTEIN 1 OS=Arabidopsis thaliana GN=ALP1 PE=1 SV=1	gi|976915634|gb|KVI01529.1| Harbinger transposase-derived nuclease [Cynara cardunculus var. scolymus]
TRINITY_DN5742_c0_g1	31.4315	195.197	6.21024	2.65097e-08	0.000140511	2238	-	-	-	virNOG01277	S	-	gi|661890085|emb|CDP06307.1| unnamed protein product [Coffea canephora]
TRINITY_DN5769_c0_g1	59.0815	121.515	2.05674	0.0270916	1	1431	GO:0005488;GO:0006811	K01537	PF00690;PF00122	NOG00070;virNOG01632;virNOG30977	P	sp|O81108|ACA2_ARATH Calcium-transporting ATPase 2, plasma membrane-type OS=Arabidopsis thaliana GN=ACA2 PE=1 SV=1	gi|976904817|gb|KVH92474.1| Calcium-transporting P-type ATPase, N-terminal autoinhibitory domain-containing protein [Cynara cardunculus var. scolymus]
TRINITY_DN5883_c0_g1	0	8.35967	Inf	0.0135721	1	974	-	-	-	-	-	-	-
TRINITY_DN5931_c0_g1	39.1888	82.2467	2.09873	0.0468003	1	857	-	-	-	-	-	-	-
TRINITY_DN6110_c0_g1	65.251	184.443	2.82667	0.0371926	1	1055	-	-	-	virNOG05888	S	-	gi|697149495|ref|XP_009628959.1| PREDICTED: extensin-like [Nicotiana tomentosiformis] &gt;gi|1025051444|ref|XP_016447707.1| PREDICTED: extensin-like [Nicotiana tabacum]
TRINITY_DN6121_c0_g1	102.761	385.499	3.75142	0.00611752	1	1999	GO:0004722;GO:0046872;GO:0006470	K17506	-	virNOG01720;COG0631	T	sp|Q9XEE8|P2C30_ARATH Probable protein phosphatase 2C 30 OS=Arabidopsis thaliana GN=PP2C5 PE=2 SV=1	gi|976906707|gb|KVH94117.1| hypothetical protein Ccrd_003853 [Cynara cardunculus var. scolymus]
TRINITY_DN6139_c0_g1	666.977	1728.42	2.59142	0.0210032	1	1452	GO:0005524;GO:0004674;GO:0006468	-	PF00069	virNOG11632	T	sp|O80888|M3K17_ARATH Mitogen-activated protein kinase kinase kinase 17 OS=Arabidopsis thaliana GN=MAPKKK17 PE=1 SV=1	gi|976904867|gb|KVH92521.1| Protein kinase, ATP binding site-containing protein [Cynara cardunculus var. scolymus]
TRINITY_DN6161_c0_g1	67.0295	186.241	2.77849	0.000810121	0.423346	1778	-	-	-	-	-	-	-
TRINITY_DN6216_c2_g1	6.79486	82.6434	12.1626	5.76835e-08	0.0002378	1734	-	-	PF00931	NOG65877;virNOG13489;NOG96741	STR	sp|Q40392|TMVRN_NICGU TMV resistance protein N OS=Nicotiana glutinosa GN=N PE=1 SV=1	gi|720023681|ref|XP_010263405.1| PREDICTED: uncharacterized protein LOC104601664 [Nelumbo nucifera]
TRINITY_DN6227_c0_g1	149.276	608.443	4.07595	9.20748e-06	0.0151831	1017	-	-	-	virNOG26867	S	-	gi|976915304|gb|KVI01267.1| hypothetical protein Ccrd_020453 [Cynara cardunculus var. scolymus]
TRINITY_DN6362_c1_g2	93.1133	197.215	2.11801	0.011155	1	2292	-	-	-	-	-	-	-
TRINITY_DN6367_c2_g1	0	6.0879	Inf	0.0485851	1	310	-	-	-	-	-	-	-
TRINITY_DN6445_c0_g1	3.05019	18.8946	6.19456	0.0330703	1	629	GO:0006102;GO:0006099;GO:0051287;GO:0004450;GO:0000287	K00031	-	virNOG10835	C	sp|P50218|IDHC_TOBAC Isocitrate dehydrogenase [NADP] OS=Nicotiana tabacum PE=2 SV=1	gi|82941453|dbj|BAE48792.1| NADP-isocitrate dehydrogenase [Codonopsis lanceolata]
TRINITY_DN6547_c2_g1	8.13283	29.3774	3.61219	0.0268815	1	1863	GO:0016021	-	-	virNOG25339;virNOG23309;virNOG25530	S	-	gi|1021486768|ref|XP_016186418.1| PREDICTED: uncharacterized protein LOC107628127 [Arachis ipaensis]
TRINITY_DN6652_c0_g1	71.7969	167.209	2.32891	0.00581258	1	2297	GO:0004715;GO:0016021;GO:0030247;GO:0018108;GO:0005524	-	PF14380;PF13947	virNOG04329	T	sp|Q9C6K9|LRL11_ARATH LEAF RUST 10 DISEASE-RESISTANCE LOCUS RECEPTOR-LIKE PROTEIN KINASE-like 1.1 OS=Arabidopsis thaliana GN=LRK10L-1.1 PE=2 SV=1	gi|223533652|gb|EEF35389.1| wall-associated kinase, putative [Ricinus communis]
TRINITY_DN6660_c0_g1	8.8991	57.6367	6.47668	0.0218752	1	749	GO:0006355;GO:0003677;GO:0003700;GO:0005634	-	PF00847	virNOG23633;virNOG22802	K	sp|Q9FJ90|ERF25_ARATH Ethylene-responsive transcription factor ERF025 OS=Arabidopsis thaliana GN=ERF025 PE=2 SV=1	gi|976926254|gb|KVI10123.1| AP2/ERF domain-containing protein [Cynara cardunculus var. scolymus]
TRINITY_DN6682_c0_g1	12.2081	137.806	11.2881	0.0487738	1	2163	-	-	-	virNOG12850;virNOG10564	O	sp|Q8GT75|NIP1_ARATH NEP1-interacting protein 1 OS=Arabidopsis thaliana GN=NIP1 PE=1 SV=2	gi|976920456|gb|KVI05183.1| Zinc finger, RING/FYVE/PHD-type [Cynara cardunculus var. scolymus]
TRINITY_DN6753_c0_g4	116.779	386.443	3.30919	0.0432462	1	893	GO:0009507;GO:0016021;GO:0015979;GO:0009522	K02690	-	virNOG11124;virNOG39607;virNOG00930	RC	sp|Q3V535|PSAB_ACOCL Photosystem I P700 chlorophyll a apoprotein A2 OS=Acorus calamus GN=psaB PE=3 SV=1	gi|976906485|gb|KVH93911.1| Arabinogalactan peptide, AGP [Cynara cardunculus var. scolymus]
TRINITY_DN6816_c0_g1	353.629	731.852	2.06955	0.0156727	1	2099	GO:0006470;GO:0046872;GO:0004722	K14803	PF00481	COG0631;virNOG11570	T	sp|Q9LNF4|P2C13_ARATH Probable protein phosphatase 2C 13 OS=Arabidopsis thaliana GN=At1g48040 PE=2 SV=2	gi|976901631|gb|KVH89654.1| hypothetical protein Ccrd_008357 [Cynara cardunculus var. scolymus]
TRINITY_DN6842_c1_g1	18.7002	97.3601	5.20637	0.0439784	1	2134	-	-	-	-	-	-	-
TRINITY_DN6890_c0_g1	42.8529	115.435	2.69375	0.0430846	1	1471	-	-	-	virNOG20147;virNOG25080;euNOG31157	S	-	gi|225439354|ref|XP_002270752.1| PREDICTED: uncharacterized protein LOC100259819 [Vitis vinifera]
TRINITY_DN6895_c0_g1	347.225	1561.54	4.4972	0.0256146	1	2242	GO:0006355	-	PF03514	virNOG00614	K	sp|Q9LDL7|PAT1_ARATH Scarecrow-like transcription factor PAT1 OS=Arabidopsis thaliana GN=PAT1 PE=2 SV=1	gi|976912617|gb|KVH99094.1| Transcription factor GRAS, partial [Cynara cardunculus var. scolymus]
TRINITY_DN6945_c0_g2	155.66	409.586	2.63129	0.000336874	0.233624	1987	GO:0016310;GO:0000166;GO:0004672	-	PF00069	virNOG32194	T	sp|O80888|M3K17_ARATH Mitogen-activated protein kinase kinase kinase 17 OS=Arabidopsis thaliana GN=MAPKKK17 PE=1 SV=1	gi|976921399|gb|KVI06091.1| Protein kinase, ATP binding site-containing protein [Cynara cardunculus var. scolymus]
TRINITY_DN6985_c0_g1	3652.14	8363.34	2.28998	0.000614409	0.35216	3394	GO:0016787;GO:0006629;GO:0016020	-	PF01764	virNOG13882	S	-	gi|976929611|gb|KVI12453.1| Lipase, class 3 [Cynara cardunculus var. scolymus]
TRINITY_DN7070_c0_g1	6.41189	93.9524	14.6528	5.23413e-05	0.0606873	3222	GO:0005992;GO:0016787;GO:0016757	K16055	PF02358;PF00982	virNOG00839	G	sp|Q9LMI0|TPS7_ARATH Probable alpha,alpha-trehalose-phosphate synthase [UDP-forming] 7 OS=Arabidopsis thaliana GN=TPS7 PE=1 SV=1	gi|976909756|gb|KVH96785.1| Glycosyl transferase, family 20 [Cynara cardunculus var. scolymus]
TRINITY_DN7100_c0_g1	155.131	321.184	2.07041	0.0196383	1	1052	-	-	PF00564	virNOG14007	S	-	gi|976904713|gb|KVH92373.1| hypothetical protein Ccrd_005560 [Cynara cardunculus var. scolymus]
TRINITY_DN7155_c0_g2	5.41126	21.6162	3.99466	0.0447029	1	1062	-	-	-	-	-	-	-
TRINITY_DN7189_c0_g1	52.9018	1015.38	19.1936	0.00658095	1	2090	-	K18211	-	virNOG00686	U	sp|Q9S7P9|SNP33_ARATH SNAP25 homologous protein SNAP33 OS=Arabidopsis thaliana GN=SNAP33 PE=1 SV=1	gi|1025407195|ref|XP_016438590.1| PREDICTED: SNAP25 homologous protein SNAP33 [Nicotiana tabacum]
TRINITY_DN7368_c0_g1	157.693	338.96	2.14949	0.00438606	1	3290	-	K09875	-	virNOG07065	G	sp|Q9M1K3|SIP21_ARATH Probable aquaporin SIP2-1 OS=Arabidopsis thaliana GN=SIP2-1 PE=2 SV=1	gi|802646621|ref|XP_012079611.1| PREDICTED: probable aquaporin SIP2-1 [Jatropha curcas] &gt;gi|643721789|gb|KDP31728.1| hypothetical protein JCGZ_14885 [Jatropha curcas]
TRINITY_DN7399_c0_g1	182.255	510.949	2.80349	0.0102204	1	2780	GO:0016757;GO:0016021	-	PF10250	virNOG08219	S	sp|O64884|OFT20_ARATH O-fucosyltransferase 20 OS=Arabidopsis thaliana GN=OFUT20 PE=1 SV=1	gi|976914428|gb|KVI00633.1| GDP-fucose protein O-fucosyltransferase [Cynara cardunculus var. scolymus]
TRINITY_DN7480_c0_g1	314.784	2279.87	7.24266	0.0203541	1	1982	GO:0005509	K13448	-	virNOG17909;virNOG20786	T	sp|Q9M7R0|ALL8_OLEEU Calcium-binding allergen Ole e 8 OS=Olea europaea PE=1 SV=1	gi|976909053|gb|KVH96237.1| Calcium-binding EF-hand [Cynara cardunculus var. scolymus]
TRINITY_DN7594_c0_g2	21.6387	71.2435	3.29241	0.0030174	0.986372	902	-	-	-	-	-	-	gi|970055353|ref|XP_015089320.1| PREDICTED: calmodulin-binding receptor-like cytoplasmic kinase 2 [Solanum pennellii]
TRINITY_DN7612_c1_g1	33.861	81.1698	2.39714	0.0166698	1	2046	GO:0009987	-	PF14214	KOG0987;NOG11552;virNOG02250	SD	-	gi|731362209|ref|XP_010692770.1| PREDICTED: uncharacterized protein LOC104905831 [Beta vulgaris subsp. vulgaris]
TRINITY_DN7620_c1_g1	2.03749	13.4637	6.60802	0.0421873	1	704	-	-	-	-	-	-	-
TRINITY_DN7705_c2_g2	37.5982	97.2293	2.58601	0.0148281	1	1049	-	K14649	PF07524	virNOG08064;virNOG24148	K	sp|Q9SYZ9|TAF8_ARATH Transcription initiation factor TFIID subunit 8 OS=Arabidopsis thaliana GN=TAF8 PE=1 SV=1	gi|1021040248|gb|KZM98029.1| hypothetical protein DCAR_014609 [Daucus carota subsp. sativus]
TRINITY_DN8028_c0_g1	19.5118	51.7966	2.65463	0.0275151	1	1395	-	-	-	-	-	-	-
TRINITY_DN8083_c0_g1	230.117	732.895	3.18487	0.0101236	1	2550	-	-	PF03514	virNOG08485	S	sp|Q9FYR7|SCL8_ARATH Scarecrow-like protein 8 OS=Arabidopsis thaliana GN=SCL8 PE=2 SV=1	gi|976926340|gb|KVI10208.1| Transcription factor GRAS [Cynara cardunculus var. scolymus]
TRINITY_DN8128_c0_g1	490.603	1400.27	2.85419	1.82668e-05	0.0276177	1539	GO:0033843;GO:0016021	K08238	PF05637	virNOG03554	MG	sp|Q9LF80|XXT3_ARATH Probable xyloglucan 6-xylosyltransferase 3 OS=Arabidopsis thaliana GN=XXT3 PE=2 SV=1	gi|976921764|gb|KVI06435.1| Galactosyl transferase [Cynara cardunculus var. scolymus]
TRINITY_DN8274_c0_g1	137.034	556.748	4.06284	0.00218319	0.81409	4001	GO:0016020	-	PF08263;PF00560;PF13855	virNOG30683;virNOG05170	R	sp|Q9LJS0|RLP42_ARATH Receptor like protein 42 OS=Arabidopsis thaliana GN=RLP42 PE=1 SV=1	gi|976907466|gb|KVH94823.1| Leucine-rich repeat-containing protein [Cynara cardunculus var. scolymus]
TRINITY_DN8395_c0_g1	0.664624	12.9046	19.4163	0.00953223	1	744	-	-	-	-	-	-	-
TRINITY_DN8422_c0_g1	28.2009	78.5821	2.78652	0.00770236	1	2057	-	-	PF07714	virNOG02548;NOG11846	T	sp|O04086|Y1105_ARATH Probable receptor-like protein kinase At1g11050 OS=Arabidopsis thaliana GN=At1g11050 PE=2 SV=1	gi|697136861|ref|XP_009622517.1| PREDICTED: probable receptor-like protein kinase At1g11050 [Nicotiana tomentosiformis]
TRINITY_DN8428_c0_g1	78.3037	254.205	3.24639	5.45978e-05	0.0623297	2994	-	-	-	virNOG01601	K	sp|Q5NB82|NLP3_ORYSJ Protein NLP3 OS=Oryza sativa subsp. japonica GN=NLP3 PE=3 SV=1	gi|590679466|ref|XP_007040589.1| Transcription factor, putative [Theobroma cacao] &gt;gi|508777834|gb|EOY25090.1| Transcription factor, putative [Theobroma cacao]
TRINITY_DN8455_c0_g1	16.9635	71.7733	4.23104	0.00161521	0.684896	1375	-	-	-	virNOG12702	T	-	gi|976923370|gb|KVI07705.1| Concanavalin A-like lectin/glucanase, subgroup [Cynara cardunculus var. scolymus]
TRINITY_DN8648_c0_g1	3.76379	55.9768	14.8725	8.49646e-05	0.0879271	2025	GO:0016787	-	-	-	-	-	gi|357507041|ref|XP_003623809.1| subtilisin-like serine protease [Medicago truncatula] &gt;gi|355498824|gb|AES80027.1| subtilisin-like serine protease [Medicago truncatula]
TRINITY_DN8667_c0_g1	19.1449	167.137	8.73013	1.00005e-09	1.48417e-05	3332	-	-	-	-	-	-	-
TRINITY_DN8681_c1_g3	336.534	1665.73	4.94966	1.67438e-10	4.14157e-06	1341	GO:0003676;GO:0016740;GO:0005634	K12581	PF04857	virNOG39068;virNOG39061	K	sp|Q9FMS6|CAF1K_ARATH Probable CCR4-associated factor 1 homolog 11 OS=Arabidopsis thaliana GN=CAF1-11 PE=2 SV=1	gi|976920932|gb|KVI05638.1| Ribonuclease CAF1 [Cynara cardunculus var. scolymus]
TRINITY_DN8701_c0_g1	775.609	2978.57	3.8403	0.00775488	1	1186	GO:0005576;GO:0019953	-	-	virNOG11171	R	sp|Q9LZT4|EXLA1_ARATH Expansin-like A1 OS=Arabidopsis thaliana GN=EXLA1 PE=2 SV=1	gi|976918874|gb|KVI04029.1| Barwin-like endoglucanase [Cynara cardunculus var. scolymus]
TRINITY_DN8736_c1_g1	12.9861	39.1204	3.01247	0.0336795	1	704	-	-	-	virNOG15922	P	-	gi|1035899135|gb|OAY28736.1| hypothetical protein MANES_15G090800 [Manihot esculenta]
TRINITY_DN8761_c1_g1	449.035	1091.9	2.43166	0.00127905	0.585877	3632	-	K14832	PF03914	virNOG02011;strNOG02038	KJ	sp|Q03701|CEBPZ_HUMAN CCAAT/enhancer-binding protein zeta OS=Homo sapiens GN=CEBPZ PE=1 SV=3	gi|1035910801|gb|OAY40395.1| hypothetical protein MANES_09G018800 [Manihot esculenta]
TRINITY_DN8789_c0_g1	66.1832	138.533	2.09317	0.0271551	1	1341	-	-	-	virNOG03258	T	sp|Q9LVJ3|RSH2C_ARATH Probable GTP diphosphokinase RSH2, chloroplastic OS=Arabidopsis thaliana GN=RSH2 PE=2 SV=1	gi|703062768|ref|XP_010086800.1| GTP pyrophosphokinase [Morus notabilis] &gt;gi|587832979|gb|EXB23810.1| GTP pyrophosphokinase [Morus notabilis]
TRINITY_DN8874_c0_g1	18.6794	53.2279	2.84955	0.0478741	1	901	-	-	-	virNOG23884	S	-	gi|976929141|gb|KVI12002.1| Protein of unknown function DUF4228 [Cynara cardunculus var. scolymus]
TRINITY_DN8879_c0_g1	6.81935	53.5746	7.85626	0.0145822	1	1444	-	-	-	-	-	-	-
TRINITY_DN8902_c0_g1	60.5599	123.811	2.04444	0.0296081	1	4443	-	-	PF13966	virNOG08235;virNOG37104	R	-	gi|731335104|ref|XP_010678560.1| PREDICTED: uncharacterized protein LOC104894092 [Beta vulgaris subsp. vulgaris]
TRINITY_DN8906_c1_g1	97.3177	198.867	2.04349	0.0164578	1	650	-	-	-	-	-	-	-
TRINITY_DN9001_c0_g2	4.03505	21.0412	5.21461	0.0214444	1	1824	GO:0005524;GO:0016887;GO:0006810;GO:0016021	-	PF01061;PF08370;PF00005	virNOG02670	Q	sp|Q949G3|PDR1_NICPL Pleiotropic drug resistance protein 1 OS=Nicotiana plumbaginifolia GN=PDR1 PE=1 SV=1	gi|976911361|gb|KVH98014.1| hypothetical protein Ccrd_023769 [Cynara cardunculus var. scolymus]
TRINITY_DN9008_c0_g1	79.0589	213.542	2.70104	0.0048047	1	1967	GO:0016740	-	PF12174	virNOG01483;virNOG18463	S	sp|Q9ZUD9|SRO2_ARATH Probable inactive poly [ADP-ribose] polymerase SRO2 OS=Arabidopsis thaliana GN=SRO2 PE=1 SV=1	gi|976920937|gb|KVI05643.1| Poly(ADP-ribose) polymerase, catalytic domain-containing protein [Cynara cardunculus var. scolymus]
TRINITY_DN9020_c1_g1	20.4228	63.9261	3.13013	0.0109241	1	1618	-	-	-	-	-	-	-
TRINITY_DN9073_c0_g1	26.6778	237.519	8.90324	0.00207676	0.796761	1050	GO:0006351	-	PF00847	virNOG21587	K	sp|Q9SZ06|EF109_ARATH Ethylene-responsive transcription factor ERF109 OS=Arabidopsis thaliana GN=ERF109 PE=1 SV=1	gi|976916439|gb|KVI01950.1| AP2/ERF domain-containing protein [Cynara cardunculus var. scolymus]
TRINITY_DN9083_c0_g1	20.8377	60.3989	2.89855	0.0170433	1	881	-	-	-	-	-	-	-
TRINITY_DN9128_c0_g1	296.949	831.699	2.80081	4.52817e-05	0.0555256	2351	-	-	-	-	-	-	-
TRINITY_DN9130_c0_g2	150.518	362.615	2.40912	0.00113615	0.548225	2045	GO:0005524;GO:0004674;GO:0006468	-	PF07714	virNOG02454	T	sp|Q06548|PBL9_ARATH Probable serine/threonine-protein kinase PBL9 OS=Arabidopsis thaliana GN=PBL9 PE=1 SV=1	gi|976920952|gb|KVI05658.1| Protein kinase, ATP binding site-containing protein [Cynara cardunculus var. scolymus]
TRINITY_DN9255_c1_g1	21.0472	213.723	10.1545	0.00122683	0.569189	1933	-	-	-	-	-	-	-
TRINITY_DN9303_c0_g1	21.1757	57.5199	2.71632	0.0171212	1	1154	-	-	PF07279	virNOG11946	S	-	gi|976904172|gb|KVH91910.1| Protein of unknown function DUF1442 [Cynara cardunculus var. scolymus]
TRINITY_DN9446_c0_g2	0	7.95183	Inf	0.0189694	1	493	-	-	-	-	-	-	-
TRINITY_DN9530_c0_g2	38.4136	226.788	5.90385	0.0274938	1	1517	GO:0016567;GO:0004842	-	PF04564	virNOG07650	O	sp|Q9SVC6|PUB22_ARATH E3 ubiquitin-protein ligase PUB22 OS=Arabidopsis thaliana GN=PUB22 PE=1 SV=1	gi|976924331|gb|KVI08314.1| Armadillo-like helical [Cynara cardunculus var. scolymus]
TRINITY_DN9595_c0_g1	93.4418	370.423	3.96422	0.000386619	0.256153	388	-	-	-	-	-	-	gi|976924674|gb|KVI08617.1| Disease resistance protein [Cynara cardunculus var. scolymus]
TRINITY_DN9763_c2_g1	590.131	1760.47	2.98319	0.00378347	1	1818	GO:0016021	-	PF05633	virNOG02232	S	-	gi|976911993|gb|KVH98616.1| hypothetical protein Ccrd_023165 [Cynara cardunculus var. scolymus]
TRINITY_DN9831_c0_g2	5.75767	23.0858	4.00957	0.033449	1	1136	-	-	-	-	-	-	-
TRINITY_DN9838_c0_g1	52.9076	109.021	2.0606	0.0305751	1	811	GO:0048500;GO:0005488	K03104	-	virNOG22749	U	sp|O04421|SRP14_ARATH Signal recognition particle 14 kDa protein OS=Arabidopsis thaliana GN=SRP14 PE=2 SV=2	gi|976923751|gb|KVI08002.1| Signal recognition particle, SRP14 subunit [Cynara cardunculus var. scolymus]
TRINITY_DN9935_c0_g1	471.738	1682.55	3.56671	0.0335473	1	976	-	-	PF13912	virNOG19434;virNOG22993;virNOG16076	R	sp|O22533|ZAT6_ARATH Zinc finger protein ZAT6 OS=Arabidopsis thaliana GN=ZAT6 PE=2 SV=1	gi|381140350|gb|AFF57513.1| Cys2/His2-type zinc finger protein [Chrysanthemum x morifolium]
TRINITY_DN10013_c0_g1	443.505	1100.06	2.48038	0.00128929	0.586944	3367	-	K14508	PF11900;PF12313;PF00651;PF13637	virNOG01450	R	sp|Q8L746|NPR3_ARATH Regulatory protein NPR3 OS=Arabidopsis thaliana GN=NPR3 PE=1 SV=1	gi|49182284|gb|AAT57642.1| NIM1-like protein 1 [Helianthus annuus]
TRINITY_DN10060_c0_g1	1.32925	37.7389	28.3912	0.000893422	0.454085	562	-	K13412	-	virNOG11052	T	sp|Q6Z2M9|CDPK4_ORYSJ Calcium-dependent protein kinase 4 OS=Oryza sativa subsp. japonica GN=CPK4 PE=2 SV=1	gi|729371431|ref|XP_010548273.1| PREDICTED: calcium-dependent protein kinase 18-like isoform X1 [Tarenaya hassleriana]
TRINITY_DN10089_c0_g1	1652.64	3961.65	2.39716	0.0329486	1	2254	GO:0006952;GO:0043531	-	PF05659	virNOG13758;COG4886	ST	sp|Q9FKZ0|DRL43_ARATH Probable disease resistance protein At5g66910 OS=Arabidopsis thaliana GN=At5g66910 PE=2 SV=1	gi|976924674|gb|KVI08617.1| Disease resistance protein [Cynara cardunculus var. scolymus]
TRINITY_DN10135_c0_g1	0	6.08174	Inf	0.048681	1	1038	GO:0009570;GO:0005739;GO:0070681;GO:0030956;GO:0090305;GO:0003676;GO:0050567;GO:0005524;GO:0032543;GO:0004527	K02433	PF01425	virNOG02295;COG0154	LJ	sp|Q9LI77|GATA_ARATH Glutamyl-tRNA(Gln) amidotransferase subunit A, chloroplastic/mitochondrial OS=Arabidopsis thaliana GN=GATA PE=2 SV=1	gi|976920543|gb|KVI05265.1| Amidase [Cynara cardunculus var. scolymus]
TRINITY_DN10177_c0_g1	244.736	522.857	2.13641	0.00309963	1	1618	GO:0044267;GO:0016020;GO:0046872	K10664	PF13639	virNOG20674;virNOG20720;virNOG05692	O	sp|Q9LX93|ATL55_ARATH E3 ubiquitin-protein ligase RING1 OS=Arabidopsis thaliana GN=ATL55 PE=1 SV=1	gi|976917767|gb|KVI03127.1| Actin-binding FH2 [Cynara cardunculus var. scolymus]
TRINITY_DN10186_c0_g1	4.10315	18.6976	4.55689	0.0430786	1	1484	GO:0016021;GO:0008375	-	PF02485	virNOG13050;virNOG08841	S	-	gi|976910980|gb|KVH97644.1| Glycosyl transferase, family 14 [Cynara cardunculus var. scolymus]
TRINITY_DN10268_c0_g1	5.54646	25.9529	4.67918	0.0150581	1	687	-	-	-	-	-	-	-
TRINITY_DN10272_c0_g1	22.5784	117.729	5.21424	0.000410479	0.264866	652	-	-	-	-	-	-	-
TRINITY_DN10371_c0_g1	9.1244	76.7748	8.41424	0.0185407	1	2208	-	-	-	-	-	-	-
TRINITY_DN10420_c0_g4	21.2387	50.3076	2.36867	0.0460598	1	1757	GO:0016787;GO:0016042;GO:0016740	-	PF01734	virNOG05358	I	sp|O80959|PLP6_ARATH Patatin-like protein 6 OS=Arabidopsis thaliana GN=PLP6 PE=2 SV=1	gi|976922488|gb|KVI06883.1| Acyl transferase/acyl hydrolase/lysophospholipase [Cynara cardunculus var. scolymus]
TRINITY_DN10441_c0_g1	97.4812	389.453	3.99516	0.0378737	1	1813	-	K08472	-	virNOG07598	S	sp|Q9FI00|MLO11_ARATH MLO-like protein 11 OS=Arabidopsis thaliana GN=MLO11 PE=2 SV=1	gi|567919802|ref|XP_006451907.1| hypothetical protein CICLE_v10007869mg [Citrus clementina] &gt;gi|568820445|ref|XP_006464731.1| PREDICTED: MLO-like protein 11 isoform X2 [Citrus sinensis] &gt;gi|557555133|gb|ESR65147.1| hypothetical protein CICLE_v10007869mg [Citrus clementina] &gt;gi|641855307|gb|KDO74093.1| hypothetical protein CISIN_1g008373mg [Citrus sinensis]
TRINITY_DN10473_c0_g1	613.947	1298.11	2.11438	0.00190441	0.759766	1788	GO:0016310;GO:0016301	-	PF00454;PF00240	virNOG00334	O	sp|Q9ZPY9|P4KG4_ARATH Phosphatidylinositol 4-kinase gamma 4 OS=Arabidopsis thaliana GN=PI4KG4 PE=1 SV=1	gi|976900868|gb|KVH89029.1| Phosphatidylinositol 3-/4-kinase, catalytic domain-containing protein [Cynara cardunculus var. scolymus]
TRINITY_DN10535_c0_g1	16.3183	70.9981	4.35082	0.00045604	0.284374	2964	-	-	-	virNOG05810;KOG0017	R	sp|Q94HW2|POLR1_ARATH Retrovirus-related Pol polyprotein from transposon RE1 OS=Arabidopsis thaliana GN=RE1 PE=2 SV=1	gi|950938137|ref|XP_014522445.1| PREDICTED: uncharacterized protein LOC106778944 [Vigna radiata var. radiata]
TRINITY_DN10546_c0_g1	2.39261	19.8024	8.2765	0.0075348	1	745	-	K03715	-	virNOG00648	H	sp|Q9FZL4|MGDG_SOYBN Probable monogalactosyldiacylglycerol synthase, chloroplastic OS=Glycine max GN=MGD A PE=2 SV=1	gi|976903922|gb|KVH91674.1| Diacylglycerol glucosyltransferase, N-terminal [Cynara cardunculus var. scolymus]
TRINITY_DN10654_c0_g1	114.63	261.322	2.27971	0.0385785	1	1959	GO:0045735	-	PF00190	virNOG09232	S	sp|Q6K508|GLUD1_ORYSJ Glutelin type-D 1 OS=Oryza sativa subsp. japonica GN=GLUD1 PE=2 SV=1	gi|976916245|gb|KVI01770.1| 11-S seed storage protein, plant [Cynara cardunculus var. scolymus]
TRINITY_DN10726_c0_g2	6.80727	24.1149	3.54252	0.0434564	1	2245	-	-	-	virNOG34174	S	-	gi|976927954|gb|KVI11278.1| Transposase, MuDR, plant [Cynara cardunculus var. scolymus]
TRINITY_DN10867_c2_g1	118.201	681.27	5.76364	0.000315482	0.223935	1042	-	-	-	-	-	-	-
TRINITY_DN10889_c0_g1	286.641	1050.49	3.66483	0.0321699	1	909	-	-	PF05553	virNOG25328;euNOG22815	S	-	gi|976928921|gb|KVI11802.1| Protein of unknown function DUF761, plant [Cynara cardunculus var. scolymus]
TRINITY_DN10921_c0_g1	4.39889	56.8549	12.9248	0.0361342	1	1861	-	-	-	-	-	-	-
TRINITY_DN10981_c0_g1	23.3215	227.38	9.74979	0.00727056	1	869	-	-	PF00847	virNOG21587	K	sp|Q9SZ06|EF109_ARATH Ethylene-responsive transcription factor ERF109 OS=Arabidopsis thaliana GN=ERF109 PE=1 SV=1	gi|976905665|gb|KVH93290.1| AP2/ERF domain-containing protein [Cynara cardunculus var. scolymus]
TRINITY_DN10987_c0_g1	39.1166	97.1624	2.48391	0.0102161	1	2510	GO:0016020	-	-	-	-	-	gi|976928613|gb|KVI11540.1| hypothetical protein Ccrd_010048 [Cynara cardunculus var. scolymus]
TRINITY_DN11069_c2_g1	0.996936	19.0046	19.063	0.0192495	1	1860	-	-	PF13855;PF12799;PF00560	virNOG01078;COG4886;virNOG30261	TSR	sp|Q9LJS0|RLP42_ARATH Receptor like protein 42 OS=Arabidopsis thaliana GN=RLP42 PE=1 SV=1	gi|976926721|gb|KVI10573.1| Leucine-rich repeat-containing protein [Cynara cardunculus var. scolymus]
TRINITY_DN11122_c1_g1	67.8845	299.05	4.40527	0.0264296	1	2014	GO:0005524;GO:0004674;GO:0006468;GO:0007165;GO:0009268	K12761	PF03822;PF00069	virNOG06801	T	sp|O22932|CIPKB_ARATH CBL-interacting serine/threonine-protein kinase 11 OS=Arabidopsis thaliana GN=CIPK11 PE=1 SV=1	gi|976918553|gb|KVI03727.1| Calcium/calmodulin-dependent/calcium-dependent protein kinase [Cynara cardunculus var. scolymus]
TRINITY_DN11125_c0_g1	6.08293	65.0194	10.6888	1.37872e-06	0.00310024	1181	-	-	-	-	-	-	-
TRINITY_DN11190_c0_g1	4.40393	18.9686	4.30721	0.0438015	1	561	-	-	-	virNOG24349	S	-	gi|566243887|ref|XP_006371597.1| hypothetical protein POPTR_0019s13510g [Populus trichocarpa] &gt;gi|566243906|ref|XP_006371599.1| hypothetical protein POPTR_0019s13530g [Populus trichocarpa] &gt;gi|550317476|gb|ERP49394.1| hypothetical protein POPTR_0019s13510g [Populus trichocarpa] &gt;gi|550317478|gb|ERP49396.1| hypothetical protein POPTR_0019s13530g [Populus trichocarpa]
TRINITY_DN11337_c0_g1	3.70609	17.6736	4.76881	0.0455763	1	1001	-	-	-	-	-	-	-
TRINITY_DN11398_c1_g1	81.0518	162.301	2.00244	0.0302256	1	1173	GO:0033743;GO:0055114	-	-	virNOG19592	S	sp|Q9STN5|Y4833_ARATH Uncharacterized protein At4g08330, chloroplastic OS=Arabidopsis thaliana GN=At4g08330 PE=1 SV=1	gi|976924830|gb|KVI08762.1| Mss4-like protein [Cynara cardunculus var. scolymus]
TRINITY_DN11521_c0_g1	48.568	97.3543	2.0045	0.0438188	1	2953	GO:0055114;GO:0016491;GO:0016021	-	PF11309;PF08030	virNOG01268	PQ	sp|P92949|FRO2_ARATH Ferric reduction oxidase 2 OS=Arabidopsis thaliana GN=FRO2 PE=1 SV=2	gi|976922775|gb|KVI07135.1| FAD-binding 8, partial [Cynara cardunculus var. scolymus]
TRINITY_DN11810_c0_g1	114.313	339.332	2.96845	0.000303608	0.223062	616	GO:0004553;GO:0005975	-	-	virNOG07037;COG2273	GR	sp|Q38910|XTH23_ARATH Probable xyloglucan endotransglucosylase/hydrolase protein 23 OS=Arabidopsis thaliana GN=XTH23 PE=2 SV=1	gi|590122376|gb|AHL27141.1| putative cell wall xyloglucan endotransglucosylase/hydrolase 23 protein, partial [Taraxacum officinale]
TRINITY_DN11837_c0_g1	1.66156	36.4911	21.962	0.00186479	0.749367	1088	-	-	PF04525	virNOG17687	S	sp|Q9ZVI6|LOR8_ARATH Protein LURP-one-related 8 OS=Arabidopsis thaliana GN=At2g38640 PE=2 SV=1	gi|976497369|gb|KVD98177.1| LURP1-like domain-containing protein [Cynara cardunculus var. scolymus]
TRINITY_DN11964_c0_g1	3.4194	18.5032	5.41123	0.0282312	1	2563	-	-	-	virNOG03831	S	-	gi|147807584|emb|CAN75358.1| hypothetical protein VITISV_034344 [Vitis vinifera]
TRINITY_DN12008_c0_g1	358.575	724.1	2.01938	0.00475191	1	1432	GO:0030170;GO:0008483;GO:0042218;GO:0016847	K01762	PF00155	virNOG02623	E	sp|P31531|1A1C_SOYBN 1-aminocyclopropane-1-carboxylate synthase OS=Glycine max GN=ACS1 PE=2 SV=1	gi|30039240|gb|AAP14019.1|AF380836_1 putative ACC synthase 1 [Lactuca sativa]
TRINITY_DN12031_c0_g1	117.499	286.377	2.43727	0.0235249	1	1147	GO:0046872	K11274	PF13639	virNOG04936	O	sp|P0CH30|RING1_GOSHI E3 ubiquitin-protein ligase RING1 OS=Gossypium hirsutum GN=RING1 PE=1 SV=1	gi|976911853|gb|KVH98488.1| Zinc finger, RING/FYVE/PHD-type [Cynara cardunculus var. scolymus]
TRINITY_DN12151_c1_g2	14.9367	57.6157	3.85731	0.00246384	0.870614	1653	-	-	-	virNOG11594	S	-	gi|976918924|gb|KVI04076.1| hypothetical protein Ccrd_017617, partial [Cynara cardunculus var. scolymus]
TRINITY_DN12205_c0_g2	171.067	398.674	2.33052	0.00958687	1	1307	-	-	-	-	-	-	-
TRINITY_DN12323_c0_g1	20.9932	59.6538	2.84158	0.0270748	1	1206	-	-	-	virNOG05011	KL	-	gi|976898798|gb|KVH87633.1| Helicase, C-terminal [Cynara cardunculus var. scolymus]
TRINITY_DN12336_c0_g1	0	12.0328	Inf	0.00204747	0.796761	1267	-	-	-	COG2801;virNOG15679	RL	-	gi|1029007120|ref|XP_016667437.1| PREDICTED: uncharacterized protein LOC107887711 [Gossypium hirsutum]
TRINITY_DN12392_c0_g1	3.74299	61.9953	16.563	0.0359638	1	1407	GO:0055114;GO:0046872;GO:0050589	K05277	PF03171;PF14226	virNOG14479	H	sp|P51092|LDOX_PETHY Leucoanthocyanidin dioxygenase OS=Petunia hybrida GN=ANT17 PE=2 SV=1	gi|308035500|dbj|BAJ21536.1| anthocyanidin synthase [Dahlia pinnata]
TRINITY_DN12425_c0_g2	2.0026	121.916	60.8792	0.00171962	0.708915	1714	GO:0005506;GO:0016021;GO:0016705;GO:0020037;GO:0004497;GO:0055114	-	PF00067	virNOG05878	Q	sp|Q9FMV7|C94B1_ARATH Cytochrome P450 94B1 OS=Arabidopsis thaliana GN=CYP94B1 PE=2 SV=1	gi|976911496|gb|KVH98145.1| cytochrome P450 [Cynara cardunculus var. scolymus]
TRINITY_DN12425_c0_g1	1.67733	105.893	63.1318	0.000148254	0.132545	1617	GO:0016021;GO:0016705;GO:0005506;GO:0004497;GO:0055114;GO:0020037	-	PF00067	virNOG05878	Q	sp|Q9FMV7|C94B1_ARATH Cytochrome P450 94B1 OS=Arabidopsis thaliana GN=CYP94B1 PE=2 SV=1	gi|976911496|gb|KVH98145.1| cytochrome P450 [Cynara cardunculus var. scolymus]
TRINITY_DN12467_c0_g1	17.6264	64.7201	3.67176	0.0021683	0.81409	867	-	K07513	-	virNOG07912;virNOG31453	I	sp|Q56WD9|THIK2_ARATH 3-ketoacyl-CoA thiolase 2, peroxisomal OS=Arabidopsis thaliana GN=PED1 PE=1 SV=2	gi|802716858|ref|XP_012085152.1| PREDICTED: 3-ketoacyl-CoA thiolase 2, peroxisomal [Jatropha curcas] &gt;gi|643713748|gb|KDP26413.1| hypothetical protein JCGZ_17571 [Jatropha curcas]
TRINITY_DN12543_c0_g1	41.5452	155.484	3.74253	6.38764e-05	0.0707455	659	-	-	-	-	-	-	-
TRINITY_DN12826_c0_g1	8.83603	33.7875	3.82383	0.0146818	1	1024	-	-	-	-	-	-	-
TRINITY_DN12883_c0_g1	42.475	92.4018	2.17544	0.0379979	1	599	-	-	-	-	-	-	-
TRINITY_DN12906_c0_g2	14.8824	44.7892	3.00954	0.0199098	1	776	GO:0005622;GO:0016042;GO:0004871;GO:0004435;GO:0035556	K05857	PF00388;PF09279	virNOG00340	I	sp|Q944C1|PLCD4_ARATH Phosphoinositide phospholipase C 4 OS=Arabidopsis thaliana GN=PLC4 PE=2 SV=2	gi|976929039|gb|KVI11905.1| C2 calcium-dependent membrane targeting [Cynara cardunculus var. scolymus]
TRINITY_DN13138_c0_g1	7.24291	40.0612	5.53109	0.00137411	0.608854	763	GO:0005634;GO:0003700;GO:0003677;GO:0006355	-	PF00847	virNOG10158;virNOG17335	K	sp|Q9FJ93|DRE1D_ARATH Dehydration-responsive element-binding protein 1D OS=Arabidopsis thaliana GN=DREB1D PE=2 SV=1	gi|976926255|gb|KVI10124.1| AP2/ERF domain-containing protein [Cynara cardunculus var. scolymus]
TRINITY_DN13164_c0_g1	11.6116	33.2562	2.86405	0.048143	1	1744	GO:0005516;GO:0046872;GO:0043231;GO:0005388;GO:0005887;GO:0070588;GO:0005524	K01537	PF14380	virNOG01632	P	sp|Q9SZR1|ACA10_ARATH Calcium-transporting ATPase 10, plasma membrane-type OS=Arabidopsis thaliana GN=ACA10 PE=1 SV=2	gi|976928944|gb|KVI11821.1| hypothetical protein Ccrd_009747 [Cynara cardunculus var. scolymus]
TRINITY_DN13273_c1_g1	64.2511	324.139	5.04488	0.0212117	1	1551	-	K00327	-	virNOG08230	C	sp|Q9SB48|NCPR1_ARATH NADPH--cytochrome P450 reductase 1 OS=Arabidopsis thaliana GN=ATR1 PE=1 SV=1	gi|763747269|gb|KJB14708.1| hypothetical protein B456_002G138900 [Gossypium raimondii]
TRINITY_DN13486_c0_g1	17.8156	44.9587	2.52355	0.0408808	1	874	-	-	-	-	-	-	-
TRINITY_DN13564_c0_g1	21.9532	59.8084	2.72436	0.0171879	1	839	-	-	-	-	-	-	-
TRINITY_DN13756_c0_g1	5.38342	21.7188	4.03439	0.0422508	1	521	-	-	-	-	-	-	-
TRINITY_DN13862_c0_g1	95.927	1588.49	16.5593	0.00346459	1	1119	-	-	PF03168	virNOG16407	S	sp|Q9ZVD2|NHL13_ARATH NDR1/HIN1-like protein 13 OS=Arabidopsis thaliana GN=NHL13 PE=2 SV=1	gi|976923794|gb|KVI08024.1| Late embryogenesis abundant protein, LEA-14 [Cynara cardunculus var. scolymus]
TRINITY_DN13879_c0_g1	59.5962	123.268	2.06839	0.0238504	1	1435	-	-	-	virNOG18759	S	sp|Q9SLL2|BIG1B_ARATH Protein BIG GRAIN 1-like B OS=Arabidopsis thaliana GN=At1g54200 PE=2 SV=1	gi|976915607|gb|KVI01512.1| hypothetical protein Ccrd_020216 [Cynara cardunculus var. scolymus]
TRINITY_DN13960_c1_g2	1.34669	18.6542	13.8518	0.00315536	1	995	-	-	-	-	-	-	-
TRINITY_DN13982_c0_g2	0.664624	8.97646	13.5061	0.0480263	1	1547	-	-	-	-	-	-	-
TRINITY_DN14038_c0_g1	11.2585	40.4015	3.58854	0.0464856	1	858	GO:0004017;GO:0005524;GO:0046939	K00939	PF00406	virNOG10859	F	sp|Q84JF7|KAD6C_ARATH Probable adenylate kinase 6, chloroplastic OS=Arabidopsis thaliana GN=At2g39270 PE=2 SV=1	gi|976922556|gb|KVI06937.1| hypothetical protein Ccrd_014724 [Cynara cardunculus var. scolymus]
TRINITY_DN14267_c0_g1	8.53022	217.946	25.5499	6.48016e-07	0.00165814	1217	GO:0005524;GO:0004674;GO:0006468	-	PF00069	virNOG11632	T	sp|O80888|M3K17_ARATH Mitogen-activated protein kinase kinase kinase 17 OS=Arabidopsis thaliana GN=MAPKKK17 PE=1 SV=1	gi|976925136|gb|KVI09050.1| Protein kinase, ATP binding site-containing protein [Cynara cardunculus var. scolymus]
TRINITY_DN14318_c0_g1	8.11371	35.3159	4.35262	0.00731444	1	1173	-	-	-	virNOG23261	S	-	gi|763760265|gb|KJB27519.1| hypothetical protein B456_005G219700 [Gossypium raimondii]
TRINITY_DN14550_c0_g1	0	7.31534	Inf	0.043505	1	1103	-	-	-	-	-	-	-
TRINITY_DN14573_c0_g1	0	9.9171	Inf	0.043449	1	1487	-	-	-	-	-	-	-
TRINITY_DN14680_c0_g1	280.233	599.302	2.13859	0.0216139	1	1659	GO:0016021;GO:0003333;GO:0015171	K15015	PF01490	COG0814;virNOG00890	E	sp|F4J1Q9|AVT1I_ARATH Amino acid transporter AVT1I OS=Arabidopsis thaliana GN=AVT1I PE=3 SV=1	gi|976905036|gb|KVH92685.1| Amino acid transporter, transmembrane, partial [Cynara cardunculus var. scolymus]
TRINITY_DN14722_c0_g3	142.54	640.834	4.49582	0.00196925	0.781433	1543	GO:0006468;GO:0005737;GO:0004702;GO:0000166	-	PF00069	virNOG09909	T	sp|Q9ZVP5|M3K18_ARATH Mitogen-activated protein kinase kinase kinase 18 OS=Arabidopsis thaliana GN=MAPKKK18 PE=1 SV=1	gi|976900821|gb|KVH88985.1| Protein kinase, ATP binding site-containing protein [Cynara cardunculus var. scolymus]
TRINITY_DN14900_c0_g2	27.3237	65.3081	2.39016	0.0272414	1	2817	-	-	PF07727	NOG125284;KOG0017;virNOG00819	SR	sp|Q9ZT94|POLR2_ARATH Retrovirus-related Pol polyprotein from transposon RE2 OS=Arabidopsis thaliana GN=RE2 PE=4 SV=1	gi|731347418|ref|XP_010684978.1| PREDICTED: uncharacterized protein LOC104899479 [Beta vulgaris subsp. vulgaris]
TRINITY_DN14901_c0_g1	10.5868	33.4738	3.16183	0.0355844	1	1736	GO:0016020	-	-	virNOG04823	S	sp|Q9SY57|P2A10_ARATH Protein PHLOEM PROTEIN 2-LIKE A10 OS=Arabidopsis thaliana GN=PP2A10 PE=2 SV=1	gi|976925018|gb|KVI08937.1| BSD-like protein [Cynara cardunculus var. scolymus]
TRINITY_DN15088_c0_g1	17.3938	53.8349	3.09507	0.010882	1	845	GO:0005618;GO:0048046;GO:0004553;GO:0042546;GO:0016762;GO:0010411;GO:0071555	K08235	PF00722;PF06955	NOG129657;COG2273;virNOG39332;virNOG07037	GRS	sp|Q38911|XTH15_ARATH Xyloglucan endotransglucosylase/hydrolase protein 15 OS=Arabidopsis thaliana GN=XTH15 PE=1 SV=1	gi|47115349|emb|CAE12269.1| putative xyloglucan endotransglucosylase / hydrolase [Lactuca sativa]
TRINITY_DN15209_c0_g2	8.90782	32.4766	3.64585	0.0181077	1	1600	-	-	-	-	-	-	-
TRINITY_DN15227_c0_g1	1.68605	13.6859	8.11714	0.0297105	1	455	-	-	-	-	-	-	-
TRINITY_DN15512_c0_g1	2.38925	29.7917	12.469	0.000289097	0.216691	558	-	-	-	KOG2998;virNOG03041	S	-	gi|747107103|ref|XP_011101856.1| PREDICTED: ELMO domain-containing protein A-like isoform X1 [Sesamum indicum] &gt;gi|747107105|ref|XP_011101857.1| PREDICTED: ELMO domain-containing protein A-like isoform X1 [Sesamum indicum]
TRINITY_DN15561_c0_g1	27.995	78.6446	2.80924	0.0492128	1	845	GO:0000139;GO:0071555;GO:0016021;GO:0045489;GO:0047262	K13648	-	virNOG11123	G	sp|Q8GWT1|GAUTE_ARATH Probable galacturonosyltransferase 14 OS=Arabidopsis thaliana GN=GAUT14 PE=2 SV=1	gi|1012122349|ref|XP_015962709.1| PREDICTED: probable galacturonosyltransferase 14 [Arachis duranensis]
TRINITY_DN15709_c0_g1	6.11279	30.7381	5.0285	0.00715073	1	1571	GO:0016020;GO:0003824	K10526	-	virNOG03720	I	sp|Q84P21|4CLL5_ARATH 4-coumarate--CoA ligase-like 5 OS=Arabidopsis thaliana GN=4CLL5 PE=1 SV=2	gi|728822909|gb|KHG05050.1| 4-coumarate--CoA ligase-like 5 [Gossypium arboreum]
TRINITY_DN15749_c0_g1	4.44083	45.3958	10.2224	0.0326498	1	1792	-	-	-	-	-	-	-
TRINITY_DN16055_c0_g2	9.83666	31.3038	3.18236	0.0364073	1	2062	-	-	-	-	-	-	-
TRINITY_DN16077_c0_g1	161.033	468.244	2.90776	0.0188416	1	830	GO:0005737;GO:0046914;GO:0030001;GO:0046916	-	-	virNOG26225;virNOG26060	SR	sp|Q9SSF0|HIP16_ARATH Heavy metal-associated isoprenylated plant protein 16 OS=Arabidopsis thaliana GN=HIPP16 PE=2 SV=1	gi|976926720|gb|KVI10572.1| hypothetical protein Ccrd_011009 [Cynara cardunculus var. scolymus]
TRINITY_DN16149_c0_g1	27.9034	127.683	4.57588	0.000403209	0.26478	660	GO:0016020	-	-	virNOG35454;virNOG24669	S	-	gi|976920681|gb|KVI05395.1| hypothetical protein Ccrd_016256 [Cynara cardunculus var. scolymus]
TRINITY_DN16259_c0_g2	1.33797	13.2942	9.93607	0.0230925	1	998	-	-	-	-	-	-	-
TRINITY_DN16348_c0_g1	4.69967	20.5889	4.38093	0.0375917	1	1495	-	-	-	COG1657;virNOG27367;virNOG29348;virNOG37331	IR	-	gi|802555480|ref|XP_012065458.1| PREDICTED: uncharacterized protein LOC105628624 [Jatropha curcas]
TRINITY_DN16375_c0_g1	2.36812	15.2701	6.44819	0.0332251	1	1117	-	-	-	-	-	-	-
TRINITY_DN16554_c1_g1	661.134	1526.47	2.30886	0.000463883	0.286854	2161	-	-	PF04601	virNOG05698	S	-	gi|976920882|gb|KVI05591.1| Actin cross-linking [Cynara cardunculus var. scolymus]
TRINITY_DN16652_c0_g1	0.680391	18.8135	27.651	0.00075842	0.407816	1148	-	-	PF13516;PF12799	KOG0619;COG4886;virNOG01078;virNOG15625	STR	sp|Q9LJS0|RLP42_ARATH Receptor like protein 42 OS=Arabidopsis thaliana GN=RLP42 PE=1 SV=1	gi|645253308|ref|XP_008232518.1| PREDICTED: receptor-like protein 12 [Prunus mume]
TRINITY_DN16682_c0_g3	9.79775	44.3175	4.52323	0.0423348	1	813	-	-	-	virNOG02826	R	-	gi|901817160|gb|KMZ71137.1| NAD dependent epimerase/dehydratase family protein [Zostera marina]
TRINITY_DN16799_c0_g1	0	8.99001	Inf	0.0103761	1	1518	-	-	-	-	-	-	-
TRINITY_DN16922_c0_g1	1.35542	13.8443	10.2141	0.0197145	1	782	-	-	-	-	-	-	-
TRINITY_DN16969_c0_g1	2335.66	5103.93	2.18522	0.000935918	0.469255	2589	-	-	-	virNOG02085;virNOG34395	R	sp|Q9FNK5|FB285_ARATH F-box protein At5g46170 OS=Arabidopsis thaliana GN=At5g46170 PE=2 SV=1	gi|976923791|gb|KVI08022.1| F-box domain, cyclin-like protein [Cynara cardunculus var. scolymus]
TRINITY_DN17019_c0_g1	3.42108	17.8709	5.22377	0.0337036	1	443	-	-	-	-	-	-	-
TRINITY_DN17092_c1_g1	3.40531	17.1431	5.03421	0.0406507	1	828	GO:0005992;GO:0003825	K16055	-	virNOG07194	G	sp|Q9SYM4|TPS1_ARATH Alpha,alpha-trehalose-phosphate synthase [UDP-forming] 1 OS=Arabidopsis thaliana GN=TPS1 PE=1 SV=1	gi|976901376|gb|KVH89427.1| Glycosyl transferase, family 20 [Cynara cardunculus var. scolymus]
TRINITY_DN17128_c0_g1	1.71758	12.6496	7.36478	0.041389	1	742	-	K08472	-	virNOG06831	S	sp|O22757|MLO8_ARATH MLO-like protein 8 OS=Arabidopsis thaliana GN=MLO8 PE=1 SV=2	gi|629090232|gb|KCW56485.1| hypothetical protein EUGRSUZ_I02212 [Eucalyptus grandis]
TRINITY_DN17397_c0_g1	6.75661	109.561	16.2154	0.0144318	1	1320	GO:0016021;GO:0045552;GO:0050662;GO:0009718;GO:0055114	K13082	PF01370	virNOG01099	Q	sp|P51103|DFRA_CALCH Dihydroflavonol 4-reductase OS=Callistephus chinensis GN=F PE=2 SV=1	gi|156708231|gb|ABU93477.1| dihydroflavonol 4-reductase [Helianthus annuus]
TRINITY_DN17439_c0_g1	980.092	2842.86	2.90061	0.0391783	1	1655	-	-	-	virNOG17462	S	-	gi|697176791|ref|XP_009597346.1| PREDICTED: uncharacterized protein LOC104093322 [Nicotiana tomentosiformis] &gt;gi|1025280947|ref|XP_016497859.1| PREDICTED: uncharacterized protein LOC107816641 [Nicotiana tabacum]
TRINITY_DN17559_c0_g1	6.78949	47.2565	6.96024	0.000213226	0.171983	2732	-	-	-	-	-	-	-
TRINITY_DN17915_c0_g1	40.1522	114.498	2.85159	0.00273328	0.93467	2658	GO:0005488	-	-	NOG06833;virNOG08281;KOG0017	SR	sp|Q9FNL8|PTR4_ARATH Protein NRT1/ PTR FAMILY 5.3 OS=Arabidopsis thaliana GN=NPF5.3 PE=2 SV=1	gi|976907751|gb|KVH95027.1| hypothetical protein Ccrd_002904 [Cynara cardunculus var. scolymus]
TRINITY_DN17924_c0_g1	9.1717	45.0828	4.91542	0.00288166	0.963215	2144	GO:0016705;GO:0016021;GO:0005506;GO:0055114;GO:0004497;GO:0020037	-	PF00067	virNOG08478	Q	sp|Q9ZUX1|C94C1_ARATH Cytochrome P450 94C1 OS=Arabidopsis thaliana GN=CYP94C1 PE=1 SV=1	gi|976902770|gb|KVH90707.1| cytochrome P450 [Cynara cardunculus var. scolymus]
TRINITY_DN18071_c0_g1	212.398	735.109	3.46099	4.74079e-05	0.0558398	4190	-	-	-	virNOG23722	S	-	gi|976904524|gb|KVH92200.1| Pathogenic type III effector avirulence factor Avr cleavage site-containing protein [Cynara cardunculus var. scolymus]
TRINITY_DN18106_c1_g1	2.04117	37.1491	18.1999	0.0326827	1	2589	GO:0005524;GO:0006468;GO:0004674;GO:0048544;GO:0016021	-	PF07714;PF01453;PF08276;PF00954	virNOG04742	T	sp|O81906|B120_ARATH G-type lectin S-receptor-like serine/threonine-protein kinase B120 OS=Arabidopsis thaliana GN=B120 PE=2 SV=1	gi|976910175|gb|KVH96965.1| Apple-like protein [Cynara cardunculus var. scolymus]
TRINITY_DN18110_c0_g1	8.82027	28.8737	3.27356	0.0399625	1	615	-	-	-	-	-	-	-
TRINITY_DN18239_c0_g1	6.44141	22.7825	3.53688	0.0494833	1	952	-	-	-	-	-	-	-
TRINITY_DN18240_c0_g1	3.74635	27.5626	7.3572	0.0275478	1	675	-	-	-	-	-	-	-
TRINITY_DN18732_c0_g1	5.43944	25.5285	4.69321	0.0160604	1	1251	-	-	-	-	-	-	-
TRINITY_DN18905_c0_g1	10.4835	53.5833	5.1112	0.000733705	0.397406	1096	-	-	-	virNOG02826	R	-	gi|460397884|ref|XP_004244495.1| PREDICTED: uncharacterized protein At1g32220, chloroplastic [Solanum lycopersicum]
TRINITY_DN18942_c0_g1	15.3915	54.2447	3.52433	0.00477727	1	1691	-	-	-	-	-	-	-
TRINITY_DN19042_c0_g1	43.4978	88.948	2.04489	0.0411976	1	1990	GO:0008233;GO:0006508	K01369	PF01650	virNOG06144	O	sp|P49042|VPE_RICCO Vacuolar-processing enzyme OS=Ricinus communis PE=1 SV=1	gi|976908274|gb|KVH95500.1| Peptidase C13, legumain [Cynara cardunculus var. scolymus]
TRINITY_DN19538_c1_g5	68.4741	243.352	3.55392	0.0025303	0.881508	2930	-	-	-	-	-	-	-
TRINITY_DN19587_c0_g2	3.07132	16.92	5.50903	0.0347475	1	1187	-	-	-	-	-	-	-
TRINITY_DN19739_c2_g1	0	6.07761	Inf	0.0487456	1	493	-	-	-	-	-	-	-
TRINITY_DN19900_c0_g1	246.329	497.503	2.01967	0.0359554	1	2403	-	-	PF04564	virNOG09253	O	sp|Q9FXA4|PUB26_ARATH U-box domain-containing protein 26 OS=Arabidopsis thaliana GN=PUB26 PE=2 SV=1	gi|976905660|gb|KVH93285.1| Armadillo-like helical [Cynara cardunculus var. scolymus]
TRINITY_DN20110_c0_g1	0	11.2638	Inf	0.00296999	0.977244	613	-	-	-	-	-	-	-
TRINITY_DN20211_c0_g1	1.35374	12.8596	9.49933	0.0440976	1	605	-	-	-	-	-	-	-
TRINITY_DN20415_c0_g1	1.36414	14.1279	10.3566	0.01658	1	785	-	-	-	-	-	-	-
TRINITY_DN20463_c0_g1	209.093	533.043	2.54931	0.00053313	0.321633	1705	GO:0005524;GO:0006468;GO:0004674;GO:0007165	K12761	PF03822;PF00069	virNOG06801;virNOG15052	T	sp|Q9LZW4|CIPKE_ARATH CBL-interacting serine/threonine-protein kinase 14 OS=Arabidopsis thaliana GN=CIPK14 PE=1 SV=1	gi|976918028|gb|KVI03260.1| hypothetical protein Ccrd_018443 [Cynara cardunculus var. scolymus]
TRINITY_DN20496_c0_g1	238.434	542.177	2.27391	0.0173671	1	1485	GO:0043169;GO:0004721	K14803	PF00481	COG0631;virNOG11570	T	sp|Q6AUQ4|P2C47_ORYSJ Probable protein phosphatase 2C 47 OS=Oryza sativa subsp. japonica GN=Os05g0134200 PE=2 SV=1	gi|976901631|gb|KVH89654.1| hypothetical protein Ccrd_008357 [Cynara cardunculus var. scolymus]
TRINITY_DN20604_c0_g1	3.38787	20.5003	6.0511	0.0157553	1	735	-	-	-	-	-	-	-
TRINITY_DN20768_c0_g1	7.49806	25.9798	3.46487	0.0409478	1	1101	-	-	-	virNOG06873	P	-	-
TRINITY_DN20861_c0_g1	0	6.51442	Inf	0.0369027	1	1009	-	-	-	-	-	-	-
TRINITY_DN20891_c0_g1	1.32925	13.0494	9.81714	0.0496335	1	644	-	-	-	-	-	-	-
TRINITY_DN20892_c0_g2	13.9026	42.1747	3.03359	0.0208418	1	1565	-	-	-	virNOG01814	R	sp|Q8L736|SKI11_ARATH F-box/kelch-repeat protein SKIP11 OS=Arabidopsis thaliana GN=SKIP11 PE=1 SV=2	gi|976911091|gb|KVH97750.1| Galactose oxidase, beta-propeller [Cynara cardunculus var. scolymus]
TRINITY_DN20994_c0_g1	0.341035	11.9218	34.9576	0.00684828	1	1218	-	-	-	-	-	-	-
TRINITY_DN21193_c0_g1	18.282	47.7478	2.61174	0.0339878	1	1378	-	-	-	-	-	-	-
TRINITY_DN21619_c0_g2	0.680391	11.2679	16.5609	0.0187243	1	697	-	-	-	virNOG25178;poaNOG23839;virNOG36256;euNOG21365	R	-	gi|113205142|gb|AAT40504.2| Polyprotein, putative [Solanum demissum]
TRINITY_DN21749_c0_g1	5.82778	47.5829	8.16484	9.32425e-05	0.0922542	973	-	-	-	-	-	-	-
TRINITY_DN21879_c0_g1	0	6.3171	Inf	0.0421128	1	591	-	-	-	-	-	-	-
TRINITY_DN21879_c0_g3	0.348079	8.62725	24.7853	0.0349808	1	764	-	-	-	-	-	-	-
TRINITY_DN22295_c0_g1	1.37118	990.642	722.472	0.0497961	1	800	-	-	-	-	-	-	-
TRINITY_DN22349_c0_g1	5.16148	20.3053	3.934	0.0480799	1	922	GO:0006468;GO:0004674;GO:0005524	-	-	virNOG00759	T	sp|Q9SII6|PIX13_ARATH Probable serine/threonine-protein kinase PIX13 OS=Arabidopsis thaliana GN=PIX13 PE=1 SV=2	gi|351726644|ref|NP_001235086.1| protein kinase [Glycine max] &gt;gi|223452418|gb|ACM89536.1| protein kinase [Glycine max] &gt;gi|734433625|gb|KHN46866.1| Putative serine/threonine-protein kinase Cx32, chloroplastic [Glycine soja] &gt;gi|947064871|gb|KRH14014.1| hypothetical protein GLYMA_14G001300 [Glycine max] &gt;gi|947064872|gb|KRH14015.1| hypothetical protein GLYMA_14G001300 [Glycine max]
TRINITY_DN22484_c0_g2	0.341035	12.6177	36.9984	0.00502404	1	1221	-	-	PF00010	virNOG30310;virNOG04643	K	sp|Q9T072|BH025_ARATH Transcription factor bHLH25 OS=Arabidopsis thaliana GN=BHLH25 PE=2 SV=2	gi|976904761|gb|KVH92420.1| Myc-type, basic helix-loop-helix (bHLH) domain-containing protein [Cynara cardunculus var. scolymus]
TRINITY_DN22485_c0_g1	1.33797	21.9842	16.431	0.000988959	0.492521	1859	-	-	PF00078	virNOG01327	R	sp|P08548|LIN1_NYCCO LINE-1 reverse transcriptase homolog OS=Nycticebus coucang PE=3 SV=1	gi|1012336425|gb|KYP47726.1| Transposon TX1 uncharacterized [Cajanus cajan]
TRINITY_DN22733_c3_g1	0	7.25259	Inf	0.0253717	1	510	-	-	-	-	-	-	-
TRINITY_DN23251_c0_g3	0	7.66793	Inf	0.0207441	1	458	-	-	-	-	-	-	-
TRINITY_DN23331_c0_g1	0.682069	28.9372	42.4256	0.0238833	1	1460	-	-	-	-	-	-	-
TRINITY_DN23578_c0_g1	0	9.20276	Inf	0.0404523	1	1725	GO:0016021;GO:0006886;GO:0005783	-	-	virNOG20980	S	-	gi|976921595|gb|KVI06278.1| hypothetical protein Ccrd_015376 [Cynara cardunculus var. scolymus]
TRINITY_DN23587_c0_g1	0	11.6842	Inf	0.00577461	1	960	-	-	-	virNOG33276;NOG37336;virNOG04055	S	sp|Q058N0|IQM5_ARATH IQ domain-containing protein IQM5 OS=Arabidopsis thaliana GN=IQM5 PE=2 SV=1	gi|976921203|gb|KVI05903.1| hypothetical protein Ccrd_015779 [Cynara cardunculus var. scolymus]
TRINITY_DN23674_c1_g1	534.125	1938.39	3.62909	1.42741e-07	0.000504385	1161	GO:0006355;GO:0003677;GO:0003700;GO:0005634	-	PF00847	virNOG19548;virNOG11598	K	sp|Q84QC2|ERF17_ARATH Ethylene-responsive transcription factor ERF017 OS=Arabidopsis thaliana GN=ERF017 PE=2 SV=1	gi|976906632|gb|KVH94049.1| AP2/ERF domain-containing protein [Cynara cardunculus var. scolymus]
TRINITY_DN23796_c0_g1	1349.2	4358.46	3.2304	0.0108181	1	1848	GO:0003824	-	-	COG0631;virNOG01720	T	sp|O80871|P2C25_ARATH Probable protein phosphatase 2C 25 OS=Arabidopsis thaliana GN=At2g30020 PE=1 SV=1	gi|976906707|gb|KVH94117.1| hypothetical protein Ccrd_003853 [Cynara cardunculus var. scolymus]
TRINITY_DN23846_c0_g1	0.341035	13.4103	39.3223	0.0269292	1	481	-	-	-	-	-	-	-
TRINITY_DN23860_c0_g1	14.3275	41.3455	2.88575	0.0290084	1	773	-	-	PF01582	virNOG10093;COG4886	TS	sp|Q40392|TMVRN_NICGU TMV resistance protein N OS=Nicotiana glutinosa GN=N PE=1 SV=1	gi|7381247|gb|AAF61452.1|AF139523_1 disease-resistance protein NRSA1 [Tagetes erecta]
TRINITY_DN24373_c1_g1	6.77205	24.8861	3.67482	0.0394974	1	1523	-	K03006	PF00665	virNOG39982;virNOG08281	R	sp|P10978|POLX_TOBAC Retrovirus-related Pol polyprotein from transposon TNT 1-94 OS=Nicotiana tabacum PE=2 SV=1	gi|147788024|emb|CAN69340.1| hypothetical protein VITISV_032634 [Vitis vinifera]
TRINITY_DN24495_c0_g2	38.8682	112.447	2.89303	0.00186679	0.749367	1223	GO:0006351	K09286	-	virNOG10158;virNOG17335	K	sp|P93835|DRE1B_ARATH Dehydration-responsive element-binding protein 1B OS=Arabidopsis thaliana GN=DREB1B PE=1 SV=2	gi|976781408|gb|KVG73624.1| AP2/ERF domain-containing protein, partial [Cynara cardunculus var. scolymus]
TRINITY_DN25001_c0_g2	0.689114	9.67158	14.0348	0.0387294	1	819	-	-	-	-	-	-	-
TRINITY_DN25561_c0_g2	0	8.91406	Inf	0.011386	1	695	-	-	-	virNOG25547;COG2801	LR	sp|P20825|POL2_DROME Retrovirus-related Pol polyprotein from transposon 297 OS=Drosophila melanogaster GN=pol PE=3 SV=1	gi|1012116369|ref|XP_015961212.1| PREDICTED: uncharacterized protein LOC107485213 [Arachis duranensis]
TRINITY_DN25615_c0_g1	10.2176	34.8251	3.40834	0.0233971	1	1149	-	-	-	-	-	-	-
TRINITY_DN25679_c0_g1	38.6525	122.685	3.17405	0.0408311	1	2381	-	K14487	PF03321	virNOG03990	R	sp|O82333|GH31_ARATH Probable indole-3-acetic acid-amido synthetase GH3.1 OS=Arabidopsis thaliana GN=GH3.1 PE=2 SV=1	gi|976905700|gb|KVH93320.1| GH3 auxin-responsive promoter [Cynara cardunculus var. scolymus]
TRINITY_DN26214_c1_g1	0	6.64093	Inf	0.0354187	1	1548	-	-	-	-	-	-	-
TRINITY_DN26618_c0_g1	5.08969	22.7911	4.47791	0.0455956	1	1777	-	-	-	virNOG14379	S	-	gi|976908331|gb|KVH95552.1| Armadillo [Cynara cardunculus var. scolymus]
TRINITY_DN26621_c0_g1	75.0118	151.472	2.01931	0.0228957	1	923	-	-	-	-	-	-	-
TRINITY_DN26673_c0_g2	155.684	340.167	2.18498	0.00338839	1	1488	GO:0008270	-	PF01428	virNOG19813	R	sp|Q67YE6|SAP12_ARATH Zinc finger AN1 domain-containing stress-associated protein 12 OS=Arabidopsis thaliana GN=SAP12 PE=2 SV=2	gi|976925440|gb|KVI09345.1| Zinc finger, AN1-type [Cynara cardunculus var. scolymus]
TRINITY_DN26770_c2_g1	0	7.59801	Inf	0.0212132	1	622	-	-	-	-	-	-	-
TRINITY_DN26835_c1_g1	9.33306	60.7505	6.50917	0.0429076	1	840	GO:0016020;GO:0009738;GO:0004864;GO:0005737;GO:0005634;GO:0010427;GO:0004872;GO:0080163	K14496	PF10604	virNOG05648	R	sp|O80920|PYL4_ARATH Abscisic acid receptor PYL4 OS=Arabidopsis thaliana GN=PYL4 PE=1 SV=1	gi|976920084|gb|KVI04830.1| Polyketide cyclase/dehydrase [Cynara cardunculus var. scolymus]
TRINITY_DN27470_c0_g1	4.41433	26.7507	6.05996	0.0425994	1	778	-	-	-	-	-	-	-
TRINITY_DN27543_c0_g1	914.187	2096.28	2.29306	0.0486801	1	2036	GO:0016021;GO:0016192;GO:0006886;GO:0005484;GO:0005622;GO:0061025	K08486	PF00804;PF05739	virNOG02064;virNOG00955	U	sp|Q9ZSD4|SY121_ARATH Syntaxin-121 OS=Arabidopsis thaliana GN=SYP121 PE=1 SV=1	gi|976902628|gb|KVH90567.1| Syntaxin/epimorphin, conserved site-containing protein [Cynara cardunculus var. scolymus]
TRINITY_DN27574_c0_g1	0.664624	10.1145	15.2184	0.0311346	1	888	-	-	-	-	-	-	-
TRINITY_DN27803_c0_g1	7.18856	32.7224	4.55201	0.00877946	1	1183	-	-	-	-	-	-	-
TRINITY_DN27849_c0_g1	1.34502	26.2831	19.5411	0.00017949	0.151353	855	-	-	-	-	-	-	-
TRINITY_DN28361_c0_g4	1.71926	28.5058	16.5802	0.000159095	0.13889	1825	-	-	-	-	-	-	-
TRINITY_DN28878_c0_g1	0	349.416	Inf	0.0346666	1	1561	GO:0009987;GO:0008152;GO:0005488;GO:0016491;GO:0050896	K00430	PF00141	virNOG03162;virNOG00074;virNOG09169	G	sp|Q43735|PER27_ARATH Peroxidase 27 OS=Arabidopsis thaliana GN=PER27 PE=1 SV=1	gi|567910407|ref|XP_006447517.1| hypothetical protein CICLE_v10017908mg [Citrus clementina] &gt;gi|568830874|ref|XP_006469708.1| PREDICTED: peroxidase 27 [Citrus sinensis] &gt;gi|557550128|gb|ESR60757.1| hypothetical protein CICLE_v10017908mg [Citrus clementina]
TRINITY_DN28885_c0_g1	12.9741	35.9776	2.77304	0.0496001	1	1076	-	-	-	-	-	-	-
TRINITY_DN28900_c0_g1	0.332312	12.188	36.6763	0.00600562	1	599	-	-	-	-	-	-	-
TRINITY_DN29773_c0_g2	0.680391	11.2515	16.5368	0.0232783	1	2324	GO:0016020;GO:0016310;GO:0000166;GO:0004672	K07198	PF03822	virNOG06895;virNOG27458	T	sp|Q5W736|CIPKI_ORYSJ CBL-interacting protein kinase 18 OS=Oryza sativa subsp. japonica GN=CIPK18 PE=2 SV=1	gi|526117946|ref|NP_001268154.1| CBL-interacting protein kinase 07 [Vitis vinifera] &gt;gi|731398629|ref|XP_010653329.1| PREDICTED: CBL-interacting protein kinase 07 isoform X1 [Vitis vinifera] &gt;gi|147843535|emb|CAN81218.1| hypothetical protein VITISV_040419 [Vitis vinifera] &gt;gi|229609815|gb|ACQ83523.1| CBL-interacting protein kinase 07 [Vitis vinifera]
TRINITY_DN30058_c0_g1	35.0605	429.83	12.2597	1.39451e-16	5.17397e-12	1317	-	K13464	PF06200	virNOG22805	K	sp|Q93ZM9|TIF9_ARATH Protein TIFY 9 OS=Arabidopsis thaliana GN=TIFY9 PE=1 SV=1	gi|976908517|gb|KVH95735.1| CO/COL/TOC1, conserved site-containing protein [Cynara cardunculus var. scolymus]
TRINITY_DN30476_c0_g1	0.680391	9.04123	13.2883	0.0472209	1	761	-	K17592	-	virNOG01851	S	-	gi|976912532|gb|KVH99011.1| Histidine kinase-like ATPase, ATP-binding domain-containing protein [Cynara cardunculus var. scolymus]
TRINITY_DN30562_c0_g1	119.934	253.36	2.11249	0.00747676	1	2561	-	-	-	virNOG08166	S	-	gi|976922749|gb|KVI07110.1| hypothetical protein Ccrd_014531 [Cynara cardunculus var. scolymus]
TRINITY_DN30614_c0_g1	8.68037	76.4644	8.80888	0.0126365	1	1421	GO:0016747;GO:0009058	K00660	PF00195;PF02797	virNOG10548	H	sp|Q8RVK9|CHS_CANSA Naringenin-chalcone synthase OS=Cannabis sativa GN=CHS PE=1 SV=1	gi|302563109|dbj|BAJ14518.1| chalcone synthase type 4 [Dahlia pinnata] &gt;gi|303304900|dbj|BAJ14769.1| chalcone synthase type 2 [Dahlia pinnata]
TRINITY_DN31039_c0_g1	432.022	1122.07	2.59725	0.0239423	1	571	-	-	-	-	-	-	-
TRINITY_DN31144_c0_g1	0.341035	10.0808	29.5594	0.0173838	1	570	-	-	-	-	-	-	-
TRINITY_DN31396_c0_g1	0	7.95887	Inf	0.0176563	1	703	-	-	-	-	-	-	-
TRINITY_DN31404_c1_g1	3.71481	17.9128	4.82199	0.0378293	1	912	-	-	-	-	-	-	gi|976900189|gb|KVH88438.1| Protein of unknown function DUF3633 [Cynara cardunculus var. scolymus]
TRINITY_DN31675_c0_g1	214.363	471.65	2.20024	0.00231602	0.838342	2542	-	-	PF01426;PF05641	virNOG13014	R	-	gi|976910970|gb|KVH97634.1| Agenet-like domain-containing protein [Cynara cardunculus var. scolymus]
TRINITY_DN31690_c0_g1	10.8453	47.2968	4.36102	0.00280187	0.945058	375	-	-	-	-	-	-	-
TRINITY_DN31730_c0_g1	1.36951	15.6422	11.4218	0.00994561	1	2428	-	-	-	-	-	-	-
TRINITY_DN32022_c0_g1	59.1625	218.891	3.69982	0.0112393	1	3091	GO:0004451;GO:0019752	K01637	PF00463	virNOG11106	C	sp|P49297|ACEA_SOLLC Isocitrate lyase OS=Solanum lycopersicum PE=2 SV=1	gi|976919042|gb|KVI04184.1| Isocitrate lyase [Cynara cardunculus var. scolymus]
TRINITY_DN32491_c0_g1	1.32925	15.633	11.7607	0.0100333	1	802	-	-	-	-	-	-	-
TRINITY_DN32566_c0_g1	351.971	989.591	2.81157	3.16923e-05	0.0419952	2295	-	-	-	virNOG22043	R	-	gi|976920745|gb|KVI05457.1| hypothetical protein Ccrd_016235 [Cynara cardunculus var. scolymus]
TRINITY_DN32626_c0_g1	1.35542	38.4043	28.3339	0.0130253	1	1310	-	-	-	virNOG20639;virNOG19434	RK	sp|O22533|ZAT6_ARATH Zinc finger protein ZAT6 OS=Arabidopsis thaliana GN=ZAT6 PE=2 SV=1	gi|422001683|dbj|BAM66957.1| Zinc finger protein [Chrysanthemum x morifolium]
TRINITY_DN33031_c1_g1	1.32925	13.954	10.4977	0.0196309	1	1396	-	-	-	-	-	-	-
TRINITY_DN33521_c0_g2	4.44418	18.7972	4.22961	0.0492023	1	569	-	-	-	-	-	-	-
TRINITY_DN34266_c0_g1	6.45919	23.1549	3.5848	0.0482327	1	2403	-	-	-	-	-	-	-
TRINITY_DN34271_c0_g1	13.9167	44.6943	3.21157	0.034838	1	2842	-	-	PF01344	virNOG10307	R	sp|Q9C6Z0|FBK17_ARATH F-box/kelch-repeat protein At1g30090 OS=Arabidopsis thaliana GN=At1g30090 PE=2 SV=1	gi|976910682|gb|KVH97356.1| Galactose oxidase, beta-propeller [Cynara cardunculus var. scolymus]
TRINITY_DN34523_c0_g1	440.757	1902.49	4.31641	0.00511896	1	2548	-	K13464	PF09425;PF06200	virNOG10152	S	sp|Q84R94|TI10A_ORYSJ Protein TIFY 10a OS=Oryza sativa subsp. japonica GN=TIFY10A PE=1 SV=1	gi|976921121|gb|KVI05823.1| CO/COL/TOC1, conserved site-containing protein [Cynara cardunculus var. scolymus]
TRINITY_DN35237_c0_g1	1.0127	14.059	13.8826	0.0360281	1	2980	-	-	-	-	-	-	gi|976915653|gb|KVI01541.1| MULE transposase domain-containing protein, partial [Cynara cardunculus var. scolymus]
TRINITY_DN35352_c0_g1	1.00566	13.9141	13.8358	0.0237852	1	1287	-	-	-	-	-	-	-
TRINITY_DN35532_c0_g1	0	6.02928	Inf	0.0495091	1	603	-	-	-	-	-	-	-
TRINITY_DN35926_c0_g1	5.07023	31.3461	6.18239	0.00355335	1	1774	GO:0008270;GO:0016021;GO:0019706	K16675	-	virNOG12682	R	sp|Q9M1K5|ZDH13_ARATH Probable protein S-acyltransferase 4 OS=Arabidopsis thaliana GN=PAT04 PE=2 SV=1	gi|976929341|gb|KVI12192.1| Zinc finger, DHHC-type, palmitoyltransferase, partial [Cynara cardunculus var. scolymus]
TRINITY_DN36002_c3_g1	0.341035	14.5475	42.6569	0.00220769	0.819108	727	-	-	-	virNOG39769;NOG123811;virNOG01327;KOG1075	RS	-	gi|1012341861|gb|KYP53060.1| hypothetical protein KK1_025062 [Cajanus cajan]
TRINITY_DN36307_c0_g1	4.37608	20.5171	4.68847	0.0327248	1	1203	-	-	-	-	-	-	-
TRINITY_DN36307_c0_g2	11.8705	34.4605	2.90305	0.0476178	1	2786	-	-	PF03732	virNOG35762;virNOG15679;virNOG10973;virNOG28323	RSU	-	gi|971562647|ref|XP_015167281.1| PREDICTED: uncharacterized protein LOC107061865 [Solanum tuberosum]
TRINITY_DN36614_c0_g1	955.106	2180.99	2.28351	0.000514637	0.313022	969	GO:0005488	-	PF01754;PF01428	virNOG20703	R	sp|Q9LHJ8|SAP5_ARATH Zinc finger A20 and AN1 domain-containing stress-associated protein 5 OS=Arabidopsis thaliana GN=SAP5 PE=2 SV=1	gi|976910357|gb|KVH97062.1| Zinc finger, A20-type [Cynara cardunculus var. scolymus]
TRINITY_DN37393_c0_g1	3.42276	22.3705	6.53582	0.00943759	1	1142	-	-	-	-	-	-	-
TRINITY_DN37784_c0_g2	0.348079	9.90693	28.4617	0.0247225	1	872	-	-	-	-	-	-	-
TRINITY_DN39437_c0_g1	3.41236	19.4467	5.69891	0.0204598	1	1926	-	K01102	-	virNOG04685	T	sp|Q9FKX4|P2C79_ARATH Probable protein phosphatase 2C 79 OS=Arabidopsis thaliana GN=At5g66080 PE=2 SV=1	gi|697186228|ref|XP_009602153.1| PREDICTED: probable protein phosphatase 2C 60 [Nicotiana tomentosiformis] &gt;gi|697186230|ref|XP_009602154.1| PREDICTED: probable protein phosphatase 2C 60 [Nicotiana tomentosiformis]
TRINITY_DN39485_c0_g1	1.0127	11.3449	11.2026	0.0289834	1	822	-	-	-	virNOG26749	S	-	gi|976904442|gb|KVH92130.1| hypothetical protein Ccrd_005839 [Cynara cardunculus var. scolymus]
TRINITY_DN39519_c0_g1	0	7.80562	Inf	0.0399867	1	769	-	-	-	-	-	-	-
TRINITY_DN41259_c0_g1	62.6155	143.378	2.28982	0.0095781	1	1217	-	K09286	-	virNOG22807;virNOG21205	K	sp|Q9SXS8|ERF3_TOBAC Ethylene-responsive transcription factor 3 OS=Nicotiana tabacum GN=ERF3 PE=2 SV=1	gi|976926540|gb|KVI10401.1| AP2/ERF domain-containing protein [Cynara cardunculus var. scolymus]
TRINITY_DN42399_c0_g1	0	16.3472	Inf	0.0101917	1	1066	GO:0005488	-	PF13947	virNOG06535	T	sp|Q9SA25|WAKLG_ARATH Wall-associated receptor kinase-like 8 OS=Arabidopsis thaliana GN=WAKL8 PE=2 SV=1	gi|976924507|gb|KVI08465.1| Concanavalin A-like lectin/glucanase, subgroup [Cynara cardunculus var. scolymus]
TRINITY_DN42425_c0_g1	1.36078	16.6917	12.2663	0.00647248	1	2065	-	-	-	-	-	-	-
TRINITY_DN43293_c0_g1	0.348079	13.1759	37.8532	0.00959101	1	776	-	-	-	-	-	-	-
TRINITY_DN43361_c0_g2	1.00566	18.9133	18.8068	0.00156367	0.670706	1041	-	-	-	-	-	-	-
TRINITY_DN44121_c0_g1	7.18823	25.3416	3.52543	0.0423216	1	1093	-	-	-	-	-	-	-
TRINITY_DN44883_c0_g2	0	6.84665	Inf	0.0331673	1	1121	-	-	PF00917	virNOG06671	D	sp|Q9FPT1|UBP12_ARATH Ubiquitin carboxyl-terminal hydrolase 12 OS=Arabidopsis thaliana GN=UBP12 PE=1 SV=2	gi|976901719|gb|KVH89716.1| MATH-like protein [Cynara cardunculus var. scolymus]
TRINITY_DN45931_c0_g2	0.996936	11.1025	11.1366	0.0344565	1	1144	-	-	-	-	-	-	-
TRINITY_DN46179_c0_g1	0.332312	8.61371	25.9205	0.0329144	1	843	-	-	-	-	-	-	-
TRINITY_DN46335_c0_g1	0.348079	13.0762	37.5666	0.00391509	1	1172	-	-	-	-	-	-	-
TRINITY_DN46654_c0_g1	2.06566	13.5565	6.56278	0.0440624	1	1410	GO:0006355;GO:0003677;GO:0003700;GO:0005634	-	PF00847	virNOG35999;virNOG36348	K	sp|Q8L9K1|ERF99_ARATH Ethylene-responsive transcription factor 13 OS=Arabidopsis thaliana GN=ERF13 PE=2 SV=2	gi|432332458|gb|AGB07586.1| ORA [Artemisia annua]
TRINITY_DN46656_c0_g2	19.8025	55.2009	2.78758	0.0173744	1	1481	GO:0004672;GO:0000166;GO:0016310	-	PF00069	virNOG09909	T	sp|Q9ZVP5|M3K18_ARATH Mitogen-activated protein kinase kinase kinase 18 OS=Arabidopsis thaliana GN=MAPKKK18 PE=1 SV=1	gi|976808719|gb|KVG99933.1| Protein kinase, ATP binding site-containing protein, partial [Cynara cardunculus var. scolymus]
TRINITY_DN46771_c0_g1	0	11.8045	Inf	0.0386604	1	818	GO:0016021;GO:0005215;GO:0005622;GO:0006810	-	-	KOG1471;virNOG02766	I	sp|Q9M0R2|PATL5_ARATH Patellin-5 OS=Arabidopsis thaliana GN=PATL5 PE=1 SV=2	gi|976917132|gb|KVI02622.1| hypothetical protein Ccrd_019114 [Cynara cardunculus var. scolymus]
TRINITY_DN46814_c0_g1	0.696159	31.9763	45.9325	3.44145e-06	0.00672033	547	-	-	-	-	-	-	-
TRINITY_DN46834_c0_g1	0.664624	13.0401	19.6203	0.0086845	1	499	-	-	-	KOG2998;virNOG03041	S	-	gi|976910480|gb|KVH97172.1| Engulfment/cell motility, ELMO [Cynara cardunculus var. scolymus]
TRINITY_DN47106_c0_g2	4.12428	26.1773	6.34711	0.00558745	1	1215	-	-	-	virNOG04486;KOG1121	L	-	gi|970039841|ref|XP_015081266.1| PREDICTED: zinc finger BED domain-containing protein DAYSLEEPER-like [Solanum pennellii]
TRINITY_DN48783_c0_g1	19.3541	83.2684	4.30237	0.0231792	1	1699	GO:0016021;GO:0071555;GO:0047517;GO:0030244;GO:0016760	-	PF03552	virNOG03814	G	sp|Q9LFL0|CSLD2_ARATH Cellulose synthase-like protein D2 OS=Arabidopsis thaliana GN=CSLD2 PE=3 SV=1	gi|976907948|gb|KVH95185.1| Cellulose synthase [Cynara cardunculus var. scolymus]
TRINITY_DN49102_c0_g1	0	7.07875	Inf	0.0268446	1	656	GO:0006351	-	PF00847	virNOG23633;virNOG22802	K	sp|Q9FJ90|ERF25_ARATH Ethylene-responsive transcription factor ERF025 OS=Arabidopsis thaliana GN=ERF025 PE=2 SV=1	gi|976908237|gb|KVH95465.1| AP2/ERF domain-containing protein [Cynara cardunculus var. scolymus]
TRINITY_DN50875_c1_g1	0.341035	9.60267	28.1575	0.0209652	1	644	-	-	-	-	-	-	-
TRINITY_DN52735_c0_g1	0.341035	8.18807	24.0095	0.0390541	1	508	-	-	-	-	-	-	-
TRINITY_DN52893_c0_g1	0	8.92211	Inf	0.0106012	1	584	-	-	-	-	-	-	-
TRINITY_DN53430_c0_g2	3.74802	18.9213	5.04834	0.0290118	1	1248	-	-	-	-	-	-	-
TRINITY_DN53942_c0_g1	0.696159	10.0633	14.4555	0.0333741	1	546	-	-	-	-	-	-	-
TRINITY_DN54376_c0_g1	284.179	689.266	2.42547	0.000440212	0.27683	2029	GO:0046983	-	PF14215;PF00010	virNOG02776	K	sp|Q9ZPY8|AIB_ARATH Transcription factor ABA-INDUCIBLE bHLH-TYPE OS=Arabidopsis thaliana GN=AIB PE=2 SV=2	gi|976910636|gb|KVH97316.1| Myc-type, basic helix-loop-helix (bHLH) domain-containing protein [Cynara cardunculus var. scolymus]
TRINITY_DN54933_c2_g1	0	10.7992	Inf	0.0039216	1	995	-	-	-	-	-	-	-
TRINITY_DN55546_c0_g1	0.680391	12.1242	17.8195	0.0159716	1	610	-	-	-	-	-	-	-
TRINITY_DN57048_c0_g2	0.332312	9.92237	29.8586	0.018132	1	566	-	-	-	-	-	-	-
TRINITY_DN58372_c1_g1	1956.64	4584.32	2.34296	0.000319362	0.223935	2496	GO:0006355	-	PF03514	virNOG00614	K	sp|Q9LDL7|PAT1_ARATH Scarecrow-like transcription factor PAT1 OS=Arabidopsis thaliana GN=PAT1 PE=2 SV=1	gi|976926541|gb|KVI10402.1| Transcription factor GRAS [Cynara cardunculus var. scolymus]
TRINITY_DN59394_c0_g1	215.659	586.621	2.72013	0.000118526	0.111332	2197	-	K09422	PF00249	virNOG09221	K	sp|Q9FDW1|MYB44_ARATH Transcription factor MYB44 OS=Arabidopsis thaliana GN=MYB44 PE=1 SV=1	gi|976911657|gb|KVH98300.1| Homeodomain-like protein [Cynara cardunculus var. scolymus]
TRINITY_DN60567_c1_g1	4.07698	31.5877	7.74782	0.00123495	0.569189	800	-	K14487	PF03321	virNOG09400	R	sp|Q9LSQ4|GH36_ARATH Indole-3-acetic acid-amido synthetase GH3.6 OS=Arabidopsis thaliana GN=GH3.6 PE=1 SV=1	gi|302143170|emb|CBI20465.3| unnamed protein product [Vitis vinifera]
TRINITY_DN60781_c0_g1	1.0127	12.8315	12.6706	0.0170112	1	772	-	-	-	-	-	-	-
TRINITY_DN61267_c0_g1	4.02264	31.2732	7.7743	0.00135919	0.607582	590	-	-	-	-	-	-	-
TRINITY_DN62841_c0_g1	1.35542	13.9007	10.2557	0.0183584	1	605	-	-	-	-	-	-	-
TRINITY_DN62944_c2_g1	0.341035	15.527	45.5292	0.00132533	0.596038	495	-	-	-	-	-	-	-
TRINITY_DN63198_c0_g1	15.0119	59.3232	3.95175	0.00186824	0.749367	1052	-	-	-	-	-	-	-
TRINITY_DN63341_c0_g2	12.6582	36.5583	2.88811	0.0386728	1	1167	-	-	-	-	-	-	-
TRINITY_DN63553_c0_g1	2.04621	22.0836	10.7925	0.00239972	0.855314	1183	-	-	-	virNOG03301;virNOG30866;euNOG01702	SR	-	gi|976901762|gb|KVH89750.1| hypothetical protein Ccrd_008260 [Cynara cardunculus var. scolymus]
TRINITY_DN64284_c0_g1	0.348079	7.7809	22.3538	0.0461302	1	1320	-	K07195	PF03081	virNOG02224	U	-	gi|747042644|ref|XP_011079560.1| PREDICTED: exocyst complex component EXO70A1 [Sesamum indicum]
TRINITY_DN65760_c0_g2	0.689114	9.38051	13.6124	0.0411582	1	622	-	-	-	-	-	-	-
TRINITY_DN66336_c0_g2	4.44754	21.1841	4.76312	0.0261237	1	1530	GO:0016760;GO:0030244;GO:0016021;GO:0071555;GO:0009846;GO:0005794	-	PF03552	virNOG14508	R	sp|Q9SZL9|CSLD4_ARATH Cellulose synthase-like protein D4 OS=Arabidopsis thaliana GN=CSLD4 PE=2 SV=1	gi|976902671|gb|KVH90609.1| Cellulose synthase [Cynara cardunculus var. scolymus]
TRINITY_DN66388_c0_g1	0	6.26877	Inf	0.0447797	1	861	-	-	-	-	-	-	-
TRINITY_DN67496_c0_g2	481.68	1244.02	2.58267	0.000101984	0.0982823	1921	GO:0016787;GO:0006629	-	PF01764	virNOG10298	I	sp|O23522|PLA14_ARATH Phospholipase A1-Ibeta2, chloroplastic OS=Arabidopsis thaliana GN=At4g16820 PE=1 SV=2	gi|976901782|gb|KVH89766.1| Lipase, class 3 [Cynara cardunculus var. scolymus]
TRINITY_DN75387_c0_g1	16.0528	41.6981	2.59757	0.0448533	1	2113	-	-	-	virNOG20724	T	sp|Q04980|LTI65_ARATH Low-temperature-induced 65 kDa protein OS=Arabidopsis thaliana GN=LTI65 PE=2 SV=2	gi|223549907|gb|EEF51394.1| hypothetical protein RCOM_1496000 [Ricinus communis]
TRINITY_DN76104_c0_g1	5.78584	25.535	4.41335	0.0215423	1	821	-	-	-	-	-	-	-
TRINITY_DN78548_c0_g1	0	10.4024	Inf	0.00474817	1	733	-	-	-	-	-	-	-
TRINITY_DN80079_c0_g1	251.408	554.221	2.20447	0.0135501	1	937	GO:0016021;GO:0005215;GO:0006810	K09873	PF00230	virNOG04666	G	sp|Q94CS9|TIP12_ORYSJ Probable aquaporin TIP1-2 OS=Oryza sativa subsp. japonica GN=TIP1-2 PE=2 SV=1	gi|697140973|ref|XP_009624595.1| PREDICTED: aquaporin TIP1-3 [Nicotiana tomentosiformis] &gt;gi|1025310418|ref|XP_016501711.1| PREDICTED: aquaporin TIP1-3-like [Nicotiana tabacum]
TRINITY_DN80998_c0_g1	0	6.80738	Inf	0.0313585	1	718	GO:0016021	K18726	-	virNOG05342	O	sp|Q9M0N1|PUX10_ARATH Plant UBX domain-containing protein 10 OS=Arabidopsis thaliana GN=PUX10 PE=2 SV=1	gi|976908044|gb|KVH95278.1| Thioredoxin-like fold [Cynara cardunculus var. scolymus]
TRINITY_DN84439_c0_g1	29.3496	78.5908	2.67775	0.0109144	1	592	-	-	-	KOG0017;COG2132;virNOG08281	QR	-	gi|113534520|dbj|BAF06903.1| Os01g0879800 [Oryza sativa Japonica Group]
TRINITY_DN84612_c0_g1	83.1017	200.018	2.40691	0.00428916	1	1091	-	-	-	-	-	-	-
TRINITY_DN19_c4_g1	837.08	368.699	0.440458	0.00079875	0.421248	848	GO:0009733;GO:0010364	K09286	PF00847	virNOG21432	K	sp|Q9LW48|ERF5_NICSY Ethylene-responsive transcription factor 5 OS=Nicotiana sylvestris GN=ERF5 PE=2 SV=1	gi|976901792|gb|KVH89775.1| AP2/ERF domain-containing protein [Cynara cardunculus var. scolymus]
TRINITY_DN71_c0_g5	668.203	172.968	0.258856	0.0079296	1	1968	GO:0009507;GO:0000287;GO:0010333;GO:0016114	K18108	PF03936;PF01397	NOG131679;virNOG00163	RS	sp|Q94G53|QH6_ARTAN (-)-beta-pinene synthase, chloroplastic OS=Artemisia annua GN=QH6 PE=1 SV=1	gi|1004508491|gb|AMP42989.1| putative monoterpene synthase [Xanthium strumarium]
TRINITY_DN206_c1_g1	1852.94	711.503	0.383986	0.00539151	1	3171	-	-	PF07727	KOG0017;virNOG00819	R	sp|Q9ZT94|POLR2_ARATH Retrovirus-related Pol polyprotein from transposon RE2 OS=Arabidopsis thaliana GN=RE2 PE=4 SV=1	gi|731345200|ref|XP_010683797.1| PREDICTED: uncharacterized protein LOC104898410 [Beta vulgaris subsp. vulgaris]
TRINITY_DN214_c11_g1	13.6125	2.18038	0.160175	0.0478734	1	710	-	-	-	-	-	-	-
TRINITY_DN295_c0_g2	377.674	165.971	0.439457	0.00205751	0.796761	1488	-	K19042	-	virNOG05913;virNOG18164	O	sp|Q9LDD1|BRG3_ARATH Probable BOI-related E3 ubiquitin-protein ligase 3 OS=Arabidopsis thaliana GN=BRG3 PE=1 SV=1	gi|976926368|gb|KVI10234.1| Zinc finger, RING-type [Cynara cardunculus var. scolymus]
TRINITY_DN351_c0_g1	91.1762	39.9257	0.437896	0.0211826	1	1402	-	-	-	-	-	-	-
TRINITY_DN458_c17_g3	2995.56	1052.26	0.351272	1.86091e-05	0.0276177	1551	-	-	-	-	-	-	-
TRINITY_DN489_c0_g1	1785.36	762.417	0.427037	0.00267611	0.921044	2181	GO:0055114;GO:0016702	K09840	PF03055	virNOG05544	Q	sp|Q9LRR7|NCED3_ARATH 9-cis-epoxycarotenoid dioxygenase NCED3, chloroplastic OS=Arabidopsis thaliana GN=NCED3 PE=2 SV=1	gi|84579408|dbj|BAE72091.1| Lactuca sativa 9-cis-epoxycarotenoid dioxygenase 2
TRINITY_DN539_c0_g4	48.488	19.4983	0.402127	0.0409627	1	731	-	-	-	-	-	-	-
TRINITY_DN552_c2_g1	225.062	110.219	0.489729	0.0121715	1	959	-	-	-	virNOG04595;euNOG12153	S	-	gi|976925492|gb|KVI09396.1| hypothetical protein Ccrd_012225 [Cynara cardunculus var. scolymus]
TRINITY_DN555_c0_g3	50.6598	15.5611	0.307169	0.00862258	1	1041	GO:0008270;GO:0044444;GO:0005634	-	-	virNOG03726	S	-	gi|976916617|gb|KVI02121.1| hypothetical protein Ccrd_019601, partial [Cynara cardunculus var. scolymus]
TRINITY_DN602_c1_g1	54.9045	22.4913	0.409643	0.0292707	1	2015	GO:0044267;GO:0016020;GO:0046872	-	PF13639	virNOG07726	O	sp|Q940Q4|ATL13_ARATH RING-H2 finger protein ATL13 OS=Arabidopsis thaliana GN=ATL13 PE=2 SV=2	gi|976915448|gb|KVI01397.1| Zinc finger, RING/FYVE/PHD-type [Cynara cardunculus var. scolymus]
TRINITY_DN679_c5_g1	62.1889	19.5559	0.31446	0.00573292	1	939	GO:0016757	-	PF01501	virNOG05321;NOG23538	GO	sp|Q9LN68|GATL1_ARATH Probable galacturonosyltransferase-like 1 OS=Arabidopsis thaliana GN=GATL1 PE=2 SV=1	gi|976904915|gb|KVH92568.1| Glycosyl transferase, family 8 [Cynara cardunculus var. scolymus]
TRINITY_DN905_c0_g1	3886.7	1028.37	0.264586	2.31587e-08	0.000132192	2682	GO:0008270	K16285	PF14009	strNOG19694;virNOG19763	O	sp|Q9SI09|XERIC_ARATH Probable E3 ubiquitin-protein ligase XERICO OS=Arabidopsis thaliana GN=XERICO PE=1 SV=1	gi|976916547|gb|KVI02052.1| Zinc finger, RING/FYVE/PHD-type [Cynara cardunculus var. scolymus]
TRINITY_DN917_c0_g4	324.672	0	0	0.0352858	1	966	GO:0055114;GO:0016491	K08081	PF13561	virNOG01595;virNOG11038	Q	sp|P50165|TRNH_DATST Tropinone reductase homolog OS=Datura stramonium PE=2 SV=1	gi|976909285|gb|KVH96434.1| Glucose/ribitol dehydrogenase [Cynara cardunculus var. scolymus]
TRINITY_DN984_c0_g3	26.753	4.67431	0.174721	0.00803178	1	674	-	-	-	-	-	-	-
TRINITY_DN986_c0_g1	1709.39	658.462	0.385203	0.011212	1	2221	GO:0004497;GO:0016705;GO:0055114;GO:0020037;GO:0005506	K15398	PF00067	virNOG00226	Q	sp|B3RFJ6|86A22_PETHY Cytochrome P450 86A22 OS=Petunia hybrida GN=CYP86A22 PE=1 SV=1	gi|976904134|gb|KVH91875.1| cytochrome P450 [Cynara cardunculus var. scolymus]
TRINITY_DN990_c0_g1	3440.4	703.323	0.20443	9.23263e-09	7.6123e-05	3722	-	-	-	KOG0017;virNOG00819	R	sp|Q9ZT94|POLR2_ARATH Retrovirus-related Pol polyprotein from transposon RE2 OS=Arabidopsis thaliana GN=RE2 PE=4 SV=1	gi|731317712|ref|XP_010669333.1| PREDICTED: copia protein isoform X1 [Beta vulgaris subsp. vulgaris] &gt;gi|731317714|ref|XP_010669334.1| PREDICTED: copia protein isoform X1 [Beta vulgaris subsp. vulgaris] &gt;gi|731317716|ref|XP_010669335.1| PREDICTED: copia protein isoform X1 [Beta vulgaris subsp. vulgaris]
TRINITY_DN1135_c0_g2	83.267	33.5082	0.402419	0.0127122	1	1049	GO:0005488	-	PF13912	virNOG21047	K	sp|O80942|ZFP10_ARATH Zinc finger protein 10 OS=Arabidopsis thaliana GN=ZFP10 PE=2 SV=1	gi|976908021|gb|KVH95256.1| Zinc finger, C2H2 [Cynara cardunculus var. scolymus]
TRINITY_DN1153_c2_g1	43.9864	12.5277	0.284809	0.00721017	1	500	-	K08916	-	virNOG07792	R	sp|Q9XF89|CB5_ARATH Chlorophyll a-b binding protein CP26, chloroplastic OS=Arabidopsis thaliana GN=LHCB5 PE=1 SV=1	gi|976922101|gb|KVI06693.1| hypothetical protein Ccrd_014952 [Cynara cardunculus var. scolymus]
TRINITY_DN1243_c0_g1	247.79	112.736	0.454966	0.00516921	1	1258	GO:0016020	-	-	virNOG26192;virNOG25630	S	-	gi|976906336|gb|KVH93778.1| hypothetical protein Ccrd_004168 [Cynara cardunculus var. scolymus]
TRINITY_DN1269_c3_g1	94.1421	46.6186	0.495193	0.0384871	1	1080	-	-	-	-	-	-	-
TRINITY_DN1332_c1_g1	91.1654	37.5506	0.411895	0.0112241	1	1255	-	-	-	-	-	-	-
TRINITY_DN1364_c10_g1	14.6514	1.64278	0.112125	0.0179579	1	434	-	-	-	-	-	-	-
TRINITY_DN1580_c0_g2	180.856	60.4475	0.33423	0.00525	1	726	GO:0008270;GO:0016021	K16281	PF13639	NOG31818;virNOG20086	O	sp|Q9SUS5|RHA1B_ARATH E3 ubiquitin-protein ligase RHA1B OS=Arabidopsis thaliana GN=RHA1B PE=2 SV=1	gi|976902068|gb|KVH90026.1| Zinc finger, RING/FYVE/PHD-type [Cynara cardunculus var. scolymus]
TRINITY_DN1580_c0_g1	166.555	55.3814	0.332511	0.00479393	1	685	GO:0008270;GO:0016021	K16281	PF13639	virNOG20086;NOG31818	O	sp|Q9SUS4|RHA1A_ARATH Probable E3 ubiquitin-protein ligase RHA1A OS=Arabidopsis thaliana GN=RHA1A PE=2 SV=1	gi|976902068|gb|KVH90026.1| Zinc finger, RING/FYVE/PHD-type [Cynara cardunculus var. scolymus]
TRINITY_DN1606_c2_g1	117.93	15.4762	0.131232	1.93709e-07	0.000624965	1500	-	-	-	-	-	-	gi|922377464|ref|XP_013459025.1| hypothetical protein MTR_3g021185 [Medicago truncatula] &gt;gi|657392021|gb|KEH33078.1| hypothetical protein MTR_3g021185 [Medicago truncatula]
TRINITY_DN1773_c0_g2	63.3106	21.5983	0.341148	0.0216339	1	556	GO:0005618;GO:0009664;GO:0016020;GO:0005576	-	PF01357;PF03330	virNOG07797	R	sp|O22874|EXPA8_ARATH Expansin-A8 OS=Arabidopsis thaliana GN=EXPA8 PE=2 SV=1	gi|976922696|gb|KVI07062.1| Barwin-like endoglucanase [Cynara cardunculus var. scolymus]
TRINITY_DN1784_c0_g1	647.544	302.018	0.466405	0.0243439	1	648	-	-	-	virNOG10844;NOG15957;virNOG33288	S	-	gi|731355523|ref|XP_010689187.1| PREDICTED: uncharacterized protein LOC104902945 [Beta vulgaris subsp. vulgaris]
TRINITY_DN1824_c0_g1	39.5825	10.1834	0.257272	0.00864735	1	617	-	-	-	virNOG03182;NOG125056;KOG1721	KR	sp|Q944L3|IDD9_ARATH Protein indeterminate-domain 9 OS=Arabidopsis thaliana GN=IDD9 PE=2 SV=1	gi|698430542|ref|XP_009793158.1| PREDICTED: zinc finger protein NUTCRACKER-like [Nicotiana sylvestris] &gt;gi|1025077220|ref|XP_016453602.1| PREDICTED: protein indeterminate-domain 7-like [Nicotiana tabacum]
TRINITY_DN1828_c0_g2	174.971	61.4777	0.351359	0.00720145	1	1062	GO:0016021;GO:0009522;GO:0009535;GO:0046872;GO:0018298;GO:0016168;GO:0009765	K08916	-	virNOG07792	R	sp|Q9XF89|CB5_ARATH Chlorophyll a-b binding protein CP26, chloroplastic OS=Arabidopsis thaliana GN=LHCB5 PE=1 SV=1	gi|976922101|gb|KVI06693.1| hypothetical protein Ccrd_014952 [Cynara cardunculus var. scolymus]
TRINITY_DN2015_c0_g1	378.834	87.5771	0.231175	0.000225506	0.178018	636	GO:0009733	K14488	PF02519	virNOG24497	S	sp|Q9FK62|SAU24_ARATH Auxin-responsive protein SAUR24 OS=Arabidopsis thaliana GN=SAUR24 PE=2 SV=1	gi|976914215|gb|KVI00445.1| Auxin responsive SAUR protein [Cynara cardunculus var. scolymus]
TRINITY_DN2015_c0_g2	24.2047	3.41209	0.140968	0.00416441	1	387	GO:0009733	K14488	-	virNOG24497	S	-	gi|976914218|gb|KVI00448.1| Auxin responsive SAUR protein [Cynara cardunculus var. scolymus]
TRINITY_DN2054_c1_g1	104.157	51.9763	0.499019	0.037736	1	1873	GO:0008270;GO:0055114;GO:0003676;GO:0016491	-	-	KOG0017;COG2801;KOG0143;virNOG05810	QLR	sp|Q9ZT94|POLR2_ARATH Retrovirus-related Pol polyprotein from transposon RE2 OS=Arabidopsis thaliana GN=RE2 PE=4 SV=1	gi|116268426|gb|ABJ96383.1| hypothetical protein [Prunus persica]
TRINITY_DN2073_c0_g1	8.22911	0.308399	0.0374766	0.0357835	1	408	-	-	-	-	-	-	-
TRINITY_DN2105_c0_g1	1508.93	591.16	0.391774	0.00177634	0.728249	1120	-	K01602	-	virNOG17005;virNOG07808	GC	sp|Q42822|RBS_GLYTO Ribulose bisphosphate carboxylase small chain, chloroplastic OS=Glycine tomentella GN=RBCS PE=3 SV=1	gi|464595|sp|Q02980.1|RBS_MALSP RecName: Full=Ribulose bisphosphate carboxylase small chain, chloroplastic; Short=RuBisCO small subunit; Flags: Precursor &gt;gi|19581|emb|CAA46475.1| ribulose bisphosphate carboxylase [Malus sp.]
TRINITY_DN2119_c0_g2	706.624	0.345426	0.00048884	0.0361847	1	621	-	-	PF00234	virNOG23426	T	sp|Q39950|NLTP_HELAN Non-specific lipid-transfer protein OS=Helianthus annuus PE=3 SV=1	gi|337730995|gb|AEI70828.1| non-specific lipid-transfer protein [Helianthus annuus]
TRINITY_DN2148_c1_g2	82.041	8.51907	0.103839	3.49102e-07	0.00103621	1015	-	-	-	-	-	-	-
TRINITY_DN2158_c3_g1	156.718	78.201	0.498991	0.03559	1	1399	GO:0070588;GO:0005524;GO:0005887;GO:0005516;GO:0046872;GO:0005388;GO:0043231	K01537	-	virNOG01632	P	sp|Q9M2L4|ACA11_ARATH Putative calcium-transporting ATPase 11, plasma membrane-type OS=Arabidopsis thaliana GN=ACA11 PE=1 SV=1	gi|976914690|gb|KVI00787.1| Calcium-transporting P-type ATPase, N-terminal autoinhibitory domain-containing protein [Cynara cardunculus var. scolymus]
TRINITY_DN2193_c0_g1	1854.29	826.559	0.445754	0.000640922	0.3603	1404	-	-	-	KOG4197;virNOG17507	SR	-	gi|976925383|gb|KVI09291.1| hypothetical protein Ccrd_012330 [Cynara cardunculus var. scolymus]
TRINITY_DN2264_c3_g1	98.0089	34.7272	0.354327	0.00376908	1	1180	-	-	-	-	-	-	-
TRINITY_DN2391_c0_g2	1497.98	568.353	0.379412	0.0275841	1	1506	GO:0050896	-	-	virNOG24891;euNOG30591	SK	-	gi|976905350|gb|KVH92990.1| hypothetical protein Ccrd_004992 [Cynara cardunculus var. scolymus]
TRINITY_DN2490_c0_g2	25.587	7.72554	0.301932	0.0475104	1	815	-	-	-	-	-	-	-
TRINITY_DN2577_c5_g1	1560.13	489.498	0.313755	1.83185e-06	0.00388378	817	-	-	PF01344	virNOG16268	R	sp|O80582|FBK46_ARATH F-box/kelch-repeat protein At2g44130 OS=Arabidopsis thaliana GN=At2g44130 PE=2 SV=2	gi|976900728|gb|KVH88895.1| F-box domain, cyclin-like protein [Cynara cardunculus var. scolymus]
TRINITY_DN2577_c4_g1	5523.77	2714.72	0.491461	0.00779693	1	1769	-	-	PF00646;PF01344	virNOG16268	R	sp|O80582|FBK46_ARATH F-box/kelch-repeat protein At2g44130 OS=Arabidopsis thaliana GN=At2g44130 PE=2 SV=2	gi|976900728|gb|KVH88895.1| F-box domain, cyclin-like protein [Cynara cardunculus var. scolymus]
TRINITY_DN2618_c1_g2	194.728	76.8131	0.394465	0.00137845	0.608854	1736	-	K09422	-	virNOG02653	K	sp|Q9LE63|MY106_ARATH Transcription factor MYB106 OS=Arabidopsis thaliana GN=MYB106 PE=2 SV=1	gi|976916964|gb|KVI02457.1| Homeodomain-like protein, partial [Cynara cardunculus var. scolymus]
TRINITY_DN2620_c0_g3	933.812	456.551	0.488911	0.00361278	1	1795	GO:0044238;GO:0044260	-	-	virNOG25536;virNOG10320	OK	sp|Q9SUS5|RHA1B_ARATH E3 ubiquitin-protein ligase RHA1B OS=Arabidopsis thaliana GN=RHA1B PE=2 SV=1	gi|585865114|emb|CDL93467.1| GRAS family transcription factor [Helianthus annuus]
TRINITY_DN2723_c0_g1	226.899	51.6101	0.227459	1.57297e-06	0.003433	991	-	K03146	-	virNOG05676	R	sp|O23787|THI4_CITSI Thiamine thiazole synthase, chloroplastic OS=Citrus sinensis GN=THI1 PE=2 SV=1	gi|460397188|ref|XP_004244150.1| PREDICTED: thiamine thiazole synthase, chloroplastic [Solanum lycopersicum] &gt;gi|970041379|ref|XP_015082085.1| PREDICTED: thiamine thiazole synthase, chloroplastic [Solanum pennellii]
TRINITY_DN2820_c4_g1	315.737	114.002	0.361065	0.00623049	1	2754	GO:0016788	-	PF00657	virNOG08785	I	sp|Q9STM6|GDL57_ARATH GDSL esterase/lipase At3g48460 OS=Arabidopsis thaliana GN=At3g48460 PE=2 SV=1	gi|976921571|gb|KVI06255.1| hypothetical protein Ccrd_015390 [Cynara cardunculus var. scolymus]
TRINITY_DN2950_c1_g1	174.868	64.3095	0.36776	0.00105985	0.520836	527	-	-	-	virNOG26472;virNOG39926;euNOG29354	S	-	gi|976920737|gb|KVI05449.1| hypothetical protein Ccrd_016208 [Cynara cardunculus var. scolymus]
TRINITY_DN2966_c1_g1	234.114	98.5416	0.420913	0.0351132	1	2066	-	-	-	-	-	-	-
TRINITY_DN2988_c5_g2	59.2424	26.5453	0.448079	0.0481431	1	779	-	-	-	-	-	-	-
TRINITY_DN3049_c0_g1	371.789	160.972	0.432967	0.00167976	0.700262	1398	-	-	PF04520	virNOG20584	S	-	gi|976901582|gb|KVH89618.1| Senescence regulator [Cynara cardunculus var. scolymus]
TRINITY_DN3076_c0_g1	181.133	87.4202	0.48263	0.0167465	1	2132	GO:0005840;GO:0003735;GO:0006412;GO:0016021	-	-	virNOG18249	S	sp|P0C8Q9|Y5902_ARATH Uncharacterized protein At5g19025 OS=Arabidopsis thaliana GN=At5g19025 PE=2 SV=3	gi|976914052|gb|KVI00286.1| Ribosomal protein L34Ae, partial [Cynara cardunculus var. scolymus]
TRINITY_DN3142_c1_g1	21.7121	5.41349	0.24933	0.039494	1	705	-	-	-	-	-	-	gi|976924803|gb|KVI08736.1| Synaptojanin, N-terminal [Cynara cardunculus var. scolymus]
TRINITY_DN3182_c1_g1	134.996	56.6092	0.41934	0.00550822	1	1110	-	-	-	virNOG00262	R	-	gi|566208521|ref|XP_002323252.2| hypothetical protein POPTR_0016s03710g [Populus trichocarpa] &gt;gi|550320754|gb|EEF05013.2| hypothetical protein POPTR_0016s03710g [Populus trichocarpa]
TRINITY_DN3322_c0_g2	275.729	107.645	0.390401	0.000849357	0.434666	2525	GO:0008270	K16285	PF13639	virNOG19763	O	sp|Q9SI09|XERIC_ARATH Probable E3 ubiquitin-protein ligase XERICO OS=Arabidopsis thaliana GN=XERICO PE=1 SV=1	gi|976916547|gb|KVI02052.1| Zinc finger, RING/FYVE/PHD-type [Cynara cardunculus var. scolymus]
TRINITY_DN3322_c0_g1	94.7338	27.7109	0.292513	0.00101916	0.50418	1816	GO:0008270	K16285	PF13639	virNOG19763;strNOG19694	O	sp|Q9SI09|XERIC_ARATH Probable E3 ubiquitin-protein ligase XERICO OS=Arabidopsis thaliana GN=XERICO PE=1 SV=1	gi|976916547|gb|KVI02052.1| Zinc finger, RING/FYVE/PHD-type [Cynara cardunculus var. scolymus]
TRINITY_DN3425_c0_g1	67.8407	29.3319	0.432364	0.0279254	1	1606	-	-	-	-	-	-	-
TRINITY_DN3557_c1_g1	102.304	49.8271	0.487047	0.0315122	1	865	-	-	-	-	-	-	-
TRINITY_DN3758_c1_g1	80.0155	32.8485	0.410527	0.0135505	1	1598	-	-	PF00657	virNOG01674	R	sp|Q9M153|GDL61_ARATH GDSL esterase/lipase At4g01130 OS=Arabidopsis thaliana GN=At4g01130 PE=2 SV=1	gi|747045315|ref|XP_011093343.1| PREDICTED: GDSL esterase/lipase At4g01130-like [Sesamum indicum]
TRINITY_DN3794_c1_g1	182.589	83.9515	0.459783	0.0119196	1	783	-	-	-	-	-	-	-
TRINITY_DN3841_c0_g1	54.4115	22.1127	0.406397	0.0308615	1	2769	-	-	PF14309;PF14383	virNOG08271;virNOG33476	S	sp|Q9S823|LNG2_ARATH Protein LONGIFOLIA 2 OS=Arabidopsis thaliana GN=LNG2 PE=1 SV=1	gi|976858298|gb|KVH48444.1| protein of unknown function DUF4378 [Cynara cardunculus var. scolymus]
TRINITY_DN3882_c0_g1	100.06	44.0312	0.440049	0.0150523	1	614	-	-	-	-	-	-	-
TRINITY_DN3945_c2_g1	66.0849	18.2215	0.275729	0.00212198	0.803373	690	-	-	-	-	-	-	-
TRINITY_DN4212_c6_g1	38.6146	10.0199	0.259485	0.0100724	1	744	-	-	-	virNOG26903	S	sp|Q9SZG3|VQ29_ARATH VQ motif-containing protein 29 OS=Arabidopsis thaliana GN=VQ29 PE=2 SV=1	gi|1021044272|gb|KZN02053.1| hypothetical protein DCAR_010807 [Daucus carota subsp. sativus]
TRINITY_DN4301_c2_g1	161.905	72.9763	0.450735	0.00990981	1	1910	GO:0006351	-	PF00847	virNOG07969	K	sp|Q9SKT1|ERF53_ARATH Ethylene-responsive transcription factor ERF053 OS=Arabidopsis thaliana GN=ERF053 PE=1 SV=1	gi|976919108|gb|KVI04240.1| hypothetical protein Ccrd_017450 [Cynara cardunculus var. scolymus]
TRINITY_DN4350_c0_g1	101.206	47.4073	0.468423	0.0420467	1	785	-	-	-	virNOG24992	S	-	gi|976901395|gb|KVH89446.1| hypothetical protein Ccrd_008556 [Cynara cardunculus var. scolymus]
TRINITY_DN4553_c0_g2	162.537	66.3191	0.408025	0.00489439	1	692	-	-	-	-	-	-	-
TRINITY_DN4707_c0_g1	889.048	362.101	0.407291	0.00292843	0.970108	832	-	-	PF00226	virNOG25084;virNOG24331	O	sp|Q9FYB5|DNJ11_ARATH Chaperone protein dnaJ 11, chloroplastic OS=Arabidopsis thaliana GN=ATJ11 PE=1 SV=2	gi|976923441|gb|KVI07770.1| DnaJ domain-containing protein [Cynara cardunculus var. scolymus]
TRINITY_DN4775_c0_g1	119.034	59.4433	0.499382	0.028683	1	3850	GO:0008270	-	PF00092;PF00097;PF14624	virNOG08632	O	sp|Q55874|Y103_SYNY3 Uncharacterized protein sll0103 OS=Synechocystis sp. (strain PCC 6803 / Kazusa) GN=sll0103 PE=4 SV=1	gi|976922473|gb|KVI06872.1| von Willebrand factor, type A [Cynara cardunculus var. scolymus]
TRINITY_DN4892_c0_g1	98.6195	37.8801	0.384103	0.00686995	1	779	GO:0016020	-	-	virNOG23670;virNOG24558	S	sp|Q9SW07|GDU2_ARATH Protein GLUTAMINE DUMPER 2 OS=Arabidopsis thaliana GN=GDU2 PE=2 SV=1	gi|976928874|gb|KVI11760.1| hypothetical protein Ccrd_009814, partial [Cynara cardunculus var. scolymus]
TRINITY_DN5209_c0_g3	690.764	222.534	0.322156	1.02061e-05	0.0163378	1644	-	K08332	PF03224	virNOG09914	S	sp|Q9C7G1|PUB45_ARATH U-box domain-containing protein 45 OS=Arabidopsis thaliana GN=PUB45 PE=1 SV=1	gi|976917303|gb|KVI02776.1| Armadillo [Cynara cardunculus var. scolymus]
TRINITY_DN5209_c0_g2	687.831	299.557	0.43551	0.00091864	0.463726	1506	-	-	-	virNOG09237;virNOG09914	S	sp|Q9C7G1|PUB45_ARATH U-box domain-containing protein 45 OS=Arabidopsis thaliana GN=PUB45 PE=1 SV=1	gi|976904733|gb|KVH92393.1| Armadillo [Cynara cardunculus var. scolymus]
TRINITY_DN5260_c1_g1	57.6908	23.5665	0.408496	0.0463635	1	1150	-	-	PF09465	virNOG11211	D	-	gi|976903913|gb|KVH91665.1| Armadillo-type fold [Cynara cardunculus var. scolymus]
TRINITY_DN5393_c2_g2	146.7	52.2851	0.356409	0.00114069	0.548225	1983	-	-	-	virNOG08052	S	-	gi|970042422|ref|XP_015082599.1| PREDICTED: uncharacterized protein LOC107026220 [Solanum pennellii]
TRINITY_DN5393_c2_g1	23.6334	6.53411	0.276478	0.0417818	1	550	-	-	-	virNOG08052	S	-	gi|976916680|gb|KVI02181.1| hypothetical protein Ccrd_019523 [Cynara cardunculus var. scolymus]
TRINITY_DN5426_c0_g1	162.536	71.0439	0.437095	0.016356	1	1715	GO:0016021	-	-	virNOG06170	S	-	gi|976912747|gb|KVH99217.1| hypothetical protein Ccrd_022558 [Cynara cardunculus var. scolymus]
TRINITY_DN5533_c0_g1	59.8785	22.1712	0.37027	0.0163994	1	588	-	-	-	virNOG26916	R	-	gi|566154182|ref|XP_006370346.1| hypothetical protein POPTR_0001s41860g [Populus trichocarpa] &gt;gi|550349525|gb|ERP66915.1| hypothetical protein POPTR_0001s41860g [Populus trichocarpa]
TRINITY_DN5803_c0_g2	75.0675	33.0623	0.440434	0.025713	1	954	-	-	-	-	-	-	-
TRINITY_DN5849_c1_g1	237.202	104.629	0.441098	0.0414741	1	1824	GO:0016021;GO:0006633;GO:0016747	K15397	PF08392;PF08541	virNOG00803;COG3424	MQ	sp|Q9C6L5|KCS5_ARATH 3-ketoacyl-CoA synthase 5 OS=Arabidopsis thaliana GN=KCS5 PE=2 SV=1	gi|976910962|gb|KVH97626.1| hypothetical protein Ccrd_000291 [Cynara cardunculus var. scolymus]
TRINITY_DN5934_c0_g1	1815.75	756.471	0.416617	0.000222998	0.177931	2198	GO:0046872	-	-	virNOG07677	R	sp|O82199|C3H20_ARATH Zinc finger CCCH domain-containing protein 20 OS=Arabidopsis thaliana GN=At2g19810 PE=2 SV=1	gi|976929400|gb|KVI12250.1| Zinc finger, CCCH-type [Cynara cardunculus var. scolymus]
TRINITY_DN6268_c0_g1	304.15	86.4905	0.284368	7.7927e-06	0.0134479	647	-	-	-	virNOG25140	S	-	gi|976908715|gb|KVH95926.1| Protein of unknown function wound-induced [Cynara cardunculus var. scolymus]
TRINITY_DN6302_c0_g1	214.407	57.4636	0.268012	0.0295645	1	1040	GO:0016020;GO:0005618;GO:0009664;GO:0005576	-	PF03330	virNOG07797	R	sp|O22874|EXPA8_ARATH Expansin-A8 OS=Arabidopsis thaliana GN=EXPA8 PE=2 SV=1	gi|976926135|gb|KVI10008.1| Barwin-like endoglucanase [Cynara cardunculus var. scolymus]
TRINITY_DN6391_c0_g1	89.5839	34.3145	0.383043	0.00677984	1	791	-	-	-	virNOG19342	S	-	gi|976926379|gb|KVI10245.1| hypothetical protein Ccrd_011359 [Cynara cardunculus var. scolymus]
TRINITY_DN6523_c2_g1	62.6034	28.3796	0.453323	0.0417093	1	1192	-	-	PF13867	virNOG07446	S	-	gi|976921955|gb|KVI06587.1| Histone deacetylase complex subunit SAP30/SAP30-like protein [Cynara cardunculus var. scolymus]
TRINITY_DN6559_c0_g1	586.658	164.727	0.280789	7.25981e-06	0.0128265	1864	-	K08869	-	virNOG02453	R	sp|Q02981|YP109_YEAST ABC1 family protein YPL109C, mitochondrial OS=Saccharomyces cerevisiae (strain ATCC 204508 / S288c) GN=YPL109C PE=1 SV=2	gi|976916673|gb|KVI02174.1| hypothetical protein Ccrd_019459 [Cynara cardunculus var. scolymus]
TRINITY_DN6683_c1_g1	58.9775	22.6728	0.384431	0.0219596	1	1061	-	-	-	-	-	-	-
TRINITY_DN6721_c0_g2	39.0412	12.2425	0.313578	0.0224682	1	839	-	-	-	-	-	-	-
TRINITY_DN6772_c0_g1	1007.97	385.512	0.382463	0.0132997	1	1173	-	-	PF00197	virNOG17981	R	sp|Q9LMU2|KTI2_ARATH Kunitz trypsin inhibitor 2 OS=Arabidopsis thaliana GN=KTI2 PE=2 SV=1	gi|659066983|ref|XP_008437058.1| PREDICTED: miraculin-like [Cucumis melo]
TRINITY_DN6947_c0_g1	2017.13	891.158	0.441794	0.000570119	0.333115	2093	-	-	PF02701	virNOG09727;virNOG16444;virNOG07685	KR	sp|Q8W1E3|CDF1_ARATH Cyclic dof factor 1 OS=Arabidopsis thaliana GN=CDF1 PE=1 SV=2	gi|1009327700|gb|AMR68978.1| DOF transcription factor 3, partial [Chrysanthemum x morifolium]
TRINITY_DN6978_c3_g1	21.7685	5.69001	0.261387	0.0462758	1	767	-	-	-	-	-	-	-
TRINITY_DN7104_c0_g1	84.7753	41.7848	0.492889	0.0438466	1	1426	GO:0019538;GO:0010467;GO:0005622	-	-	virNOG13414;virNOG16196	SR	sp|Q9XIN8|FB119_ARATH F-box protein At2g27310 OS=Arabidopsis thaliana GN=At2g27310 PE=2 SV=1	gi|976922430|gb|KVI06840.1| F-box domain, cyclin-like protein [Cynara cardunculus var. scolymus]
TRINITY_DN7314_c0_g1	76.1916	24.3216	0.319216	0.00398151	1	577	-	K03146	-	virNOG05676;COG1635	RH	sp|F6H9A9|THI41_VITVI Thiamine thiazole synthase 1, chloroplastic OS=Vitis vinifera GN=THI1-1 PE=3 SV=1	gi|595898938|ref|XP_007213805.1| hypothetical protein PRUPE_ppa007657mg [Prunus persica] &gt;gi|462409670|gb|EMJ15004.1| hypothetical protein PRUPE_ppa007657mg [Prunus persica]
TRINITY_DN7340_c1_g1	39.7534	13.8453	0.34828	0.0301903	1	964	-	-	-	-	-	-	-
TRINITY_DN7387_c0_g1	89.6122	36.4196	0.406413	0.0118285	1	1014	GO:0046872;GO:0016020	K19040	PF13639	virNOG12199	O	sp|Q6NQG7|ATL78_ARATH RING-H2 finger protein ATL78 OS=Arabidopsis thaliana GN=ATL78 PE=2 SV=1	gi|976904512|gb|KVH92188.1| Zinc finger, RING/FYVE/PHD-type [Cynara cardunculus var. scolymus]
TRINITY_DN7564_c0_g1	81.2496	29.535	0.363509	0.00640839	1	1577	-	-	-	-	-	-	-
TRINITY_DN7611_c1_g1	28.1767	8.82848	0.313326	0.0461025	1	1513	-	-	-	-	-	-	-
TRINITY_DN7623_c0_g2	52.9773	17.4074	0.328582	0.0111858	1	905	GO:0016021	K03542	-	virNOG10593	R	sp|Q9XF91|PSBS_ARATH Photosystem II 22 kDa protein, chloroplastic OS=Arabidopsis thaliana GN=PSBS PE=2 SV=1	gi|976902697|gb|KVH90635.1| Chlorophyll a/b binding protein domain-containing protein [Cynara cardunculus var. scolymus]
TRINITY_DN7669_c0_g1	522.255	251.409	0.481391	0.0468418	1	2110	-	-	PF00657	virNOG05265	R	sp|Q9SJB4|GDL34_ARATH GDSL esterase/lipase At2g04570 OS=Arabidopsis thaliana GN=At2g04570 PE=2 SV=1	gi|976926806|gb|KVI10652.1| hypothetical protein Ccrd_010940 [Cynara cardunculus var. scolymus]
TRINITY_DN7830_c1_g1	1035.37	489.517	0.472793	0.00225654	0.828982	2127	-	-	-	virNOG03160;virNOG06547	S	-	gi|976903385|gb|KVH91281.1| Protein of unknown function DUF506, plant [Cynara cardunculus var. scolymus]
TRINITY_DN7913_c0_g1	67.181	30.9321	0.46043	0.0400817	1	2047	GO:0016020;GO:0071704;GO:0016616	K00006	-	virNOG03703	C	sp|Q9SCX9|GPDA1_ARATH Glycerol-3-phosphate dehydrogenase [NAD(+)] 1, chloroplastic OS=Arabidopsis thaliana GN=DHAPRD PE=1 SV=1	gi|976905174|gb|KVH92818.1| 6-phosphogluconate dehydrogenase, C-terminal-like protein, partial [Cynara cardunculus var. scolymus]
TRINITY_DN7975_c0_g3	23.6968	0	0	0.00528071	1	356	-	-	-	-	-	-	-
TRINITY_DN8116_c1_g1	696.365	310.787	0.446299	0.00121821	0.569189	1129	GO:0006355;GO:0003700;GO:0003677;GO:0005634	K09286	PF00847	virNOG20552	K	sp|O22174|ERF08_ARATH Ethylene-responsive transcription factor ERF008 OS=Arabidopsis thaliana GN=ERF008 PE=2 SV=1	gi|976900649|gb|KVH88822.1| AP2/ERF domain-containing protein [Cynara cardunculus var. scolymus]
TRINITY_DN8150_c0_g1	85.2241	29.3608	0.344513	0.00907899	1	1296	GO:0042744;GO:0055114;GO:0004601;GO:0005576;GO:0098869;GO:0046872;GO:0020037;GO:0006979	K00430	-	virNOG11333	G	sp|Q9LT91|PER66_ARATH Peroxidase 66 OS=Arabidopsis thaliana GN=PER66 PE=2 SV=1	gi|62122339|dbj|BAD93164.1| cationic peroxidase [Zinnia violacea]
TRINITY_DN8208_c0_g1	383.983	169.961	0.442626	0.0114484	1	5115	-	-	PF07714	virNOG09345;COG2319	R	sp|Q0J7U6|TPR2_ORYSJ Protein TPR2 OS=Oryza sativa subsp. japonica GN=TPR2 PE=1 SV=1	gi|976903889|gb|KVH91644.1| Quinonprotein alcohol dehydrogenase-like-superfamily [Cynara cardunculus var. scolymus]
TRINITY_DN8240_c0_g1	79.6169	39.2808	0.493373	0.0450432	1	1166	GO:0005524;GO:0004674;GO:0006468;GO:0030246	-	PF00069	virNOG12624	T	sp|Q9LDZ5|PBL21_ARATH Probable serine/threonine-protein kinase PBL21 OS=Arabidopsis thaliana GN=PBL21 PE=1 SV=1	gi|976920450|gb|KVI05177.1| Concanavalin A-like lectin/glucanase, subgroup [Cynara cardunculus var. scolymus]
TRINITY_DN8282_c0_g1	69.7497	23.3122	0.334226	0.00624173	1	433	-	-	-	virNOG26782;virNOG26891;euNOG29305	S	-	gi|747042218|ref|XP_011077282.1| PREDICTED: uncharacterized protein LOC105161330 [Sesamum indicum]
TRINITY_DN8336_c0_g1	111.123	34.7582	0.31279	0.000829779	0.427596	2176	-	K18635	-	virNOG24099;virNOG23445	S	sp|B3H4F1|SP1L1_ARATH Protein SPIRAL1-like 1 OS=Arabidopsis thaliana GN=SP1L1 PE=2 SV=1	gi|976912821|gb|KVH99285.1| hypothetical protein Ccrd_022484, partial [Cynara cardunculus var. scolymus]
TRINITY_DN8596_c0_g1	16.1316	3.36991	0.208901	0.0461984	1	1292	GO:0016021	-	PF03381	virNOG03962	KTD	sp|Q9SLK2|ALIS3_ARATH ALA-interacting subunit 3 OS=Arabidopsis thaliana GN=ALIS3 PE=1 SV=1	gi|976920905|gb|KVI05613.1| Protein of unknown function DUF284, transmembrane eukaryotic [Cynara cardunculus var. scolymus]
TRINITY_DN8693_c1_g1	16.9655	3.50962	0.206868	0.0442636	1	1240	-	-	-	virNOG03842	S	sp|Q9LSS4|TET4_ARATH Tetraspanin-4 OS=Arabidopsis thaliana GN=TET4 PE=3 SV=1	gi|976902358|gb|KVH90305.1| Tetraspanin [Cynara cardunculus var. scolymus]
TRINITY_DN8713_c0_g1	86.4778	35.5478	0.411063	0.0134357	1	953	-	-	-	-	-	-	-
TRINITY_DN8772_c0_g1	3110.67	1286.75	0.413658	0.000211004	0.171983	2054	GO:0005622;GO:0008270	-	-	virNOG07936	K	sp|Q8RWD0|COL16_ARATH Zinc finger protein CONSTANS-LIKE 16 OS=Arabidopsis thaliana GN=COL16 PE=1 SV=2	gi|976909118|gb|KVH96294.1| CCT domain-containing protein [Cynara cardunculus var. scolymus]
TRINITY_DN8916_c1_g3	40.8728	13.4639	0.329409	0.0229864	1	1224	-	-	-	-	-	-	gi|976925931|gb|KVI09814.1| Glycoside hydrolase, catalytic domain-containing protein [Cynara cardunculus var. scolymus]
TRINITY_DN9023_c0_g1	225.637	103.602	0.459155	0.0339302	1	1666	GO:0005975;GO:0005576;GO:0071555;GO:0004650	-	PF00295	virNOG04490	R	sp|Q949Z1|PGLR4_ARATH Polygalacturonase At1g48100 OS=Arabidopsis thaliana GN=At1g48100 PE=2 SV=1	gi|976913517|gb|KVH99771.1| Glycoside hydrolase, family 28 [Cynara cardunculus var. scolymus]
TRINITY_DN9151_c0_g1	104.87	49.5705	0.472685	0.0278065	1	859	GO:0016787	-	-	-	-	-	gi|357507041|ref|XP_003623809.1| subtilisin-like serine protease [Medicago truncatula] &gt;gi|355498824|gb|AES80027.1| subtilisin-like serine protease [Medicago truncatula]
TRINITY_DN9475_c0_g1	34.7771	12.3741	0.355812	0.0472502	1	1241	-	-	-	-	-	-	-
TRINITY_DN9539_c0_g2	227.241	90.0738	0.396381	0.0167904	1	1483	GO:0016021	-	-	virNOG17150	S	-	gi|976921742|gb|KVI06413.1| hypothetical protein Ccrd_015228 [Cynara cardunculus var. scolymus]
TRINITY_DN10308_c0_g2	9.1348	0.606507	0.0663953	0.0419661	1	1303	-	-	-	-	-	-	-
TRINITY_DN10402_c0_g1	298.106	96.6301	0.324147	0.0328885	1	1918	GO:0016021	-	PF05978	virNOG03527	S	sp|Q56WD3|UN931_ARATH UNC93-like protein 1 OS=Arabidopsis thaliana GN=At1g18000 PE=2 SV=2	gi|976919702|gb|KVI04544.1| hypothetical protein Ccrd_017136 [Cynara cardunculus var. scolymus]
TRINITY_DN10490_c0_g1	96.4838	47.2035	0.489238	0.0345628	1	503	-	-	-	virNOG06082;virNOG01025;KOG1721	KR	sp|Q9LVQ7|IDD1_ARATH Protein indeterminate-domain 1 OS=Arabidopsis thaliana GN=IDD1 PE=1 SV=1	gi|848884586|ref|XP_012842557.1| PREDICTED: protein indeterminate-domain 2-like [Erythranthe guttata]
TRINITY_DN10493_c1_g1	200.926	59.5136	0.296196	4.5592e-05	0.0555256	542	-	-	-	-	-	-	-
TRINITY_DN10841_c0_g1	96.7045	46.7854	0.483797	0.0300366	1	458	GO:0055114;GO:0031408;GO:0016702;GO:0046872	K00454	PF00305	virNOG02698	E	sp|O24370|LOX21_SOLTU Linoleate 13S-lipoxygenase 2-1, chloroplastic OS=Solanum tuberosum GN=LOX2.1 PE=1 SV=1	gi|976902969|gb|KVH90897.1| Lipase/lipooxygenase, PLAT/LH2, partial [Cynara cardunculus var. scolymus]
TRINITY_DN10934_c0_g2	60.6642	13.2768	0.218858	0.00417034	1	994	GO:0016021;GO:0003743;GO:0006413	-	PF04525	virNOG18503;virNOG21809;virNOG22050	SR	sp|Q9LUM1|LOR11_ARATH Protein LURP-one-related 11 OS=Arabidopsis thaliana GN=At3g14260 PE=2 SV=1	gi|976904111|gb|KVH91852.1| Initiation factor 2B-related protein, partial [Cynara cardunculus var. scolymus]
TRINITY_DN10934_c0_g1	45.7597	11.1057	0.242697	0.00345723	1	903	GO:0003743;GO:0006413;GO:0016021	-	PF04525	virNOG22050;virNOG21809	S	sp|Q9SH27|LOR4_ARATH Protein LURP-one-related 4 OS=Arabidopsis thaliana GN=At1g63410 PE=3 SV=1	gi|976904111|gb|KVH91852.1| Initiation factor 2B-related protein, partial [Cynara cardunculus var. scolymus]
TRINITY_DN11200_c0_g1	65.5514	26.9664	0.411377	0.0203091	1	983	GO:0016021;GO:0015979;GO:0005509;GO:0019898;GO:0009654	-	PF01789	virNOG03133	S	sp|F4J7A7|PPD7_ARATH PsbP domain-containing protein 7, chloroplastic OS=Arabidopsis thaliana GN=PPD7 PE=2 SV=1	gi|720011797|ref|XP_010259674.1| PREDICTED: psbP domain-containing protein 7, chloroplastic [Nelumbo nucifera]
TRINITY_DN11230_c0_g1	86.9767	8.48015	0.0974991	3.1154e-05	0.0419952	818	-	-	-	virNOG25489;virNOG27051	S	-	gi|976901344|gb|KVH89399.1| hypothetical protein Ccrd_008609 [Cynara cardunculus var. scolymus]
TRINITY_DN11264_c0_g2	64.7388	22.2257	0.343313	0.00863777	1	1920	-	-	-	virNOG12637	S	sp|Q9SVM0|Y3078_ARATH BTB/POZ domain-containing protein At3g50780 OS=Arabidopsis thaliana GN=At3g50780 PE=2 SV=1	gi|1025202999|ref|XP_016477558.1| PREDICTED: BTB/POZ domain-containing protein At3g50780-like isoform X2 [Nicotiana tabacum] &gt;gi|1025203003|ref|XP_016477559.1| PREDICTED: BTB/POZ domain-containing protein At3g50780-like isoform X2 [Nicotiana tabacum]
TRINITY_DN11485_c0_g1	137.889	56.3613	0.408742	0.00444519	1	1750	-	-	-	virNOG09345;KOG0266	R	sp|Q0WV90|TPR1_ARATH Topless-related protein 1 OS=Arabidopsis thaliana GN=TPR1 PE=1 SV=3	gi|976912642|gb|KVH99119.1| CTLH, C-terminal LisH motif-containing protein [Cynara cardunculus var. scolymus]
TRINITY_DN11537_c0_g1	24.7992	6.91657	0.278902	0.0361031	1	803	-	K09286	PF00847	virNOG23697;virNOG34014	K	sp|O80340|ERF78_ARATH Ethylene-responsive transcription factor 4 OS=Arabidopsis thaliana GN=ERF4 PE=1 SV=1	gi|976905423|gb|KVH93060.1| AP2/ERF domain-containing protein [Cynara cardunculus var. scolymus]
TRINITY_DN11851_c0_g1	1226.89	351.082	0.286156	0.00013991	0.129775	518	-	-	PF12937	virNOG16268	R	sp|O80582|FBK46_ARATH F-box/kelch-repeat protein At2g44130 OS=Arabidopsis thaliana GN=At2g44130 PE=2 SV=2	gi|976900728|gb|KVH88895.1| F-box domain, cyclin-like protein [Cynara cardunculus var. scolymus]
TRINITY_DN12018_c0_g1	158.595	74.5195	0.469874	0.0134097	1	1125	GO:0009058;GO:0030170;GO:0003824	K14272	-	virNOG00851;COG0436	E	sp|Q9S7E9|GGT2_ARATH Glutamate--glyoxylate aminotransferase 2 OS=Arabidopsis thaliana GN=GGAT2 PE=1 SV=1	gi|823159033|ref|XP_012479346.1| PREDICTED: glutamate--glyoxylate aminotransferase 2 isoform X1 [Gossypium raimondii] &gt;gi|823159035|ref|XP_012479347.1| PREDICTED: glutamate--glyoxylate aminotransferase 2 isoform X1 [Gossypium raimondii] &gt;gi|823159037|ref|XP_012479348.1| PREDICTED: glutamate--glyoxylate aminotransferase 2 isoform X1 [Gossypium raimondii]
TRINITY_DN12093_c1_g1	82.3741	30.559	0.370978	0.00735968	1	1962	GO:0006351	-	PF08880;PF08879	virNOG07842	K	sp|O81001|GRF1_ARATH Growth-regulating factor 1 OS=Arabidopsis thaliana GN=GRF1 PE=1 SV=1	gi|976904809|gb|KVH92466.1| Glutamine-Leucine-Glutamine, QLQ [Cynara cardunculus var. scolymus]
TRINITY_DN12095_c0_g2	595.897	161.066	0.270292	6.99717e-07	0.00173075	863	-	-	PF05553	virNOG19883	S	-	gi|1021031777|gb|KZM89561.1| hypothetical protein DCAR_023076 [Daucus carota subsp. sativus]
TRINITY_DN12095_c0_g1	493.186	105.441	0.213795	1.81469e-08	0.000129102	810	-	-	PF05553	virNOG19883	S	-	gi|976921234|gb|KVI05932.1| Protein of unknown function DUF761, plant [Cynara cardunculus var. scolymus]
TRINITY_DN12171_c0_g1	77.061	22.9481	0.297791	0.00240901	0.855314	2711	-	-	-	-	-	-	-
TRINITY_DN12373_c0_g2	43.1876	11.4654	0.265478	0.00878392	1	1844	-	-	PF03110	virNOG14919	K	sp|A2YGR5|SPL12_ORYSI Squamosa promoter-binding-like protein 12 OS=Oryza sativa subsp. indica GN=SPL12 PE=2 SV=1	gi|976901118|gb|KVH89244.1| Transcription factor, SBP-box, partial [Cynara cardunculus var. scolymus]
TRINITY_DN12477_c0_g1	449.836	209.376	0.46545	0.0278358	1	1502	-	-	PF00847	virNOG15086	K	sp|Q9C7W2|ERF61_ARATH Ethylene-responsive transcription factor ERF061 OS=Arabidopsis thaliana GN=ERF061 PE=2 SV=1	gi|976908112|gb|KVH95344.1| AP2/ERF domain-containing protein, partial [Cynara cardunculus var. scolymus]
TRINITY_DN12715_c0_g1	26.1003	5.84326	0.223877	0.0162328	1	1178	-	-	-	-	-	-	-
TRINITY_DN12764_c0_g1	231.562	0	0	0.042128	1	3237	-	-	-	virNOG02825;COG1112	GMLW	-	gi|802726379|ref|XP_012086094.1| PREDICTED: uncharacterized protein LOC105645177 [Jatropha curcas] &gt;gi|802726382|ref|XP_012086095.1| PREDICTED: uncharacterized protein LOC105645177 [Jatropha curcas] &gt;gi|643713021|gb|KDP26007.1| hypothetical protein JCGZ_21040 [Jatropha curcas]
TRINITY_DN12774_c0_g1	99.2833	47.7265	0.480711	0.0324817	1	2084	-	-	PF13966	virNOG28179;KOG1075;virNOG01327	R	sp|P0C2F6|RNHX1_ARATH Putative ribonuclease H protein At1g65750 OS=Arabidopsis thaliana GN=At1g65750 PE=3 SV=1	gi|1012336425|gb|KYP47726.1| Transposon TX1 uncharacterized [Cajanus cajan]
TRINITY_DN12927_c0_g1	90.0088	43.126	0.479131	0.0362511	1	1609	-	-	PF03110	virNOG08353	K	sp|B9DI20|SP13A_ARATH Squamosa promoter-binding-like protein 13A OS=Arabidopsis thaliana GN=SPL13A PE=2 SV=1	gi|976912502|gb|KVH98982.1| Transcription factor, SBP-box [Cynara cardunculus var. scolymus]
TRINITY_DN13220_c0_g1	10.8598	0.951933	0.0876569	0.0331318	1	1073	-	-	-	virNOG09929	R	sp|O80624|MAKR4_ARATH Probable membrane-associated kinase regulator 4 OS=Arabidopsis thaliana GN=MAKR4 PE=3 SV=1	gi|976925652|gb|KVI09550.1| hypothetical protein Ccrd_012067 [Cynara cardunculus var. scolymus]
TRINITY_DN13453_c0_g1	20.3534	5.44247	0.267399	0.0453704	1	1030	-	-	-	-	-	-	-
TRINITY_DN13549_c0_g1	183.199	67.4423	0.368136	0.00119832	0.566378	1246	-	-	-	euNOG29606;KOG0670;virNOG23826	SA	-	gi|976909130|gb|KVH96305.1| hypothetical protein Ccrd_001620 [Cynara cardunculus var. scolymus]
TRINITY_DN13578_c1_g1	54.531	21.659	0.397187	0.0335888	1	4058	-	-	-	-	-	-	-
TRINITY_DN13638_c0_g1	51.021	8.50162	0.16663	0.00913372	1	727	-	-	-	-	-	-	-
TRINITY_DN14159_c0_g1	26.0273	6.21441	0.238765	0.020612	1	946	-	-	PF13716	virNOG14034	BK	sp|A7T167|GDAP2_NEMVE Protein GDAP2 homolog OS=Nematostella vectensis GN=gdap2 PE=3 SV=1	gi|976924827|gb|KVI08759.1| CRAL-TRIO domain-containing protein [Cynara cardunculus var. scolymus]
TRINITY_DN14167_c0_g1	80.3828	35.8741	0.446291	0.0331884	1	1893	GO:0004722;GO:0046872;GO:0006470	K01102	PF00481	virNOG05369;COG0631	T	sp|Q9LHJ9|P2C38_ARATH Probable protein phosphatase 2C 38 OS=Arabidopsis thaliana GN=PP2C38 PE=1 SV=1	gi|976913731|gb|KVH99974.1| Protein phosphatase 2C [Cynara cardunculus var. scolymus]
TRINITY_DN14233_c3_g1	183.064	84.0953	0.459376	0.00754932	1	722	-	-	-	-	-	-	-
TRINITY_DN14264_c1_g1	67.1415	27.4582	0.40896	0.0237866	1	1045	-	-	-	-	-	-	-
TRINITY_DN14319_c2_g1	16.374	2.52581	0.154257	0.0264938	1	721	-	-	-	-	-	-	-
TRINITY_DN14422_c0_g1	47.3806	9.87404	0.208398	0.00153481	0.666026	866	-	-	-	-	-	sp|Q2V9B0|MY1R1_SOLTU Transcription factor MYB1R1 OS=Solanum tuberosum PE=2 SV=1	-
TRINITY_DN14561_c0_g1	24.9925	2.47849	0.0991696	0.00600428	1	885	-	-	-	-	-	-	gi|976905584|gb|KVH93215.1| Myc-type, basic helix-loop-helix (bHLH) domain-containing protein [Cynara cardunculus var. scolymus]
TRINITY_DN14716_c0_g2	617.999	107.699	0.174271	8.6006e-09	7.6123e-05	894	GO:0009733	K14488	-	virNOG21620	S	sp|O65695|SAU50_ARATH Auxin-responsive protein SAUR50 OS=Arabidopsis thaliana GN=SAUR50 PE=1 SV=1	gi|976918983|gb|KVI04129.1| Auxin responsive SAUR protein [Cynara cardunculus var. scolymus]
TRINITY_DN14716_c0_g1	71.1457	13.7459	0.193207	8.53143e-05	0.0879271	1068	GO:0009733	K14488	PF02519	virNOG21620;virNOG23111	S	sp|O65695|SAU50_ARATH Auxin-responsive protein SAUR50 OS=Arabidopsis thaliana GN=SAUR50 PE=1 SV=1	gi|976918983|gb|KVI04129.1| Auxin responsive SAUR protein [Cynara cardunculus var. scolymus]
TRINITY_DN14884_c0_g1	80.95	37.1987	0.459527	0.0335362	1	5013	-	-	-	virNOG08281;virNOG10663	R	sp|P10978|POLX_TOBAC Retrovirus-related Pol polyprotein from transposon TNT 1-94 OS=Nicotiana tabacum PE=2 SV=1	gi|47824985|gb|AAT38758.1| Putative gag-pol polyprotein, identical [Solanum demissum]
TRINITY_DN14974_c0_g1	131.928	64.8869	0.491835	0.0265711	1	2936	GO:0009507;GO:0031425;GO:0008270	-	PF13041;PF14432;PF01535	virNOG09183	R	sp|Q7Y211|PP285_ARATH Pentatricopeptide repeat-containing protein At3g57430, chloroplastic OS=Arabidopsis thaliana GN=PCMP-H81 PE=2 SV=2	gi|976928446|gb|KVI11421.1| Pentatricopeptide repeat-containing protein [Cynara cardunculus var. scolymus]
TRINITY_DN15098_c0_g1	16.4498	3.10883	0.188989	0.0331152	1	484	-	-	-	virNOG00934	S	-	gi|976912638|gb|KVH99115.1| protein of unknown function DUF3700 [Cynara cardunculus var. scolymus]
TRINITY_DN15147_c0_g1	6.09702	0	0	0.0438688	1	698	-	-	-	-	-	-	-
TRINITY_DN15254_c0_g2	53.5099	19.6435	0.367101	0.0184398	1	940	-	-	-	-	-	-	-
TRINITY_DN15366_c0_g1	447.118	176.776	0.395368	0.0394261	1	1714	GO:0043229;GO:0050896	K17991	-	virNOG01664	R	sp|O22788|PXG3_ARATH Probable peroxygenase 3 OS=Arabidopsis thaliana GN=PXG3 PE=1 SV=1	gi|976914182|gb|KVI00413.1| Caleosin [Cynara cardunculus var. scolymus]
TRINITY_DN15666_c0_g1	56.673	20.7876	0.366799	0.0163221	1	887	-	-	-	-	-	-	-
TRINITY_DN15693_c0_g1	70.0308	27.2878	0.389654	0.0148865	1	1865	-	-	-	virNOG05426;euNOG22836	R	-	gi|976909964|gb|KVH96902.1| Zinc finger, C2H2 [Cynara cardunculus var. scolymus]
TRINITY_DN15698_c0_g1	39.2867	6.28332	0.159935	0.00080043	0.421248	516	GO:0009733	K14488	PF02519	virNOG24497	S	sp|Q9FJG1|SAU19_ARATH Auxin-responsive protein SAUR19 OS=Arabidopsis thaliana GN=SAUR19 PE=2 SV=1	gi|976918992|gb|KVI04138.1| Auxin responsive SAUR protein [Cynara cardunculus var. scolymus]
TRINITY_DN15803_c0_g1	10.5976	0.690852	0.0651897	0.0226203	1	408	GO:0016021	-	-	virNOG39438;KOG0504;virNOG08903	SR	-	gi|976900461|gb|KVH88657.1| Ankyrin repeat-containing protein [Cynara cardunculus var. scolymus]
TRINITY_DN15858_c0_g1	288.07	110.445	0.383397	0.0189127	1	938	GO:0032259;GO:0008171	K00588	PF01596	virNOG04102	Q	sp|Q9C5D7|CAMT3_ARATH Probable caffeoyl-CoA O-methyltransferase At4g26220 OS=Arabidopsis thaliana GN=At4g26220 PE=2 SV=1	gi|658017536|ref|XP_008344119.1| PREDICTED: probable caffeoyl-CoA O-methyltransferase At4g26220 [Malus domestica]
TRINITY_DN16268_c3_g1	25.8579	2.19582	0.0849188	0.000823918	0.427544	950	-	-	-	-	-	-	-
TRINITY_DN16361_c2_g1	46.9614	20.1422	0.428909	0.0488191	1	3109	-	-	-	-	-	-	-
TRINITY_DN16598_c0_g1	30.0144	9.67571	0.322369	0.0416853	1	799	GO:0005773;GO:0016021;GO:0008289	-	-	virNOG05379	I	-	gi|976903997|gb|KVH91745.1| START domain-containing protein, partial [Cynara cardunculus var. scolymus]
TRINITY_DN16790_c0_g1	89.6344	33.1316	0.36963	0.00917601	1	789	-	-	-	virNOG25240;virNOG25310	S	-	gi|747085233|ref|XP_011090066.1| PREDICTED: uncharacterized protein LOC105170841 [Sesamum indicum]
TRINITY_DN16839_c1_g1	123.798	47.2907	0.381999	0.0036045	1	1695	-	-	-	virNOG13797;virNOG15897	S	-	gi|720055154|ref|XP_010273286.1| PREDICTED: uncharacterized protein LOC104608867 [Nelumbo nucifera]
TRINITY_DN16886_c0_g1	12.969	1.51627	0.116914	0.0332501	1	730	-	-	-	virNOG07195	T	sp|Q9ST27|PHOT2_ORYSJ Phototropin-2 OS=Oryza sativa subsp. japonica GN=PHOT2 PE=1 SV=1	gi|1001011916|gb|AML76455.1| putative LOV domain-containing protein [Zaleya pentandra]
TRINITY_DN17150_c0_g1	28.5369	7.77611	0.272493	0.0212766	1	1315	-	-	-	-	-	-	-
TRINITY_DN17245_c0_g1	59.5569	25.9481	0.435685	0.0408144	1	1813	-	-	-	-	-	-	-
TRINITY_DN17370_c0_g1	35.4203	8.12153	0.22929	0.0330668	1	571	GO:0009733	K14488	PF02519	virNOG21620	S	sp|P0DKL1|SAU50_HELAN Auxin-responsive protein SAUR50 OS=Helianthus annuus PE=3 SV=1	gi|976917489|gb|KVI02941.1| Auxin responsive SAUR protein [Cynara cardunculus var. scolymus]
TRINITY_DN17422_c0_g1	387.585	85.2905	0.220056	3.96374e-08	0.000196086	1120	GO:0005509;GO:0015979;GO:0009654;GO:0009535;GO:0019898	K02717	-	virNOG10974	R	sp|P85189|PSBP_HELAN Oxygen-evolving enhancer protein 2, chloroplastic OS=Helianthus annuus GN=PSBP PE=1 SV=1	gi|302595736|sp|P85189.1|PSBP_HELAN RecName: Full=Oxygen-evolving enhancer protein 2, chloroplastic; Short=OEE2; AltName: Full=23 kDa subunit of oxygen evolving system of photosystem II; AltName: Full=23 kDa thylakoid membrane protein; AltName: Full=OEC 23 kDa subunit; Flags: Precursor
TRINITY_DN17486_c0_g1	78.7973	23.5366	0.298698	0.00163052	0.687461	567	-	-	-	virNOG25140	S	-	gi|976908704|gb|KVH95915.1| hypothetical protein Ccrd_002009 [Cynara cardunculus var. scolymus]
TRINITY_DN17650_c0_g1	13.5461	1.03628	0.0765	0.0110891	1	1010	-	-	-	virNOG23202;COG1266	RT	sp|Q84JK8|MAKR6_ARATH Probable membrane-associated kinase regulator 6 OS=Arabidopsis thaliana GN=MAKR6 PE=2 SV=1	gi|976926294|gb|KVI10162.1| hypothetical protein Ccrd_011423 [Cynara cardunculus var. scolymus]
TRINITY_DN17933_c0_g1	45.9741	18.971	0.412645	0.0466705	1	1892	-	-	-	virNOG33622;KOG0017;virNOG39142;virNOG31652	SR	-	gi|1000957992|ref|XP_015576947.1| PREDICTED: uncharacterized protein LOC107261521 [Ricinus communis]
TRINITY_DN18230_c0_g1	984.827	431.707	0.438358	0.0104387	1	1961	-	-	PF00657	virNOG07082;virNOG29194	R	sp|Q9C7N4|GDL15_ARATH GDSL esterase/lipase At1g29670 OS=Arabidopsis thaliana GN=At1g29670 PE=2 SV=1	gi|976914917|gb|KVI00927.1| Lipase, GDSL [Cynara cardunculus var. scolymus]
TRINITY_DN18293_c2_g1	20.4497	2.98232	0.145837	0.00980847	1	915	-	-	-	-	-	-	-
TRINITY_DN18498_c0_g1	70.0505	30.0414	0.428853	0.030164	1	2395	GO:0006810;GO:0016021	K15119	-	virNOG04278	C	sp|Q944H5|MTM1_ARATH Mitochondrial carrier protein MTM1 OS=Arabidopsis thaliana GN=MTM1 PE=2 SV=1	gi|976926325|gb|KVI10193.1| hypothetical protein Ccrd_011413, partial [Cynara cardunculus var. scolymus]
TRINITY_DN18735_c0_g1	91.8082	43.3793	0.472499	0.0296817	1	930	-	-	-	-	-	-	-
TRINITY_DN18794_c0_g1	6.11983	0	0	0.0435627	1	982	-	-	-	-	-	-	-
TRINITY_DN18956_c0_g2	58.2213	25.7878	0.442927	0.0447566	1	1235	-	-	-	virNOG10844	S	-	gi|685368408|ref|XP_009118120.1| PREDICTED: putative nuclease HARBI1 [Brassica rapa]
TRINITY_DN19075_c0_g1	16.6594	3.36991	0.202283	0.0385737	1	1602	-	-	-	-	-	-	-
TRINITY_DN19286_c0_g1	12.6404	1.60061	0.126627	0.0369688	1	871	-	-	-	virNOG16111;virNOG01280;NOG23054	ST	-	gi|902085172|gb|KNA03177.1| hypothetical protein SOVF_211670 isoform B [Spinacia oleracea]
TRINITY_DN19622_c0_g1	41.1595	12.4379	0.302187	0.015597	1	2740	-	-	-	virNOG12278	S	sp|Q9LVG9|Y5600_ARATH BTB/POZ domain-containing protein At5g60050 OS=Arabidopsis thaliana GN=At5g60050 PE=2 SV=1	gi|976918401|gb|KVI03582.1| BTB/POZ fold [Cynara cardunculus var. scolymus]
TRINITY_DN19692_c0_g2	12.9023	1.03628	0.0803174	0.0144827	1	881	-	-	-	-	-	-	-
TRINITY_DN19729_c0_g1	35.2985	11.9601	0.338828	0.03035	1	793	-	-	-	-	-	-	-
TRINITY_DN19806_c0_g1	11.5697	0.345426	0.0298561	0.00716305	1	943	-	-	-	-	-	-	-
TRINITY_DN19869_c0_g3	62.5418	9.07346	0.145078	2.52288e-05	0.0353226	1473	GO:0030286;GO:0007017	K10418	-	virNOG21212;KOG3430	Z	sp|Q86A88|DYL_DICDI Dynein light chain, cytoplasmic OS=Dictyostelium discoideum GN=dlcB PE=3 SV=1	gi|976915343|gb|KVI01305.1| Dynein light chain, type 1/2 [Cynara cardunculus var. scolymus]
TRINITY_DN20232_c0_g1	125.653	61.8231	0.492016	0.0237734	1	1300	-	-	-	-	-	-	-
TRINITY_DN20456_c0_g1	47.7975	16.1771	0.33845	0.0154626	1	1419	GO:0016021	-	PF13855	virNOG00481	R	sp|Q9SN38|RLP51_ARATH Receptor-like protein 51 OS=Arabidopsis thaliana GN=RLP51 PE=1 SV=1	gi|976899445|gb|KVH87957.1| Leucine-rich repeat-containing protein [Cynara cardunculus var. scolymus]
TRINITY_DN20469_c0_g1	39.8443	15.0162	0.376871	0.0440415	1	1008	-	-	PF12796	KOG0504;virNOG36437	R	-	gi|976900460|gb|KVH88656.1| Ankyrin repeat-containing protein [Cynara cardunculus var. scolymus]
TRINITY_DN20805_c0_g1	44.4746	15.3461	0.345054	0.048595	1	2691	GO:0016020;GO:0000166;GO:0016310;GO:0004672	-	PF00954;PF01453;PF07714	virNOG20952;virNOG11987	UT	sp|P93756|SD31_ARATH G-type lectin S-receptor-like serine/threonine-protein kinase SD3-1 OS=Arabidopsis thaliana GN=SD31 PE=3 SV=1	gi|225435737|ref|XP_002283563.1| PREDICTED: G-type lectin S-receptor-like serine/threonine-protein kinase SD3-1 [Vitis vinifera]
TRINITY_DN20805_c0_g2	172.199	78.2309	0.454304	0.00813722	1	2664	GO:0016020;GO:0004672;GO:0016310;GO:0000166	-	PF07714;PF01453;PF00954	virNOG11987;virNOG20952	UT	sp|P93756|SD31_ARATH G-type lectin S-receptor-like serine/threonine-protein kinase SD3-1 OS=Arabidopsis thaliana GN=SD31 PE=3 SV=1	gi|225435737|ref|XP_002283563.1| PREDICTED: G-type lectin S-receptor-like serine/threonine-protein kinase SD3-1 [Vitis vinifera]
TRINITY_DN20908_c0_g1	46.7912	19.5756	0.418361	0.0474632	1	985	-	K02291	-	virNOG01008	I	sp|Q9SSU8|PSY_DAUCA Phytoene synthase, chloroplastic OS=Daucus carota GN=PSY PE=2 SV=1	gi|703087083|ref|XP_010093179.1| Phytoene synthase [Morus notabilis] &gt;gi|587863945|gb|EXB53667.1| Phytoene synthase [Morus notabilis]
TRINITY_DN21046_c0_g1	143.416	58.8317	0.410217	0.00411834	1	1016	GO:0016168;GO:0009765;GO:0016021;GO:0018298;GO:0009535	K08916	-	virNOG07792	R	sp|Q9XF89|CB5_ARATH Chlorophyll a-b binding protein CP26, chloroplastic OS=Arabidopsis thaliana GN=LHCB5 PE=1 SV=1	gi|641823519|gb|KDO42920.1| hypothetical protein CISIN_1g0225291mg [Citrus sinensis] &gt;gi|641823520|gb|KDO42921.1| hypothetical protein CISIN_1g0225291mg [Citrus sinensis]
TRINITY_DN21537_c0_g1	58.7348	20.5449	0.349791	0.0128652	1	650	-	-	-	-	-	-	-
TRINITY_DN21550_c0_g1	24.0055	4.66727	0.194426	0.0158262	1	1296	GO:0006629;GO:0004318;GO:0005737;GO:0016021;GO:0055114	K10258	PF02544	virNOG08079	I	sp|Q9M2U2|TECR_ARATH Very-long-chain enoyl-CoA reductase OS=Arabidopsis thaliana GN=ECR PE=1 SV=1	gi|976920180|gb|KVI04921.1| hypothetical protein Ccrd_016772 [Cynara cardunculus var. scolymus]
TRINITY_DN21713_c0_g1	48.6384	19.8118	0.407329	0.0423681	1	2570	-	-	PF14383;PF14309	virNOG04552	S	-	gi|976906953|gb|KVH94350.1| hypothetical protein Ccrd_003589 [Cynara cardunculus var. scolymus]
TRINITY_DN21715_c0_g1	160.701	55.5715	0.345807	0.000675883	0.37405	4909	-	-	-	-	-	-	gi|748015745|gb|AJE29374.1| putative gag protein [Coffea canephora]
TRINITY_DN21961_c0_g4	8.52788	0.345426	0.0405055	0.0483888	1	907	-	-	-	-	-	-	-
TRINITY_DN22630_c0_g1	248.933	69.1837	0.277921	0.0496765	1	2081	GO:0051213	K09840	PF03055	virNOG06560	Q	sp|O49675|CCD4_ARATH Probable carotenoid cleavage dioxygenase 4, chloroplastic OS=Arabidopsis thaliana GN=CCD4 PE=1 SV=1	gi|976923438|gb|KVI07768.1| Carotenoid oxygenase [Cynara cardunculus var. scolymus]
TRINITY_DN22945_c2_g1	121.456	52.8276	0.434952	0.0122635	1	2700	-	K02896	-	virNOG01957	J	sp|O22165|RLP24_ARATH Probable ribosome biogenesis protein RLP24 OS=Arabidopsis thaliana GN=At2g44860 PE=1 SV=1	gi|1012258255|ref|XP_015945408.1| PREDICTED: probable ribosome biogenesis protein RLP24 [Arachis duranensis]
TRINITY_DN23110_c0_g1	100.842	21.9298	0.217467	4.07937e-05	0.0521914	796	-	K03542	-	virNOG10593	R	-	gi|224063082|ref|XP_002300987.1| Photosystem II 22 kDa family protein [Populus trichocarpa] &gt;gi|118488707|gb|ABK96164.1| unknown [Populus trichocarpa] &gt;gi|222842713|gb|EEE80260.1| Photosystem II 22 kDa family protein [Populus trichocarpa]
TRINITY_DN23283_c0_g1	69.1856	26.0465	0.376473	0.014717	1	3357	-	-	PF14223	KOG0017	R	-	gi|460366928|ref|XP_004229327.1| PREDICTED: uncharacterized protein LOC101267053 [Solanum lycopersicum]
TRINITY_DN23712_c0_g1	74.9548	35.6973	0.476251	0.0461046	1	1671	-	-	-	-	-	-	-
TRINITY_DN23724_c0_g1	786.734	392.534	0.498941	0.00440533	1	1245	GO:0005634;GO:0006355;GO:0003677	-	PF00249	virNOG04968	K	sp|Q9FNN6|SRM1_ARATH Transcription factor SRM1 OS=Arabidopsis thaliana GN=SRM1 PE=1 SV=1	gi|976921834|gb|KVI06495.1| Homeodomain-like protein, partial [Cynara cardunculus var. scolymus]
TRINITY_DN23842_c1_g1	8.87964	0.690852	0.0778017	0.046926	1	644	-	-	-	COG2801;virNOG15679	LR	-	gi|38344008|emb|CAE03176.2| OSJNBa0070O11.7 [Oryza sativa Japonica Group]
TRINITY_DN24283_c0_g1	79.7724	29.4924	0.369706	0.0389567	1	2100	GO:0016702;GO:0055114	K09840	PF03055	virNOG05544	Q	sp|Q9M6E8|NCED1_PHAVU 9-cis-epoxycarotenoid dioxygenase NCED1, chloroplastic OS=Phaseolus vulgaris GN=NCED1 PE=2 SV=1	gi|84579406|dbj|BAE72090.1| Lactuca sativa 9-cis-epoxycarotenoid dioxygenase 1
TRINITY_DN24618_c0_g1	22.6356	4.91996	0.217355	0.0264206	1	1086	GO:0019538	-	-	KOG1339;virNOG02462	O	-	gi|976923551|gb|KVI07870.1| Aspartic peptidase [Cynara cardunculus var. scolymus]
TRINITY_DN24831_c1_g1	6.16345	0	0	0.0429856	1	644	GO:0005524;GO:0055085;GO:0016021;GO:0005886;GO:0042626	-	PF01061	virNOG05419	Q	sp|Q9ZUU9|AB3G_ARATH ABC transporter G family member 3 OS=Arabidopsis thaliana GN=ABCG3 PE=1 SV=2	gi|747083731|ref|XP_011089242.1| PREDICTED: ABC transporter G family member 3 [Sesamum indicum] &gt;gi|747083733|ref|XP_011089244.1| PREDICTED: ABC transporter G family member 3 [Sesamum indicum]
TRINITY_DN24833_c0_g1	22.2981	5.18944	0.23273	0.0380383	1	1391	GO:0003676;GO:0000166	K12881	-	virNOG07182	A	sp|Q6NQ72|THO4D_ARATH THO complex subunit 4D OS=Arabidopsis thaliana GN=ALY4 PE=1 SV=1	gi|976917733|gb|KVI03114.1| Nucleotide-binding, alpha-beta plait [Cynara cardunculus var. scolymus]
TRINITY_DN25089_c0_g1	27.6157	7.91582	0.286641	0.0308043	1	986	-	-	-	virNOG31300;KOG0017	R	sp|Q94HW2|POLR1_ARATH Retrovirus-related Pol polyprotein from transposon RE1 OS=Arabidopsis thaliana GN=RE1 PE=2 SV=1	gi|802555480|ref|XP_012065458.1| PREDICTED: uncharacterized protein LOC105628624 [Jatropha curcas]
TRINITY_DN25222_c0_g2	11.3021	0.951933	0.0842261	0.028463	1	807	-	-	-	-	-	-	-
TRINITY_DN25458_c0_g1	87.4369	22.0129	0.251758	0.000318509	0.223935	669	-	K01673	-	virNOG12703	P	sp|P46510|CAHX_FLABI Carbonic anhydrase OS=Flaveria bidentis PE=2 SV=2	gi|47606728|sp|P46510.2|CAHX_FLABI RecName: Full=Carbonic anhydrase; AltName: Full=Carbonate dehydratase &gt;gi|40737972|gb|AAA86939.2| carbonic anhydrase [Flaveria bidentis]
TRINITY_DN25556_c0_g1	100.077	39.5829	0.395526	0.00718016	1	2606	-	-	PF14223	virNOG05810;KOG0017	R	sp|Q94HW2|POLR1_ARATH Retrovirus-related Pol polyprotein from transposon RE1 OS=Arabidopsis thaliana GN=RE1 PE=2 SV=1	gi|147785835|emb|CAN73071.1| hypothetical protein VITISV_032383 [Vitis vinifera]
TRINITY_DN25724_c0_g1	210.377	85.6174	0.40697	0.00240419	0.855314	541	-	-	-	virNOG25489;virNOG27051	S	-	gi|976901344|gb|KVH89399.1| hypothetical protein Ccrd_008609 [Cynara cardunculus var. scolymus]
TRINITY_DN25843_c0_g1	14.9381	1.82981	0.122493	0.0231581	1	828	-	-	-	-	-	-	-
TRINITY_DN26606_c0_g1	23.2584	6.3963	0.27501	0.0454709	1	797	-	-	-	-	-	-	-
TRINITY_DN26777_c0_g1	173.385	76.4224	0.440766	0.00918164	1	1769	GO:0005509;GO:0031307;GO:0007264;GO:0003924;GO:0005525;GO:0007005	-	-	-	-	-	gi|976918780|gb|KVI03941.1| hypothetical protein Ccrd_017760, partial [Cynara cardunculus var. scolymus]
TRINITY_DN27598_c0_g1	7.43298	0	0	0.021112	1	618	-	-	-	-	-	-	-
TRINITY_DN29310_c0_g2	567.688	201.895	0.355645	6.7172e-05	0.0733014	1048	-	-	-	-	-	-	-
TRINITY_DN29496_c0_g1	174.482	76.869	0.440557	0.00715794	1	2609	GO:0005524;GO:0004674;GO:0018108;GO:0004715	-	PF07714	virNOG08746	T	sp|Q9SY91|PBL15_ARATH Probable serine/threonine-protein kinase PBL15 OS=Arabidopsis thaliana GN=PBL15 PE=1 SV=1	gi|976903857|gb|KVH91613.1| Protein kinase, ATP binding site-containing protein [Cynara cardunculus var. scolymus]
TRINITY_DN30121_c0_g1	19.4195	3.63614	0.187242	0.022396	1	682	-	-	-	-	-	-	-
TRINITY_DN30134_c0_g1	37.4762	4.7751	0.127417	0.00043034	0.27517	758	GO:0008974;GO:0005975;GO:0005524;GO:0016310	K00855	-	virNOG05206	TZ	sp|P26302|KPPR_WHEAT Phosphoribulokinase, chloroplastic OS=Triticum aestivum PE=2 SV=1	gi|470128485|ref|XP_004300170.1| PREDICTED: phosphoribulokinase, chloroplastic [Fragaria vesca subsp. vesca]
TRINITY_DN30770_c0_g1	148.577	62.0105	0.417364	0.00479563	1	616	-	K02695	-	virNOG19231	R	sp|Q9SUI7|PSAH1_ARATH Photosystem I reaction center subunit VI-1, chloroplastic OS=Arabidopsis thaliana GN=PSAH1 PE=2 SV=1	gi|567132351|ref|XP_006392942.1| hypothetical protein EUTSA_v10011814mg [Eutrema salsugineum] &gt;gi|557089520|gb|ESQ30228.1| hypothetical protein EUTSA_v10011814mg [Eutrema salsugineum]
TRINITY_DN32481_c0_g1	56.2648	25.0077	0.444463	0.0450942	1	1742	GO:0005524;GO:0005634;GO:0006355;GO:0032502	-	-	virNOG02410;virNOG22599;virNOG11081	K	sp|Q9SU44|GRF8_ARATH Growth-regulating factor 8 OS=Arabidopsis thaliana GN=GRF8 PE=2 SV=1	gi|976903992|gb|KVH91740.1| Glutamine-Leucine-Glutamine, QLQ [Cynara cardunculus var. scolymus]
TRINITY_DN33724_c1_g1	82.6837	29.6886	0.359062	0.0478883	1	1652	-	-	PF07247	virNOG07256	S	-	gi|976908677|gb|KVH95891.1| hypothetical protein Ccrd_002045 [Cynara cardunculus var. scolymus]
TRINITY_DN33760_c0_g1	22.7896	5.37646	0.235917	0.0309208	1	1009	-	-	-	-	-	-	-
TRINITY_DN33770_c0_g1	40.9396	14.1105	0.344667	0.028167	1	628	GO:0009733	K14488	-	virNOG22742	S	sp|Q9LTV3|SAU72_ARATH Auxin-responsive protein SAUR72 OS=Arabidopsis thaliana GN=SAUR72 PE=2 SV=1	gi|565358436|ref|XP_006346033.1| PREDICTED: auxin-responsive protein SAUR71 [Solanum tuberosum]
TRINITY_DN34375_c3_g1	39.1599	5.07836	0.129682	0.00036688	0.248989	1560	-	-	-	-	-	-	-
TRINITY_DN34449_c0_g1	38.0103	11.7892	0.310158	0.0415795	1	983	-	K20223	-	COG5656;virNOG01094	OUY	sp|F4J738|SAD2H_ARATH Importin beta-like SAD2 homolog OS=Arabidopsis thaliana GN=At3g59020 PE=1 SV=1	gi|976910818|gb|KVH97489.1| Armadillo-like helical [Cynara cardunculus var. scolymus]
TRINITY_DN34688_c0_g2	49.2732	21.2184	0.430627	0.0480119	1	1120	-	-	-	virNOG38418;KOG1075;virNOG01327	R	-	gi|1012343421|gb|KYP54613.1| Transposon TX1 uncharacterized [Cajanus cajan]
TRINITY_DN34756_c0_g2	8.49869	0	0	0.0117984	1	526	GO:0007165;GO:0008536;GO:0005635;GO:0008565;GO:0006606;GO:0005829	K20223	-	virNOG01094	UY	sp|F4IRR2|SAD2_ARATH Importin beta-like SAD2 OS=Arabidopsis thaliana GN=SAD2 PE=1 SV=1	gi|976910818|gb|KVH97489.1| Armadillo-like helical [Cynara cardunculus var. scolymus]
TRINITY_DN35171_c0_g1	18.954	4.79379	0.252917	0.0450676	1	1423	-	-	PF00226;PF14308	virNOG04180	O	sp|Q8GYX8|DNJ10_ARATH Chaperone protein dnaJ 10 OS=Arabidopsis thaliana GN=ATJ10 PE=2 SV=2	gi|747057018|ref|XP_011074793.1| PREDICTED: chaperone protein dnaJ 10 [Sesamum indicum]
TRINITY_DN35216_c0_g1	16.9793	0.951933	0.0560645	0.00281913	0.946578	949	-	-	-	-	-	-	-
TRINITY_DN35906_c0_g1	220.451	93.4011	0.423682	0.00229808	0.835927	1186	-	-	PF03181	virNOG16059	R	sp|O65009|BNM2A_BRANA BURP domain-containing protein BNM2A OS=Brassica napus GN=BNM2A PE=2 SV=1	gi|976926839|gb|KVI10683.1| BURP domain-containing protein [Cynara cardunculus var. scolymus]
TRINITY_DN35990_c1_g2	6.1252	0	0	0.0434911	1	710	-	-	-	-	-	-	-
TRINITY_DN36609_c1_g1	252.538	124.701	0.49379	0.0496527	1	1851	-	-	-	-	-	-	-
TRINITY_DN36721_c0_g1	1078.67	313.664	0.290787	4.6393e-05	0.0555256	2215	-	-	-	virNOG23202;COG1266	RT	sp|Q84JK8|MAKR6_ARATH Probable membrane-associated kinase regulator 6 OS=Arabidopsis thaliana GN=MAKR6 PE=2 SV=1	gi|976919887|gb|KVI04669.1| hypothetical protein Ccrd_017012 [Cynara cardunculus var. scolymus]
TRINITY_DN36722_c1_g1	22.8547	6.78715	0.29697	0.0482214	1	1306	-	-	-	-	-	-	-
TRINITY_DN39027_c0_g1	29.0285	7.81178	0.269107	0.0271416	1	2088	GO:0005507;GO:0016491;GO:0016021;GO:0055114	-	PF07731	virNOG06469;virNOG16785	Q	sp|Q8VXX5|SKS1_ARATH Monocopper oxidase-like protein SKS1 OS=Arabidopsis thaliana GN=SKS1 PE=1 SV=1	gi|747059868|ref|XP_011076336.1| PREDICTED: monocopper oxidase-like protein SKU5 [Sesamum indicum]
TRINITY_DN40398_c0_g1	21.0371	4.84916	0.230505	0.0328046	1	900	GO:0016491;GO:0055114;GO:0008270	K07119	-	virNOG06682	R	sp|Q9SLN8|DBR_TOBAC 2-alkenal reductase (NADP(+)-dependent) OS=Nicotiana tabacum GN=DBR PE=1 SV=1	gi|568849626|ref|XP_006478548.1| PREDICTED: 2-alkenal reductase (NADP(+)-dependent)-like isoform X1 [Citrus sinensis]
TRINITY_DN40830_c0_g1	80.3989	40.0078	0.497617	0.0442854	1	1061	GO:0016021;GO:0005886	-	PF04535	virNOG08378	S	sp|A7R385|CSPLC_VITVI CASP-like protein 2B1 OS=Vitis vinifera GN=GSVIVT00013502001 PE=2 SV=1	gi|976909681|gb|KVH96744.1| Uncharacterized protein family UPF0497, trans-membrane plant [Cynara cardunculus var. scolymus]
TRINITY_DN41719_c0_g1	140.842	58.4726	0.415164	0.0294877	1	1539	-	-	PF13855;PF08263	virNOG00479	R	-	gi|976900571|gb|KVH88753.1| Leucine-rich repeat-containing protein [Cynara cardunculus var. scolymus]
TRINITY_DN42186_c0_g1	10.4728	0.994105	0.0949229	0.03791	1	643	-	-	-	-	-	-	-
TRINITY_DN43084_c0_g3	17.6382	1.21301	0.0687721	0.0157002	1	1151	-	-	-	-	-	-	-
TRINITY_DN43383_c0_g1	33.7557	11.2773	0.334087	0.0370084	1	1175	-	-	-	-	-	-	-
TRINITY_DN44214_c0_g1	31.7189	7.99501	0.252058	0.0127642	1	1415	-	-	PF04450	virNOG12093	R	sp|Q7XR61|MTK1_ORYSJ Methylthioribose kinase 1 OS=Oryza sativa subsp. japonica GN=MTK1 PE=2 SV=1	gi|976905709|gb|KVH93329.1| Uncharacterized protein family, basic secretory protein [Cynara cardunculus var. scolymus]
TRINITY_DN47301_c0_g1	26.0916	5.70355	0.218597	0.0132698	1	568	GO:0009507;GO:0005524	-	-	virNOG01517	O	sp|P10871|RCA_SPIOL Ribulose bisphosphate carboxylase/oxygenase activase, chloroplastic OS=Spinacia oleracea PE=1 SV=2	gi|12643998|sp|P10871.2|RCA_SPIOL RecName: Full=Ribulose bisphosphate carboxylase/oxygenase activase, chloroplastic; Short=RA; Short=RuBisCO activase; Flags: Precursor [Spinacia oleracea] &gt;gi|4261546|gb|AAD13840.1|S45033_1 ribulosebisphosphate carboxylase/oxygenase activase [Spinacia oleracea]
TRINITY_DN47809_c0_g1	14.5675	2.21741	0.152216	0.0347574	1	1761	-	-	-	-	-	-	-
TRINITY_DN48397_c0_g1	25.5561	3.35123	0.131132	0.00390394	1	2632	-	-	-	COG2801;virNOG15679	LR	-	gi|28558781|gb|AAO45752.1| pol protein [Cucumis melo subsp. melo]
TRINITY_DN48795_c0_g1	7.46116	0	0	0.0207125	1	572	-	-	-	-	-	-	-
TRINITY_DN48994_c0_g1	17.7734	3.2434	0.182486	0.028858	1	814	-	-	-	-	-	-	-
TRINITY_DN49965_c0_g1	12.6807	0.648679	0.051155	0.00936561	1	1286	-	-	-	-	-	-	-
TRINITY_DN58196_c0_g1	17.3029	3.59911	0.208007	0.0400184	1	1565	-	-	-	-	-	-	-
TRINITY_DN60643_c0_g1	128.951	44.1166	0.34212	0.00297631	0.977244	634	-	K01623	-	virNOG10404	G	sp|Q944G9|ALFP2_ARATH Fructose-bisphosphate aldolase 2, chloroplastic OS=Arabidopsis thaliana GN=FBA2 PE=1 SV=2	gi|697136244|ref|XP_009622198.1| PREDICTED: probable fructose-bisphosphate aldolase 3, chloroplastic [Nicotiana tomentosiformis]
TRINITY_DN64070_c0_g1	318.865	139.868	0.438642	0.00902584	1	643	-	-	-	-	-	-	-
TRINITY_DN64585_c3_g1	15.3895	2.83935	0.1845	0.0460783	1	990	-	-	-	-	-	-	-
TRINITY_DN70897_c0_g1	97.4991	37.5364	0.384992	0.00815038	1	477	GO:0005524	-	-	virNOG01517;KOG0651	O	sp|Q40281|RCA_MALDO Ribulose bisphosphate carboxylase/oxygenase activase, chloroplastic OS=Malus domestica GN=RCA PE=2 SV=1	gi|470143638|ref|XP_004307478.1| PREDICTED: ribulose bisphosphate carboxylase/oxygenase activase, chloroplastic isoform X1 [Fragaria vesca subsp. vesca]
TRINITY_DN70949_c0_g1	172.81	56.7451	0.328367	0.00114514	0.548225	1380	-	-	-	-	-	-	-
TRINITY_DN77313_c0_g1	34.7114	11.3668	0.327467	0.0308164	1	682	GO:0015035;GO:0045454;GO:0009055;GO:0055114;GO:0005623	K03676	PF00462	virNOG20657	O	sp|Q6K609|GRXC3_ORYSJ Glutaredoxin-C3 OS=Oryza sativa subsp. japonica GN=GRXC3 PE=2 SV=1	gi|225451521|ref|XP_002272852.1| PREDICTED: glutaredoxin-C1 [Vitis vinifera]
TRINITY_DN78146_c0_g1	493.315	172.53	0.349737	0.0334007	1	1756	GO:0005506;GO:0016705;GO:0020037;GO:0016020;GO:0004497;GO:0055114	-	PF00067	virNOG13088	Q	sp|O65782|C83B1_ARATH Cytochrome P450 83B1 OS=Arabidopsis thaliana GN=CYP83B1 PE=1 SV=1	gi|308190434|gb|ADO16182.1| cytochrome P450 mono-oxygenase [Artemisia annua]
TRINITY_DN81784_c0_g1	518.75	181.844	0.350543	0.0392706	1	1695	GO:0020037;GO:0055114;GO:0004497;GO:0005506;GO:0016705;GO:0016021	-	PF00067	virNOG09461	Q	sp|Q50EK3|C04C1_PINTA Cytochrome P450 704C1 OS=Pinus taeda GN=CYP704C1 PE=2 SV=1	gi|976927136|gb|KVI10950.1| cytochrome P450 [Cynara cardunculus var. scolymus]
TRINITY_DN84554_c0_g1	187.791	44.8786	0.238982	3.93987e-06	0.00749636	1082	-	-	PF07279	virNOG18783	S	-	gi|976926228|gb|KVI10098.1| hypothetical protein Ccrd_011513 [Cynara cardunculus var. scolymus]
TRINITY_DN86119_c0_g1	8.14524	0	0	0.0142594	1	510	-	-	-	-	-	-	-
TRINITY_DN87509_c0_g1	7.81796	0.345426	0.0441836	0.0423506	1	417	-	-	-	-	-	-	-
